# Supplementary material for: Design, Synthesis, and Antifungal Activity of Novel Longifolene-Derived Diacylhydrazine Compounds
Source: PubMed Central journal article supplement — ACS Omega. 2021 Mar 24;6(13):9104–11. doi: 10.1021/acsomega.1c00217 (PMC8028131; doi:10.1021/acsomega.1c00217), 2021-03-24
Supplement: ao1c00217_si_001.pdf [file ao1c00217_si_001.pdf]

Supporting Information

# Design, Synthesis and Antifungal Activity of Novel Longifolene-Derived Diacylhydrazine Compounds

Shuyan Zhao,<sup>†</sup> Guishan Lin,<sup>\*†</sup> Wengui Duan,<sup>\*†</sup> Qianan Zhang,<sup>†</sup> Yinglan Huang,<sup>†</sup>  
and Fuhou Lei<sup>‡</sup>

<sup>†</sup> School of Chemistry and Chemical Engineering, Guangxi University, No. 100,  
Daxue Dong Road, Nanning, Guangxi 530004, P. R. China

<sup>‡</sup> Guangxi Key Laboratory of Chemistry and Engineering of Forest Products, Guangxi  
Collaborative Innovation Center for Chemistry and Engineering of Forest Products,  
Guangxi University for Nationalities, No. 188, Daxue Dong Road, Nanning, Guangxi  
530006, China

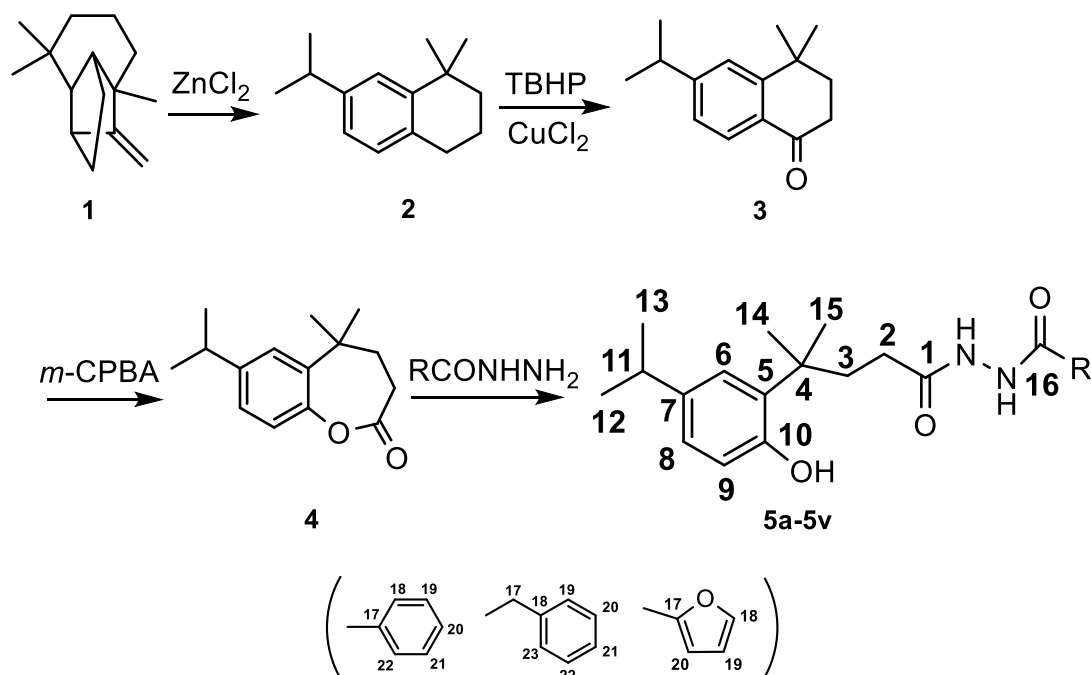

Scheme S1. Synthetic Route of the Longifolene-derived Diacylhydrazine Compounds

**5a-5v** (Table 1).

**Table S1.** The R Groups of the Compounds **5a-5v**.

| compounds | R                             | compounds | R                               | compounds | R                                             |
|-----------|-------------------------------|-----------|---------------------------------|-----------|-----------------------------------------------|
| <b>5a</b> | <i>o</i> -I Ph                | <b>5i</b> | <i>o</i> -CF <sub>3</sub> Ph    | <b>5q</b> | <i>p</i> -C(CH <sub>3</sub> ) <sub>3</sub> Ph |
| <b>5b</b> | 2,4-OH Ph                     | <b>5j</b> | <i>o</i> -NO <sub>2</sub> Ph    | <b>5r</b> | Ph                                            |
| <b>5c</b> | <i>o</i> -OH Ph               | <b>5k</b> | <i>o</i> -Cl Ph                 | <b>5s</b> | CH <sub>3</sub>                               |
| <b>5d</b> | <i>p</i> -OCH <sub>3</sub> Ph | <b>5l</b> | <i>m</i> -Cl Ph                 | <b>5t</b> | CH <sub>2</sub> Ph                            |
| <b>5e</b> | <i>o</i> -Br Ph               | <b>5m</b> | <i>p</i> -Cl Ph                 | <b>5u</b> | CH <sub>2</sub> CN                            |
| <b>5f</b> | <i>p</i> -Br Ph               | <b>5n</b> | <i>p</i> -CH <sub>3</sub> Ph    | <b>5v</b> | $\alpha$ -furyl                               |
| <b>5g</b> | <i>p</i> -F Ph                | <b>5o</b> | <i>o</i> -CH <sub>3</sub> Ph    |           |                                               |
| <b>5h</b> | <i>o</i> -F Ph                | <b>5p</b> | <i>p</i> -CH <sub>2</sub> OH Ph |           |                                               |

**7-isopropyl-5,5-dimethyl-4,5-dihydrobenzo[b]oxepin-2(3H)-one (4).** The product is obtained as a colorless oily liquid, yield 77.7%. FT-IR  $\nu$  (cm<sup>-1</sup>): 3036 (Ar-H), 2962, 2931, 2872 (C-H), 1769 (C=O), 1607, 1487 (Ar). <sup>1</sup>H NMR (CDCl<sub>3</sub>, 600 MHz):  $\delta$  7.18 (d, *J* = 2.1 Hz, 1H), 7.13 (dd, *J* = 8.2, 2.1 Hz, 1H), 7.01 (d, *J* = 8.2 Hz, 1H), 2.92 (dt, *J* = 13.8, 6.9 Hz, 1H), 2.44 (t, *J* = 7.2 Hz, 2H), 2.07 (t, *J* = 7.2 Hz, 2H), 1.43 (s, 6H), 1.26 (d, *J* = 6.9 Hz, 6H). <sup>13</sup>C NMR (CDCl<sub>3</sub>, 151 MHz):  $\delta$  172.46, 149.53, 146.33, 135.67, 125.60, 124.75, 120.62, 41.17, 36.08, 33.90, 30.82, 29.49, 24.12.

***N'*-(4-(2-hydroxy-5-isopropylphenyl)-4-methylpentanoyl)-2-iodobenzohydrazid e (5a).** The product is obtained as a white powder, yield 78.4%, mp 132.0-132.3°C. FT-IR  $\nu$  (cm<sup>-1</sup>): 3373 (N-H, O-H), 3012 (Ar-H), 2958, 2925, 2867 (C-H), 1692 (C=O), 1504, 1461, 1421, 1383 (Ar), 1249, 1211, 1128, 1078 (C-N). <sup>1</sup>H NMR (600 MHz, DMSO-*d*<sub>6</sub>):  $\delta$  10.06 (s, 1H, -NH), 9.84 (s, 1H, -NH), 9.10 (s, 1H, -OH), 7.90 (d, *J* = 7.9 Hz, 1H, C<sub>19</sub>-H), 7.47 (dd, *J* = 11.1, 4.0 Hz, 1H, C<sub>20</sub>-H), 7.39 (dd, *J* = 7.5, 1.3 Hz,

1H, C<sub>22</sub>-H), 7.20 (td,  $J = 7.7, 1.4$  Hz, 1H, C<sub>21</sub>-H), 6.96 (d,  $J = 1.7$  Hz, 1H, C<sub>6</sub>-H), 6.89 (dd,  $J = 8.1, 1.9$  Hz, 1H, C<sub>8</sub>-H), 6.70 (d,  $J = 8.1$  Hz, 1H, C<sub>9</sub>-H), 2.78 (dt,  $J = 13.6, 6.8$  Hz, 1H, C<sub>11</sub>-H), 2.11 (dd,  $J = 10.4, 6.6$  Hz, 2H, C<sub>2</sub>-H), 1.88 (dd,  $J = 10.4, 6.6$  Hz, 2H, C<sub>3</sub>-H), 1.34 (s, 6H, C<sub>14</sub>-H, C<sub>15</sub>-H), 1.17 (d,  $J = 6.9$  Hz, 6H, C<sub>12</sub>-H, C<sub>13</sub>-H). <sup>13</sup>C NMR (151 MHz, DMSO-*d*<sub>6</sub>):  $\delta$  172.30, 168.10, 154.12, 140.95, 139.89, 138.57, 132.96, 131.83, 129.15, 128.39, 125.88, 124.55, 116.38, 94.17, 37.60, 35.82, 33.33, 30.18, 28.11, 24.81. MS(ESI)  $m/z$ : 517.13 ( [M+Na]<sup>+</sup>). Anal. Calcd. For C<sub>22</sub>H<sub>27</sub>N<sub>2</sub>O<sub>3</sub>: C, 53.45; H, 5.51; N, 5.67. Found: C, 53.47; H, 5.52; N, 5.67.

**2,4-dihydroxy-*N'*-(4-(2-hydroxy-5-isopropylphenyl)-4-methylpentanoyl)benzohydrazide (5b)**. The product is obtained as a white powder, yield 76.5%, mp 184.4-184.6°C. FT-IR  $\nu$  (cm<sup>-1</sup>): 3504, 3369, 3289 (N-H,O-H), 2960, 2924, 2869(C-H), 1668 (C=O), 1507, 1455, 1420, 1350 (Ar), 1246, 1222, 1176, 1082 (C-N). <sup>1</sup>H NMR (600 MHz, DMSO-*d*<sub>6</sub>):  $\delta$  12.22 (s, 1H, -OH), 10.19 (s, 2H, -NH, -OH), 9.80 (s, 1H, -NH), 9.10 (s, 1H, -OH), 7.70 (d,  $J = 8.7$  Hz, 1H, C<sub>22</sub>-H), 6.95 (s, 1H, C<sub>6</sub>-H), 6.89 (d,  $J = 7.9$  Hz, 1H, C<sub>8</sub>-H), 6.70 (d,  $J = 8.0$  Hz, 1H, C<sub>9</sub>-H), 6.32 (d,  $J = 10.0$  Hz, 1H, C<sub>19</sub>-H), 6.28 (s, 1H, C<sub>21</sub>-H), 2.78 (dt,  $J = 13.4, 6.6$  Hz, 1H, C<sub>11</sub>-H), 2.16 – 2.06 (m, 2H, C<sub>2</sub>-H), 1.93 – 1.83 (m, 2H, C<sub>3</sub>-H), 1.34 (s, 6H, C<sub>14</sub>-H, C<sub>15</sub>-H), 1.17 (d,  $J = 6.8$  Hz, 6H, C<sub>12</sub>-H, C<sub>13</sub>-H). <sup>13</sup>C NMR (151 MHz, DMSO-*d*<sub>6</sub>):  $\delta$  172.31, 168.28, 163.04, 162.37, 154.12, 138.58, 132.89, 129.89, 125.89, 124.57, 116.35, 107.88, 106.01, 103.17, 37.60, 35.84, 33.32, 30.19, 28.12, 24.79. MS(ESI)  $m/z$ : 423.22 ( [M+Na]<sup>+</sup>). Anal. Calcd. For C<sub>22</sub>H<sub>28</sub>N<sub>2</sub>O<sub>5</sub>: C, 65.98; H, 7.05; N, 7.00; Found: C, 66.00; H, 7.07; N, 7.01.

**2-hydroxy-*N'*-(4-(2-hydroxy-5-isopropylphenyl)-4-methylpentanoyl)benzohydra**

**azide (5c).** The product is obtained as a white powder, yield 76.9%, mp 89.9-90.3°C. FT-IR  $\nu$  (cm<sup>-1</sup>): 3268 (N-H, O-H), 3041 (Ar-H), 2958, 2928, 2869 (C-H), 1682 (C=O), 1505, 1488, 1420, 1364 (Ar), 1303, 1242, 1210, 1081 (C-N). <sup>1</sup>H NMR (600 MHz, CDCl<sub>3</sub>):  $\delta$  11.12 (s, 1H, -OH), 10.01 (d,  $J$  = 2.5 Hz, 1H, -NH), 8.60 (d,  $J$  = 1.9 Hz, 1H, -NH), 7.53 (dd,  $J$  = 8.0, 1.1 Hz, 1H, C<sub>22</sub>-H), 7.28 – 7.25 (m, 1H, C<sub>20</sub>-H), 6.98 (d,  $J$  = 1.9 Hz, 1H, C<sub>6</sub>-H), 6.86 (dd,  $J$  = 8.1, 2.0 Hz, 1H, C<sub>19</sub>-H), 6.81 (d,  $J$  = 8.2 Hz, 1H, C<sub>8</sub>-H), 6.71 (t,  $J$  = 7.6 Hz, 1H, C<sub>21</sub>-H), 6.62 (d,  $J$  = 8.1 Hz, 1H, C<sub>9</sub>-H), 6.44 (s, 1H, -OH), 2.79 (dt,  $J$  = 13.8, 6.9 Hz, 1H, C<sub>11</sub>-H), 2.30 – 2.21 (m, 2H, C<sub>2</sub>-H), 2.02 – 1.96 (m, 2H, C<sub>3</sub>-H), 1.32 (s, 6H, C<sub>14</sub>-H, C<sub>15</sub>-H), 1.18 (d,  $J$  = 6.9 Hz, 6H, C<sub>12</sub>-H, C<sub>13</sub>-H). <sup>13</sup>C NMR (151 MHz, CDCl<sub>3</sub>):  $\delta$  173.94, 167.37, 159.95, 152.31, 140.67, 134.81, 132.58, 127.09, 126.41, 124.84, 119.41, 118.03, 116.74, 112.74, 37.90, 36.12, 33.52, 31.09, 28.13, 24.29. MS(ESI)  $m/z$ : 407.20 ( [M+Na]<sup>+</sup>). Anal. Calcd. For C<sub>22</sub>H<sub>28</sub>N<sub>2</sub>O<sub>4</sub>: C, 68.73; H, 7.34; N, 7.29; Found: C, 68.74; H, 7.36; N, 7.27.

***N'*-(4-(2-hydroxy-5-isopropylphenyl)-4-methylpentanoyl)-4-methoxybenzohydr azide (5d).** The product is obtained as a white powder, yield 76.5%, mp 93.7-94.0°C. FT-IR  $\nu$  (cm<sup>-1</sup>): 3378, 3265 (N-H, O-H), 3006 (Ar-H), 2958, 2931, 2869, 2842 (C-H), 1676 (C=O), 1504, 1462, 1419 (Ar), 1258, 1174, 1120, 1082, 1028 (C-N). <sup>1</sup>H NMR (600 MHz, DMSO-*d*<sub>6</sub>):  $\delta$  10.05 (s, 1H, -NH), 9.63 (s, 1H, -NH), 9.09 (s, 1H, -OH), 7.84 (d,  $J$  = 8.8 Hz, 2H, C<sub>18</sub>-H, C<sub>22</sub>-H), 7.01 (d,  $J$  = 8.8 Hz, 2H, C<sub>19</sub>-H, C<sub>21</sub>-H), 6.96 (d,  $J$  = 1.8 Hz, 1H, C<sub>6</sub>-H), 6.89 (dd,  $J$  = 8.1, 2.0 Hz, 1H, C<sub>8</sub>-H), 6.71 (d,  $J$  = 8.1 Hz, 1H, C<sub>9</sub>-H), 3.82 (s, 3H, C<sub>23</sub>-H), 2.78 (dt,  $J$  = 13.7, 6.9 Hz, 1H, C<sub>11</sub>-H), 2.11 (dd,  $J$  = 10.5, 6.5 Hz, 2H, C<sub>2</sub>-H), 1.88 (dd,  $J$  = 10.5, 6.4 Hz, 2H, C<sub>3</sub>-H), 1.34 (s, 6H, C<sub>14</sub>-H, C<sub>15</sub>-H),

1.17 (d,  $J = 6.9$  Hz, 6H, C<sub>12</sub>-H, C<sub>13</sub>-H). <sup>13</sup>C NMR (151 MHz, DMSO-*d*<sub>6</sub>):  $\delta$  172.66, 165.38, 162.35, 154.13, 138.56, 132.94, 129.73, 125.88, 125.17, 124.55, 116.36, 114.08, 55.83, 37.60, 35.89, 33.32, 30.28, 28.13, 24.80. MS(ESI)  $m/z$ : 421.23 ( [M+Na]<sup>+</sup>). Anal. Calcd. For C<sub>23</sub>H<sub>30</sub>N<sub>2</sub>O<sub>4</sub>: C, 69.32; H, 7.59; N, 7.03; Found: C, 69.36; H, 7.57; N, 7.04.

**2-bromo-N'-(4-(2-hydroxy-5-isopropylphenyl)-4-methylpentanoyl)benzohydrazide (5e).** The product is obtained as a white powder, yield 78.2%, mp 132.5-132.8°C. FT-IR  $\nu$  (cm<sup>-1</sup>): 3295, 3187(N-H, O-H), 3009 (Ar-H), 2960, 2928, 2868 (C-H), 1693 (C=O), 1505, 1462, 1421 (Ar), 1291, 1223, 1129, 1078 (C-N). <sup>1</sup>H NMR (600 MHz, CDCl<sub>3</sub>):  $\delta$  9.23 (s, 1H, -NH), 9.10 (s, 1H, -NH), 7.55 (d,  $J = 7.6$  Hz, 1H, C<sub>22</sub>-H), 7.46 (d,  $J = 7.0$  Hz, 1H, C<sub>19</sub>-H), 7.28 (d,  $J = 7.5$  Hz, 2H, C<sub>20</sub>-H, C<sub>21</sub>-H), 6.99 (s, 1H, C<sub>6</sub>-H), 6.88 (d,  $J = 8.0$  Hz, 1H, C<sub>8</sub>-H), 6.68 – 6.59 (m, 2H, C<sub>9</sub>-H, -OH), 2.80 (dt,  $J = 13.8, 6.9$  Hz, 1H, C<sub>11</sub>-H), 2.27 – 2.20 (m, 2H, C<sub>2</sub>-H), 1.99 (d,  $J = 7.2$  Hz, 2H, C<sub>3</sub>-H), 1.35 (s, 6H, C<sub>14</sub>-H, C<sub>15</sub>-H), 1.20 (d,  $J = 6.9$  Hz, 6H, C<sub>12</sub>-H, C<sub>13</sub>-H). <sup>13</sup>C NMR (151 MHz, CDCl<sub>3</sub>):  $\delta$  171.81, 164.23, 152.46, 140.43, 134.23, 133.58, 132.72, 132.05, 129.97, 127.48, 126.32, 124.76, 120.03, 116.86, 37.88, 36.14, 33.53, 31.02, 28.22, 24.35. MS(ESI)  $m/z$ : 469.17 ( [M+Na]<sup>+</sup>). Anal. Calcd. For C<sub>22</sub>H<sub>27</sub>BrN<sub>2</sub>O<sub>3</sub>: C, 59.07; H, 6.08; N, 6.26; Found: C, 59.07; H, 6.04; N, 6.27.

**4-bromo-N'-(4-(2-hydroxy-5-isopropylphenyl)-4-methylpentanoyl)benzohydrazide (5f).** The product is obtained as a white powder, yield 77.6%, mp 100.5-100.7°C. FT-IR  $\nu$  (cm<sup>-1</sup>): 3381, 3259 (N-H, O-H), 3033 (Ar-H), 2958, 2925, 2868 (C-H), 1688 (C=O), 1504, 1479, 1420 (Ar), 1298, 1251, 1218, 1080 (C-N). <sup>1</sup>H NMR (600 MHz,

CDCl<sub>3</sub>):  $\delta$  9.86 (s, 1H, -NH), 8.97 (s, 1H, -NH), 7.54 (d,  $J$  = 8.4 Hz, 2H, C<sub>18</sub>-H, C<sub>22</sub>-H), 7.40 (d,  $J$  = 8.4 Hz, 2H, C<sub>19</sub>-H, C<sub>21</sub>-H), 6.96 (s, 1H, C<sub>6</sub>-H), 6.87 – 6.82 (m, 2H, C<sub>8</sub>-H, -OH), 6.60 (d,  $J$  = 8.1 Hz, 1H, C<sub>9</sub>-H), 2.78 (dt,  $J$  = 13.8, 6.9 Hz, 1H, C<sub>11</sub>-H), 2.23 – 2.17 (m, 2H, C<sub>2</sub>-H), 1.95 – 1.90 (m, 2H, C<sub>3</sub>-H), 1.29 (s, 6H, C<sub>14</sub>-H, C<sub>15</sub>-H), 1.18 (d,  $J$  = 6.9 Hz, 6H, C<sub>12</sub>-H, C<sub>13</sub>-H). <sup>13</sup>C NMR (151 MHz, CDCl<sub>3</sub>):  $\delta$  173.89, 164.81, 152.42, 140.41, 132.65, 131.82, 129.70, 128.92, 127.34, 126.33, 124.73, 116.68, 37.86, 36.37, 33.51, 31.11, 28.13, 24.33. MS(ESI)  $m/z$ : 469.15 ( [M+Na]<sup>+</sup>). Anal. Calcd. For C<sub>22</sub>H<sub>27</sub>BrN<sub>2</sub>O<sub>3</sub>: C, 59.07; H, 6.08; N, 6.26; Found: C, 59.07; H, 6.08; N, 6.29.

***4-fluoro-N'-(4-(2-hydroxy-5-isopropylphenyl)-4-methylpentanoyl)benzohydrazide (5g)***. The product is obtained as a white powder, yield 76.3%, mp 86.0-86.3°C. FT-IR  $\nu$  (cm<sup>-1</sup>): 3378, 3267 (N-H, O-H), 3024 (Ar-H), 2959, 2928, 2869 (C-H), 1688 (C=O), 1501, 1462, 1420 (Ar), 1238, 1160, 1082 (C-N). <sup>1</sup>H NMR (600 MHz, CDCl<sub>3</sub>):  $\delta$  9.86 (d,  $J$  = 3.0 Hz, 1H, -NH), 9.01 (d,  $J$  = 2.9 Hz, 1H, -NH), 7.71 (dd,  $J$  = 8.5, 5.3 Hz, 2H, C<sub>18</sub>-H, C<sub>22</sub>-H), 6.96 – 6.91 (m, 3H, C<sub>19</sub>-H, C<sub>21</sub>-H, -OH), 6.89 (s, 1H, C<sub>6</sub>-H), 6.82 (dd,  $J$  = 8.1, 1.6 Hz, 1H, C<sub>8</sub>-H), 6.60 (d,  $J$  = 8.1 Hz, 1H, C<sub>9</sub>-H), 2.78 (dt,  $J$  = 13.8, 6.9 Hz, 1H, C<sub>11</sub>-H), 2.23 - 2.17 (m, 2H, C<sub>2</sub>-H), 1.95 – 1.89 (m, 2H, C<sub>3</sub>-H), 1.28 (s, 6H, C<sub>14</sub>-H, C<sub>15</sub>-H), 1.18 (d,  $J$  = 6.9 Hz, 6H, C<sub>12</sub>-H, C<sub>13</sub>-H). <sup>13</sup>C NMR (151 MHz, CDCl<sub>3</sub>):  $\delta$  173.98, 166.02, 164.78, 164.33, 152.47, 140.38, 132.66, 129.91, 127.09, 126.30, 124.70, 116.69, 115.76, 115.61, 37.84, 36.38, 33.50, 31.10, 28.10, 24.30. MS(ESI)  $m/z$ : 409.22 ( [M+Na]<sup>+</sup>). Anal. Calcd. For C<sub>22</sub>H<sub>27</sub>FN<sub>2</sub>O<sub>3</sub>: C, 68.37; H, 7.04; N, 7.25; Found: C, 68.34; H, 7.04; N, 7.27.

***2-fluoro-N'-(4-(2-hydroxy-5-isopropylphenyl)-4-methylpentanoyl)benzohydrazide (5h)***. The product is obtained as a white powder, yield 78.5%, mp 143.4-143.6°C. FT-IR  $\nu$  ( $\text{cm}^{-1}$ ): 3427, 3331, 3243 (N-H, O-H), 3047 (Ar-H), 2959, 2923, 2865 (C-H), 1686 (C=O), 1507, 1484, 1451, 1422 (Ar), 1317, 1263, 1214, 1087 (C-N).  $^1\text{H}$  NMR (600 MHz,  $\text{CDCl}_3$ ):  $\delta$  9.72 (d,  $J = 3.5$  Hz, 1H, -NH), 9.37 (dd,  $J = 11.9, 4.9$  Hz, 1H, -NH), 7.91 (td,  $J = 7.7, 1.7$  Hz, 1H,  $\text{C}_{22}$ -H), 7.53 – 7.46 (m, 1H,  $\text{C}_{19}$ -H), 7.25 – 7.19 (m, 1H,  $\text{C}_{20}$ -H), 7.13 (dd,  $J = 11.8, 8.3$  Hz, 1H,  $\text{C}_{21}$ -H), 6.94 (d,  $J = 2.0$  Hz, 1H,  $\text{C}_6$ -H), 6.68 (dd,  $J = 8.1, 2.0$  Hz, 1H,  $\text{C}_8$ -H), 6.62 (d,  $J = 8.1$  Hz, 1H,  $\text{C}_9$ -H), 6.49 (d,  $J = 8.3$  Hz, 1H, -OH), 2.71 (dt,  $J = 13.8, 6.9$  Hz, 1H,  $\text{C}_{11}$ -H), 2.32 – 2.24 (m, 2H,  $\text{C}_2$ -H), 2.03 – 1.97 (m, 2H,  $\text{C}_3$ -H), 1.35 (s, 6H,  $\text{C}_{14}$ -H,  $\text{C}_{15}$ -H), 1.12 (d,  $J = 6.9$  Hz, 6H,  $\text{C}_{12}$ -H,  $\text{C}_{13}$ -H).  $^{13}\text{C}$  NMR (151 MHz,  $\text{CDCl}_3$ ):  $\delta$  171.93, 161.37, 160.02, 159.71, 152.52, 140.05, 134.21, 132.65, 131.79, 126.19, 124.90, 124.54, 118.36, 116.50, 116.24, 116.08, 37.74, 36.04, 33.43, 30.86, 28.13, 24.25. MS(ESI)  $m/z$ : 409.22 (  $[\text{M}+\text{Na}]^+$ ). Anal. Calcd. For  $\text{C}_{22}\text{H}_{27}\text{FN}_2\text{O}_3$ : C, 68.37; H, 7.04; N, 7.25; Found: C, 68.35; H, 7.04; N, 7.24.

***N'-(4-(2-hydroxy-5-isopropylphenyl)-4-methylpentanoyl)-2-(trifluoromethyl)benzohydrazide (5i)***. The product is obtained as a white powder, yield 77.6%, mp 116.1-116.4°C. FT-IR  $\nu$  ( $\text{cm}^{-1}$ ): 3390, 3265 (N-H, O-H), 3036 (Ar-H), 2960, 2925, 2870 (C-H), 1697 (C=O), 1506, 1482, 1421 (Ar), 1315, 1174, 1131, 1034 (C-N).  $^1\text{H}$  NMR (600 MHz,  $\text{CDCl}_3$ ):  $\delta$  9.14 (d,  $J = 3.5$  Hz, 1H, -NH), 8.99 (d,  $J = 3.6$  Hz, 1H, -NH), 7.68 (d,  $J = 7.3$  Hz, 1H,  $\text{C}_{22}$ -H), 7.57 – 7.49 (m, 3H,  $\text{C}_{19}$ -H,  $\text{C}_{20}$ -H,  $\text{C}_{21}$ -H), 7.01 (d,  $J = 1.9$  Hz, 1H,  $\text{C}_6$ -H), 6.90 (dd,  $J = 8.1, 1.9$  Hz, 1H,  $\text{C}_8$ -H), 6.65 (d,  $J = 8.1$  Hz,

2H, C<sub>9</sub>-H, -OH), 2.83 (dt,  $J = 13.8, 6.9$  Hz, 1H, C<sub>11</sub>-H), 2.26 – 2.19 (m, 2H, C<sub>2</sub>-H), 2.01 – 1.94 (m, 2H, C<sub>3</sub>-H), 1.35 (s, 6H, C<sub>14</sub>-H, C<sub>15</sub>-H), 1.22 (d,  $J = 6.9$  Hz, 6H, C<sub>12</sub>-H, C<sub>13</sub>-H). <sup>13</sup>C NMR (151 MHz, CDCl<sub>3</sub>):  $\delta$  172.33, 165.07, 152.50, 140.42, 132.67, 132.48 – 131.83, 130.67, 129.01, 128.19, 127.97, 126.58, 126.28, 124.74, 124.17, 122.35, 116.81, 37.83, 36.01, 33.52, 30.93, 29.71, 28.14, 24.31. MS(ESI)  $m/z$ : 459.21 ([M+H]<sup>+</sup>). Anal. Calcd. For C<sub>23</sub>H<sub>27</sub>F<sub>3</sub>N<sub>2</sub>O<sub>3</sub>: C, 63.29; H, 6.24; N, 6.42; Found: C, 63.26; H, 6.25; N, 6.44.

***N'-(4-(2-hydroxy-5-isopropylphenyl)-4-methylpentanoyl)-2-nitrobenzohydrazide (5j)***. The product is obtained as a white powder, yield 77.9%, mp 161.4-161.7°C. FT-IR  $\nu$  (cm<sup>-1</sup>): 3454 (N-H, O-H), 3024 (Ar-H), 2961, 2922, 2868 (C-H), 1661 (C=O), 1523, 1361 (-NO<sub>2</sub>), 1503, 1469, 1423 (Ar), 1248, 1201, 1130, 1079 (C-N). <sup>1</sup>H NMR (600 MHz, DMSO-*d*<sub>6</sub>):  $\delta$  10.42 (s, 1H, -NH), 9.97 (s, 1H, -NH), 9.10 (s, 1H, -OH), 8.08 – 8.05 (m, 1H, C<sub>19</sub>-H), 7.83 (td,  $J = 7.6, 0.8$  Hz, 1H, C<sub>20</sub>-H), 7.74 (td,  $J = 8.1, 1.2$  Hz, 1H, C<sub>21</sub>-H), 7.66 (dd,  $J = 7.5, 1.0$  Hz, 1H, C<sub>22</sub>-H), 6.95 (d,  $J = 1.9$  Hz, 1H, C<sub>6</sub>-H), 6.89 (dd,  $J = 8.1, 2.0$  Hz, 1H, C<sub>8</sub>-H), 6.70 (d,  $J = 8.1$  Hz, 1H, C<sub>9</sub>-H), 2.78 (dt,  $J = 13.8, 6.9$  Hz, 1H, C<sub>11</sub>-H), 2.10 (dd,  $J = 10.4, 6.6$  Hz, 2H, C<sub>2</sub>-H), 1.89 (dd,  $J = 10.4, 6.6$  Hz, 2H, C<sub>3</sub>-H), 1.34 (s, 6H, C<sub>14</sub>-H, C<sub>15</sub>-H), 1.17 (d,  $J = 6.9$  Hz, 6H, C<sub>12</sub>-H, C<sub>13</sub>-H). <sup>13</sup>C NMR (151 MHz, DMSO-*d*<sub>6</sub>):  $\delta$  172.32, 164.77, 154.11, 147.67, 138.57, 134.11, 132.94, 131.82, 130.84, 129.95, 125.88, 124.70, 124.55, 116.37, 39.45 – 39.11, 37.60, 35.83, 33.32, 30.15, 28.08, 24.79. MS(ESI)  $m/z$ : 436.21 ([M+Na]<sup>+</sup>). Anal. Calcd. For C<sub>22</sub>H<sub>27</sub>N<sub>3</sub>O<sub>5</sub>: C, 63.91; H, 6.58; N, 10.16; Found: C, 63.93; H, 6.55; N, 10.17.

***2-chloro-N'-(4-(2-hydroxy-5-isopropylphenyl)-4-methylpentanoyl)benzohydrazide***



*de* (**5k**). The product is obtained as a white powder, yield 75.7%, mp 109.5-109.7°C. FT-IR  $\nu$  (cm<sup>-1</sup>): 3438, 3263 (N-H, O-H), 3032 (Ar-H), 2956, 2925, 2868 (C-H), 1706 (C=O), 1508, 1421, 1364 (Ar), 1293, 1251, 1208, 1081 (C-N). <sup>1</sup>H NMR (600 MHz, CDCl<sub>3</sub>):  $\delta$  9.49 (d,  $J$  = 8.4 Hz, 1H, -NH), 9.33 (d,  $J$  = 11.3 Hz, 1H, -NH), 7.56 (d,  $J$  = 7.7 Hz, 1H, C<sub>22</sub>-H), 7.36 (q,  $J$  = 8.0 Hz, 2H, C<sub>19</sub>-H, C<sub>20</sub>-H), 7.27 – 7.23 (m, 1H, C<sub>21</sub>-H), 7.00 (d,  $J$  = 1.9 Hz, 1H, C<sub>6</sub>-H), 6.87 (dd,  $J$  = 8.1, 1.9 Hz, 1H, C<sub>8</sub>-H), 6.73 (s, 1H, -OH), 6.67 (d,  $J$  = 8.1 Hz, 1H, C<sub>9</sub>-H), 2.82 (dt,  $J$  = 13.8, 6.9 Hz, 1H, C<sub>11</sub>-H), 2.26 (dd,  $J$  = 9.8, 6.8 Hz, 2H, C<sub>2</sub>-H), 2.02 (dd,  $J$  = 9.8, 6.7 Hz, 2H, C<sub>3</sub>-H), 1.36 (s, 6H, C<sub>14</sub>-H, C<sub>15</sub>-H), 1.21 (d,  $J$  = 6.9 Hz, 6H, C<sub>12</sub>-H, C<sub>13</sub>-H). <sup>13</sup>C NMR (151 MHz, CDCl<sub>3</sub>):  $\delta$  171.92, 163.26, 152.56, 140.27, 132.69, 132.07, 131.67, 131.48, 130.38, 126.98, 126.26, 124.72, 116.78, 37.83, 36.16, 33.52, 30.96, 28.19, 24.34. MS(ESI)  $m/z$ : 403.32 ([M+H]<sup>+</sup>). Anal. Calcd. For C<sub>22</sub>H<sub>27</sub>ClN<sub>2</sub>O<sub>3</sub>: C, 65.58; H, 6.75; N, 6.95; Found: C, 65.57; H, 6.73; N, 6.96.

***3-chloro-N'-(4-(2-hydroxy-5-isopropylphenyl)-4-methylpentanoyl)benzohydrazide***

*de* (**5l**). The product is obtained as a white powder, yield: 77.5%, mp 153.0-153.2°C. FT-IR  $\nu$  (cm<sup>-1</sup>): 3437, 3261 (N-H, O-H), 3033 (Ar-H), 2959, 2925, 2869 (C-H), 1706 (C=O), 1507, 1466, 1420 (Ar), 1293, 1253, 1217, 1081 (C-N). <sup>1</sup>H NMR (600 MHz, CDCl<sub>3</sub>):  $\delta$  9.99 (d,  $J$  = 3.4 Hz, 1H, -NH), 9.06 (d,  $J$  = 3.4 Hz, 1H, -NH), 7.68 (s, 1H, C<sub>18</sub>-H), 7.57 (d,  $J$  = 7.8 Hz, 1H, C<sub>22</sub>-H), 7.40 (dd,  $J$  = 8.0, 1.1 Hz, 1H, C<sub>20</sub>-H), 7.20 (t,  $J$  = 7.9 Hz, 1H, C<sub>21</sub>-H), 6.95 (d,  $J$  = 1.9 Hz, 1H, C<sub>6</sub>-H), 6.82 (dd,  $J$  = 8.1, 1.9 Hz, 1H, C<sub>8</sub>-H), 6.73 (s, 1H, -OH), 6.60 (d,  $J$  = 8.1 Hz, 1H, C<sub>9</sub>-H), 2.78 (dt,  $J$  = 13.8, 6.9 Hz, 1H, C<sub>11</sub>-H), 2.20 (dd,  $J$  = 9.8, 6.8 Hz, 2H, C<sub>2</sub>-H), 1.93 (dd,  $J$  = 9.7, 6.8 Hz, 2H,

C3-H), 1.28 (s, 6H, C14-H, C15-H), 1.18 (d,  $J = 6.9$  Hz, 6H, C12-H, C13-H).  $^{13}\text{C}$  NMR (151 MHz,  $\text{CDCl}_3$ ):  $\delta$  173.82, 164.30, 152.43, 140.38, 134.82, 132.63, 132.38, 129.87, 127.89, 126.30, 125.28, 124.72, 116.72, 37.85, 36.36, 33.50, 31.12, 28.13, 24.32. MS(ESI)  $m/z$ : 403.22 ( $[\text{M}+\text{H}]^+$ ). Anal. Calcd. For  $\text{C}_{22}\text{H}_{27}\text{ClN}_2\text{O}_3$ : C, 65.58; H, 6.75; N, 6.95; Found: C, 65.55; H, 6.75; N, 6.96.

***4-chloro-N'-(4-(2-hydroxy-5-isopropylphenyl)-4-methylpentanoyl)benzohydrazide (5m)***. The product is obtained as a white powder, yield 76.6%, mp 92.7-92.9°C. FT-IR  $\nu$  ( $\text{cm}^{-1}$ ): 3372, 3256 (N-H, O-H), 3036 (Ar-H), 2958, 2925, 2868 (C-H), 1691 (C=O), 1505, 1482, 1420 (Ar), 1251, 1095, 1082 (C-N).  $^1\text{H}$  NMR (600 MHz,  $\text{CDCl}_3$ ):  $\delta$  9.87 (s, 1H, -NH), 8.99 (s, 1H, -NH), 7.62 (d,  $J = 8.5$  Hz, 2H, C<sub>18</sub>-H, C<sub>22</sub>-H), 7.24 (d,  $J = 8.5$  Hz, 2H, C<sub>19</sub>-H, C<sub>21</sub>-H), 6.96 (d,  $J = 1.8$  Hz, 1H, C<sub>6</sub>-H), 6.87 (s, 1H, -OH), 6.83 (dd,  $J = 8.1, 1.9$  Hz, 1H, C<sub>8</sub>-H), 6.60 (d,  $J = 8.1$  Hz, 1H, C<sub>9</sub>-H), 2.78 (dt,  $J = 13.8, 6.9$  Hz, 1H, C<sub>11</sub>-H), 2.23 – 2.17 (m, 2H, C<sub>2</sub>-H), 1.95 – 1.90 (m, 2H, C<sub>3</sub>-H), 1.29 (s, 6H, C<sub>14</sub>-H, C<sub>15</sub>-H), 1.18 (d,  $J = 6.9$  Hz, 6H, C<sub>12</sub>-H, C<sub>13</sub>-H).  $^{13}\text{C}$  NMR (151 MHz,  $\text{CDCl}_3$ ):  $\delta$  173.90, 164.72, 152.43, 140.41, 138.77, 132.65, 129.25, 128.82, 126.32, 124.72, 116.68, 37.85, 36.37, 33.50, 31.11, 28.12, 24.31. MS(ESI)  $m/z$ : 425.20 ( $[\text{M}+\text{Na}]^+$ ). Anal. Calcd. For  $\text{C}_{22}\text{H}_{27}\text{ClN}_2\text{O}_3$ : C, 65.58; H, 6.75; N, 6.95; Found: C, 65.57; H, 6.74; N, 6.95.

***N'-(4-(2-hydroxy-5-isopropylphenyl)-4-methylpentanoyl)-4-methylbenzohydrazide (5n)***. The product is obtained as a white powder, yield 78.6%, mp 80.5-80.7°C. FT-IR  $\nu$  ( $\text{cm}^{-1}$ ): 3385, 3244 (N-H, O-H), 3028 (Ar-H), 2956, 2925, 2867 (C-H), 1681 (C=O), 1505, 1480, 1419 (Ar), 1341, 1248, 1193, 1031, 1081 (C-N).  $^1\text{H}$  NMR (600

MHz, CDCl<sub>3</sub>):  $\delta$  9.63 (d,  $J$  = 3.6 Hz, 1H, -NH), 9.19 (d,  $J$  = 3.6 Hz, 1H, -NH), 7.61 (d,  $J$  = 8.1 Hz, 2H, C<sub>18</sub>-H, C<sub>22</sub>-H), 7.08 (d,  $J$  = 8.1 Hz, 2H, C<sub>19</sub>-H, C<sub>21</sub>-H), 7.06 (s, 1H, -OH), 6.94 (d,  $J$  = 1.8 Hz, 1H, C<sub>6</sub>-H), 6.79 (dd,  $J$  = 8.1, 1.8 Hz, 1H, C<sub>8</sub>-H), 6.62 (d,  $J$  = 8.1 Hz, 1H, C<sub>9</sub>-H), 2.77 (dt,  $J$  = 13.8, 6.9 Hz, 1H, C<sub>11</sub>-H), 2.32 (s, 3H, C<sub>23</sub>-H), 2.23 – 2.18 (m, 2H, C<sub>2</sub>-H), 1.94 – 1.88 (m, 2H, C<sub>3</sub>-H), 1.28 (s, 6H, C<sub>14</sub>-H, C<sub>15</sub>-H), 1.17 (d,  $J$  = 6.9 Hz, 6H, C<sub>12</sub>-H, C<sub>13</sub>-H). <sup>13</sup>C NMR (151 MHz, CDCl<sub>3</sub>):  $\delta$  173.40, 165.62, 152.63, 142.88, 140.08, 132.73, 129.23, 128.24, 127.41, 126.21, 124.63, 116.77, 37.82, 36.37, 33.49, 31.10, 28.14, 24.31, 21.50. MS(ESI)  $m/z$ : 405.23 ( [M+Na]<sup>+</sup>). Anal. Calcd. For C<sub>23</sub>H<sub>30</sub>N<sub>2</sub>O<sub>3</sub>: C, 72.22; H, 7.91; N, 7.32; Found: C, 72.24; H, 7.92; N, 7.33.

***N'-(4-(2-hydroxy-5-isopropylphenyl)-4-methylpentanoyl)-2-methylbenzohydrazide (50)***. The product is obtained as a white powder, yield 78.4%, mp 127.5-127.8°C. FT-IR  $\nu$  (cm<sup>-1</sup>): 3392, 3253 (N-H, O-H), 3047 (Ar-H), 2960, 2928, 2872 (C-H), 1678 (C=O), 1506, 1455, 1421 (Ar), 1316, 1261, 1212, 1082 (C-N). <sup>1</sup>H NMR (600 MHz, CDCl<sub>3</sub>):  $\delta$  9.15 (s, 1H, -NH), 8.97 (s, 1H, -NH), 7.33 (d,  $J$  = 7.6 Hz, 1H, C<sub>22</sub>-H), 7.29 (t,  $J$  = 7.5 Hz, 1H, C<sub>20</sub>-H), 7.15 (d,  $J$  = 7.6 Hz, 1H, C<sub>19</sub>-H), 7.09 (t,  $J$  = 7.5 Hz, 1H, C<sub>21</sub>-H), 6.96 (s, 1H, C<sub>6</sub>-H), 6.89 (s, 1H, -OH), 6.82 (d,  $J$  = 8.0 Hz, 1H, C<sub>8</sub>-H), 6.59 (d,  $J$  = 8.0 Hz, 1H, C<sub>9</sub>-H), 2.79 (dt,  $J$  = 13.7, 6.9 Hz, 1H, C<sub>11</sub>-H), 2.32 (s, 3H, C<sub>23</sub>-H), 2.22 – 2.17 (m, 2H, C<sub>2</sub>-H), 1.98 – 1.89 (m, 2H, C<sub>3</sub>-H), 1.31 (s, 6H, C<sub>14</sub>-H, C<sub>15</sub>-H), 1.18 (d,  $J$  = 6.9 Hz, 6H, C<sub>12</sub>-H, C<sub>13</sub>-H). <sup>13</sup>C NMR (151 MHz, CDCl<sub>3</sub>):  $\delta$  172.49, 167.41, 152.62, 140.23, 137.16, 132.74, 132.34, 131.19, 130.87, 127.49, 126.24, 125.74, 124.68, 116.77, 37.80, 36.14, 33.52, 31.01, 28.19, 24.34, 19.84. MS(ESI)  $m/z$ :

405.24 ( [M+Na]<sup>+</sup>). Anal. Calcd. For C<sub>23</sub>H<sub>30</sub>N<sub>2</sub>O<sub>3</sub>: C, 72.22; H, 7.91; N, 7.32; Found: C, 72.22; H, 7.92; N, 7.32.

*N'-(4-(2-hydroxy-5-isopropylphenyl)-4-methylpentanoyl)-4-(hydroxymethyl)benzohydrazide (5p)*. The product is obtained as a white powder, yield 78.8%, mp 167.3-167.5°C. FT-IR  $\nu$  (cm<sup>-1</sup>): 3384, 3247 (N-H, O-H), 3107, 3033 (Ar-H), 2961, 2923, 2867 (C-H), 1698 (C=O), 1508, 1479, 1422, 1361 (Ar), 1253, 1212, 1082 (C-N). <sup>1</sup>H NMR (600 MHz, DMSO-*d*<sub>6</sub>):  $\delta$  10.16 (s, 1H, -NH), 9.69 (s, 1H, -NH), 9.13 (s, 1H, -OH), 7.81 (d, *J* = 8.2 Hz, 2H, C<sub>18</sub>-H, C<sub>22</sub>-H), 7.41 (d, *J* = 8.1 Hz, 2H, C<sub>19</sub>-H, C<sub>21</sub>-H), 6.96 (d, *J* = 1.8 Hz, 1H, C<sub>6</sub>-H), 6.89 (dd, *J* = 8.1, 1.9 Hz, 1H, C<sub>8</sub>-H), 6.70 (d, *J* = 8.1 Hz, 1H, C<sub>9</sub>-H), 5.37 (t, *J* = 5.7 Hz, 1H, -OH), 4.56 (d, *J* = 5.6 Hz, 2H, C<sub>23</sub>-H), 2.78 (dt, *J* = 13.7, 6.9 Hz, 1H, C<sub>11</sub>-H), 2.11 (dd, *J* = 10.4, 6.5 Hz, 2H, C<sub>2</sub>-H), 1.88 (dd, *J* = 10.4, 6.5 Hz, 2H, C<sub>3</sub>-H), 1.34 (s, 6H, C<sub>14</sub>-H, C<sub>15</sub>-H), 1.17 (d, *J* = 6.9 Hz, 6H, C<sub>12</sub>-H, C<sub>13</sub>-H). <sup>13</sup>C NMR (151 MHz, DMSO-*d*<sub>6</sub>):  $\delta$  172.68, 165.86, 154.11, 146.90, 138.60, 132.95, 131.32, 127.72, 126.54, 125.89, 124.57, 116.36, 62.88, 37.59, 35.86, 33.31, 30.27, 28.11, 24.79. MS(ESI) *m/z*: 421.25 ( [M+Na]<sup>+</sup>). Anal. Calcd. For C<sub>23</sub>H<sub>30</sub>N<sub>2</sub>O<sub>4</sub>: C, 69.32; H, 7.59; N, 7.03; Found: C, 69.34; H, 7.57; N, 7.04.

*4-(tert-butyl)-N'-(4-(2-hydroxy-5-isopropylphenyl)-4-methylpentanoyl)benzohydrazide (5q)*. The product is obtained as a white powder, yield: 76.8%, mp 97.7-97.9°C. FT-IR  $\nu$  (cm<sup>-1</sup>): 3372, 3258 (N-H, O-H), 3036 (Ar-H), 2961, 2931, 2908, 2869 (C-H), 1688 (C=O), 1505, 1420, 1364 (Ar), 1255, 1125, 1082 (C-N). <sup>1</sup>H NMR (600 MHz, CDCl<sub>3</sub>):  $\delta$  9.68 (d, *J* = 3.6 Hz, 1H, -NH), 9.19 (d, *J* = 3.6 Hz, 1H, -NH), 7.66 (d, *J* = 8.4 Hz, 2H, C<sub>18</sub>-H, C<sub>22</sub>-H), 7.30 (d, *J* = 8.4 Hz, 2H, C<sub>19</sub>-H, C<sub>21</sub>-H), 7.08 (s,

1H, -OH), 6.94 (d,  $J = 1.7$  Hz, 1H, C<sub>6</sub>-H), 6.78 (dd,  $J = 8.1, 1.8$  Hz, 1H, C<sub>8</sub>-H), 6.63 (d,  $J = 8.1$  Hz, 1H, C<sub>9</sub>-H), 2.76 (dt,  $J = 13.8, 6.9$  Hz, 1H, C<sub>11</sub>-H), 2.22 (dd,  $J = 9.8, 6.8$  Hz, 2H, C<sub>2</sub>-H), 1.94 – 1.88 (m, 2H, C<sub>3</sub>-H), 1.28 (s, 6H, C<sub>14</sub>-H, C<sub>15</sub>-H), 1.27 (s, 9H, C<sub>24</sub>-H, C<sub>25</sub>-H, C<sub>26</sub>-H), 1.16 (d,  $J = 6.9$  Hz, 6H, C<sub>12</sub>-H, C<sub>13</sub>-H). <sup>13</sup>C NMR (151 MHz, CDCl<sub>3</sub>):  $\delta$  173.52, 165.52, 155.84, 152.64, 140.05, 132.72, 128.12, 127.26, 126.20, 125.52, 124.63, 116.78, 37.83, 36.38, 34.95, 33.49, 31.08, 28.17, 24.33. MS(ESI)  $m/z$ : 425.35 ([M+H]<sup>+</sup>). Anal. Calcd. For C<sub>26</sub>H<sub>36</sub>N<sub>2</sub>O<sub>3</sub>: C, 73.55; H, 8.55; N, 6.60; Found: C, 73.52; H, 8.53; N, 6.61.

***N'*-(4-(2-hydroxy-5-isopropylphenyl)-4-methylpentanoyl)benzohydrazide**

(**5r**). The product is obtained as a white powder, yield 78.7%, mp 178.4-178.7°C. FT-IR  $\nu$  (cm<sup>-1</sup>): 3381, 3318, 3244 (N-H, O-H), 3053, 3027 (Ar-H), 2959, 2928, 2868 (C-H), 1685 (C=O), 1508, 1485, 1420 (Ar), 1256, 1218, 1081 (C-N). <sup>1</sup>H NMR (600 MHz, DMSO-*d*<sub>6</sub>):  $\delta$  10.21 (s, 1H, -NH), 9.71 (s, 1H, -NH), 9.10 (s, 1H, -OH), 7.85 (d,  $J = 7.7$  Hz, 2H, C<sub>18</sub>-H, C<sub>22</sub>-H), 7.56 (t,  $J = 7.2$  Hz, 1H, C<sub>20</sub>-H), 7.48 (t,  $J = 7.5$  Hz, 2H, C<sub>19</sub>-H, C<sub>21</sub>-H), 6.96 (s, 1H, C<sub>6</sub>-H), 6.89 (d,  $J = 8.0$  Hz, 1H, C<sub>8</sub>-H), 6.71 (d,  $J = 8.1$  Hz, 1H, C<sub>9</sub>-H), 2.79 (dt,  $J = 13.7, 6.8$  Hz, 1H, C<sub>11</sub>-H), 2.12 (dd,  $J = 10.3, 6.5$  Hz, 2H, C<sub>2</sub>-H), 1.89 (dd,  $J = 10.4, 6.5$  Hz, 2H, C<sub>3</sub>-H), 1.35 (s, 6H, C<sub>14</sub>-H, C<sub>15</sub>-H), 1.17 (d,  $J = 6.9$  Hz, 6H, C<sub>12</sub>-H, C<sub>13</sub>-H). <sup>13</sup>C NMR (151 MHz, DMSO-*d*<sub>6</sub>):  $\delta$  172.63, 154.15, 138.58, 132.99, 132.18, 128.87, 127.85, 125.90, 124.57, 116.38, 37.61, 35.87, 33.33, 30.28, 28.14, 24.81. MS(ESI)  $m/z$ : 369.28 ([M+H]<sup>+</sup>). Anal. Calcd. For C<sub>22</sub>H<sub>28</sub>N<sub>2</sub>O<sub>3</sub>: C, 71.71; H, 7.66; N, 7.60; Found: C, 71.74; H, 7.65; N, 7.62.

***N'*-acetyl-4-(2-hydroxy-5-isopropylphenyl)-4-methylpentanehydrazide (5s)**. The

product is obtained as a white powder, yield 77.7%, mp 130.7-131.0°C. FT-IR  $\nu$  ( $\text{cm}^{-1}$ ): 3357, 3268 (N-H, O-H), 3039 (Ar-H), 2959, 2930, 2869 (C-H), 1692 (C=O), 1504, 1421, 1370 (Ar), 1253, 1220, 1081(C-N).  $^1\text{H}$  NMR (600 MHz, DMSO- $d_6$ ):  $\delta$  9.60 (s, 1H, -NH), 9.51 (s, 1H, -NH), 9.09 (s, 1H, -OH), 6.93 (d,  $J = 2.0$  Hz, 1H, C<sub>6</sub>-H), 6.87 (dd,  $J = 8.1, 2.1$  Hz, 1H, C<sub>8</sub>-H), 6.69 (d,  $J = 8.1$  Hz, 1H, C<sub>9</sub>-H), 2.77 (dt,  $J = 13.7, 6.9$  Hz, 1H, C<sub>11</sub>-H), 2.11 – 2.01 (m, 2H, C<sub>2</sub>-H), 1.81 (s, 3H, C<sub>17</sub>-H), 1.79 (d,  $J = 8.4$  Hz, 2H, C<sub>3</sub>-H), 1.31 (s, 6H, C<sub>14</sub>-H, C<sub>15</sub>-H), 1.15 (d,  $J = 6.9$  Hz, 6H, C<sub>12</sub>-H, C<sub>13</sub>-H).  $^{13}\text{C}$  NMR (151 MHz, DMSO- $d_6$ ):  $\delta$  172.11, 168.49, 154.09, 138.55, 132.94, 125.85, 124.53, 116.34, 37.57, 35.83, 33.31, 30.08, 28.09, 24.78, 20.92. MS(ESI)  $m/z$ : 307.24 ( $[\text{M}+\text{H}]^+$ ). Anal. Calcd. For C<sub>17</sub>H<sub>26</sub>N<sub>2</sub>O<sub>3</sub>: C, 66.64; H, 8.55; N, 9.14; Found: C, 66.66; H, 8.55; N, 9.17.

***4-(2-hydroxy-5-isopropylphenyl)-4-methyl-N'-(2-phenylacetyl)pentanehydrazid***

**e (5t).** The product is obtained as a white powder, yield 77.9%, mp 82.3-82.5°C. FT-IR  $\nu$  ( $\text{cm}^{-1}$ ): 3398, 3262 (N-H, O-H), 3031 (Ar-H), 2958, 2925, 2868 (C-H), 1691 (C=O), 1508, 1458, 1420 (Ar), 1253, 1209, 1080 (C-N).  $^1\text{H}$  NMR (600 MHz, CDCl<sub>3</sub>):  $\delta$  9.33 (s, 1H, -NH), 8.88 (d,  $J = 3.4$  Hz, 1H, -NH), 7.21 (t,  $J = 7.2$  Hz, 3H, C<sub>19</sub>-H, C<sub>20</sub>-H, C<sub>21</sub>-H), 7.19 – 7.16 (m, 2H, C<sub>22</sub>-H, C<sub>23</sub>-H), 6.95 (d,  $J = 1.6$  Hz, 1H, C<sub>6</sub>-H), 6.82 (dd,  $J = 8.1, 1.8$  Hz, 1H, C<sub>8</sub>-H), 6.76 (s, 1H, -OH), 6.55 (d,  $J = 8.1$  Hz, 1H, C<sub>9</sub>-H), 3.46 (s, 2H, C<sub>17</sub>-H), 2.78 (dt,  $J = 13.8, 6.9$  Hz, 1H, C<sub>11</sub>-H), 2.18 (dd,  $J = 9.7, 6.8$  Hz, 2H, C<sub>2</sub>-H), 1.88 – 1.84 (m, 2H, C<sub>3</sub>-H), 1.31 (s, 6H, C<sub>14</sub>-H, C<sub>15</sub>-H), 1.18 (d,  $J = 6.9$  Hz, 6H, C<sub>12</sub>-H, C<sub>13</sub>-H).  $^{13}\text{C}$  NMR (151 MHz, CDCl<sub>3</sub>):  $\delta$  172.41, 168.96, 152.56, 140.26, 133.83, 132.67, 129.33, 128.77, 127.35, 126.30, 124.69, 116.70, 40.87, 37.81, 36.21,

33.52, 30.95, 28.19, 24.35. MS(ESI)  $m/z$ : 383.29 ( [M+H]<sup>+</sup>). Anal. Calcd. For C<sub>23</sub>H<sub>30</sub>N<sub>2</sub>O<sub>3</sub>: C, 72.22; H, 7.91; N, 7.32; Found: C, 72.24; H, 7.93; N, 7.34.

***N'-(2-cyanoacetyl)-4-(2-hydroxy-5-isopropylphenyl)-4-methylpentanehydrazide***

(**5u**). The product is obtained as a white powder, yield 77.4%, mp 119.2-119.5°C. FT-IR  $\nu$  (cm<sup>-1</sup>): 3509, 3429, 3306, 3270 (N-H, O-H), 3110, 3025 (Ar-H), 2962, 2922, 2867 (C-H), 2271 (C≡N), 1696 (C=O), 1505, 1421, 1363, 1349 (Ar), 1254, 1203, 1134, 1081 (C-N). <sup>1</sup>H NMR (600 MHz, DMSO-*d*<sub>6</sub>):  $\delta$  10.08 (s, 1H, -NH), 9.80 (s, 1H, -NH), 9.09 (s, 1H, -OH), 6.93 (d,  $J$  = 1.9 Hz, 1H, C<sub>6</sub>-H), 6.88 (dd,  $J$  = 8.1, 2.0 Hz, 1H, C<sub>8</sub>-H), 6.69 (d,  $J$  = 8.1 Hz, 1H, C<sub>9</sub>-H), 3.70 (s, 2H, C<sub>17</sub>-H), 2.77 (dt,  $J$  = 13.8, 6.9 Hz, 1H, C<sub>11</sub>-H), 2.11 – 2.02 (m, 2H, C<sub>2</sub>-H), 1.82 (dd,  $J$  = 10.3, 6.6 Hz, 2H, C<sub>3</sub>-H), 1.32 (s, 6H, C<sub>14</sub>-H, C<sub>15</sub>-H), 1.16 (d,  $J$  = 6.9 Hz, 6H, C<sub>12</sub>-H, C<sub>13</sub>-H); <sup>13</sup>C NMR (151 MHz, DMSO-*d*<sub>6</sub>):  $\delta$  172.04, 161.67, 154.08, 138.57, 132.86, 125.86, 124.57, 116.35, 116.10, 37.58, 35.74, 33.30, 30.03, 28.08, 24.77, 24.14. MS(ESI)  $m/z$ : 354.19 ( [M+Na]<sup>+</sup>). Anal. Calcd. For C<sub>18</sub>H<sub>25</sub>N<sub>3</sub>O<sub>3</sub>: C, 65.23; H, 7.60; N, 12.68; Found: C, 65.25; H, 7.64; N, 12.67.

***N'-(4-(2-hydroxy-5-isopropylphenyl)-4-methylpentanoyl)furan-2-carbohydrazide***

(**5v**). The product is obtained as a white powder, yield 77.2%, mp 150.0-150.3°C. FT-IR  $\nu$  (cm<sup>-1</sup>): 3372, 3260 (N-H, O-H), 3036 (Ar-H), 2958, 2928, 2868 (C-H), 1688 (C=O), 1507, 1467, 1420 (Ar), 1295, 1253, 1220, 1080 (C-N). <sup>1</sup>H NMR (600 MHz, CDCl<sub>3</sub>):  $\delta$  9.56 (s, 1H, -NH), 9.25 (s, 1H, -NH), 7.33 (s, 1H, -OH), 7.05 (d,  $J$  = 3.4 Hz, 1H, C<sub>18</sub>-H), 7.02 (s, 1H, C<sub>20</sub>-H), 6.93 (d,  $J$  = 1.4 Hz, 1H, C<sub>6</sub>-H), 6.78 (dd,  $J$  = 8.0, 1.5 Hz, 1H, C<sub>8</sub>-H), 6.64 (d,  $J$  = 8.1 Hz, 1H, C<sub>9</sub>-H), 6.38 (dd,  $J$  = 3.2, 1.4 Hz, 1H, C<sub>19</sub>-H),

2.76 (dt,  $J = 13.7, 6.9$  Hz, 1H, C<sub>11</sub>-H), 2.21 (dd,  $J = 10.0, 6.7$  Hz, 2H, C<sub>2</sub>-H), 1.92 (dd,  $J = 9.9, 6.8$  Hz, 2H, C<sub>3</sub>-H), 1.29 (s, 6H, C<sub>14</sub>-H, C<sub>15</sub>-H), 1.17 (d,  $J = 6.9$  Hz, 6H, C<sub>12</sub>-H, C<sub>13</sub>-H). <sup>13</sup>C NMR (151 MHz, CDCl<sub>3</sub>):  $\delta$  173.87, 156.71, 152.66, 145.30, 140.01, 132.67, 126.20, 124.50, 116.66, 116.17, 112.06, 37.78, 36.29, 33.48, 31.02, 28.10, 24.32. MS(ESI)  $m/z$ : 381.20 ( [M+Na]<sup>+</sup>). Anal. Calcd. For C<sub>20</sub>H<sub>26</sub>N<sub>2</sub>O<sub>4</sub>: C, 67.02; H, 7.31; N, 7.82; Found: C, 67.04; H, 7.30; N, 7.85.

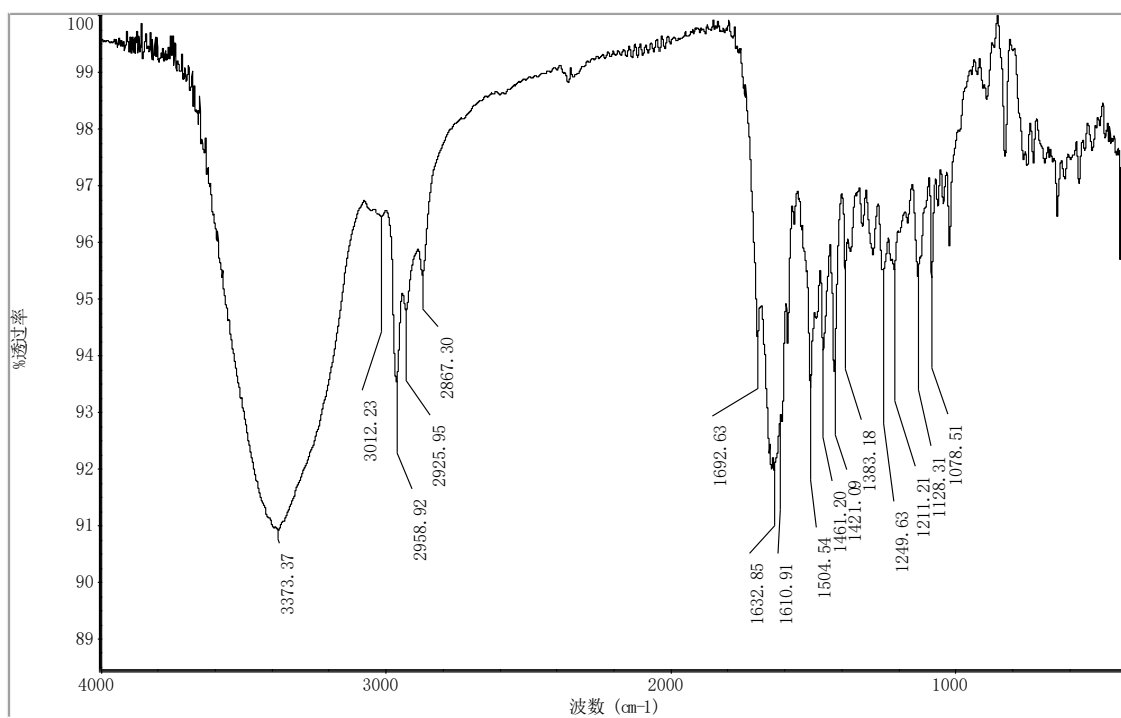

**Figure S1.** IR spectrum of **5a**



ZSY-18 #62 RT: 0.54 AV: 1 NL: 1.39E7  
T: + c ESI Q1MS [100.000-800.000]

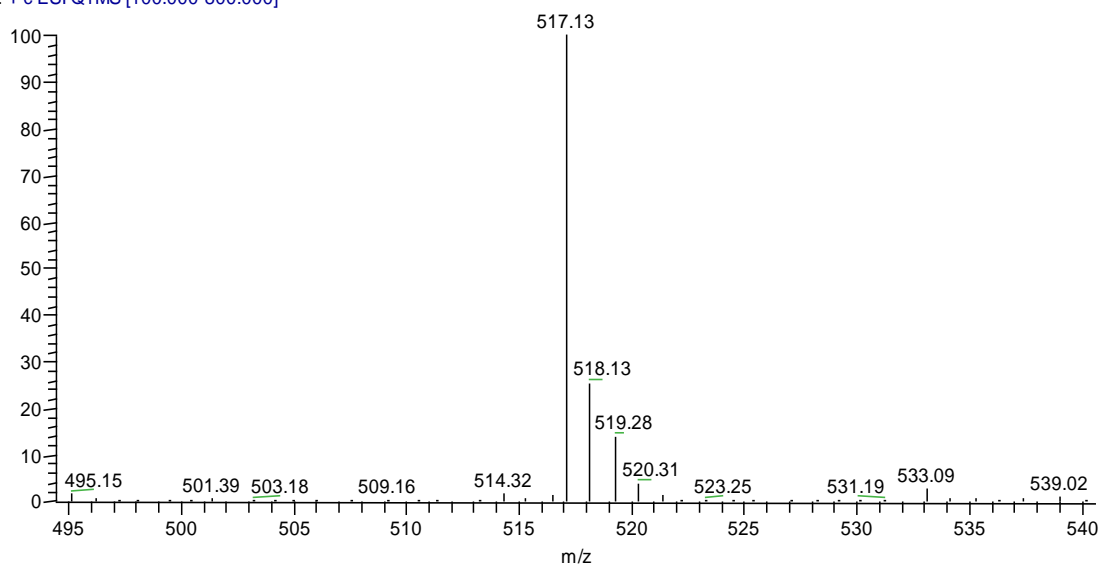

Figure S2. MS spectrum of 5a

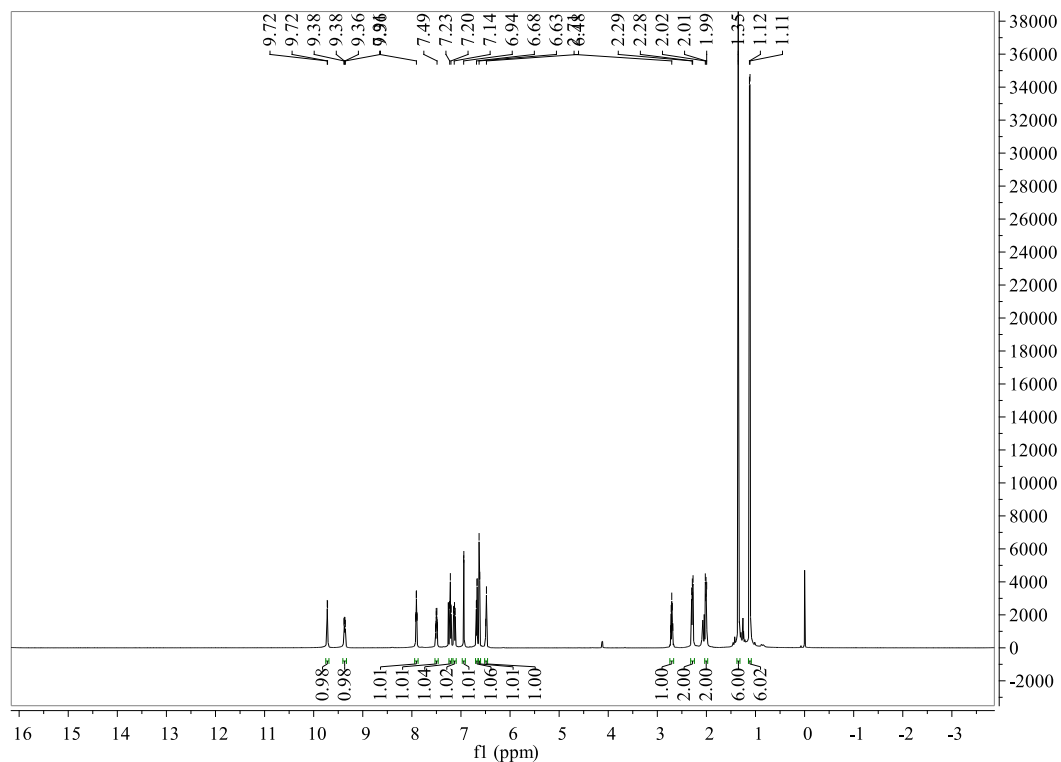

Figure S3. <sup>1</sup>H NMR spectrum of 5a

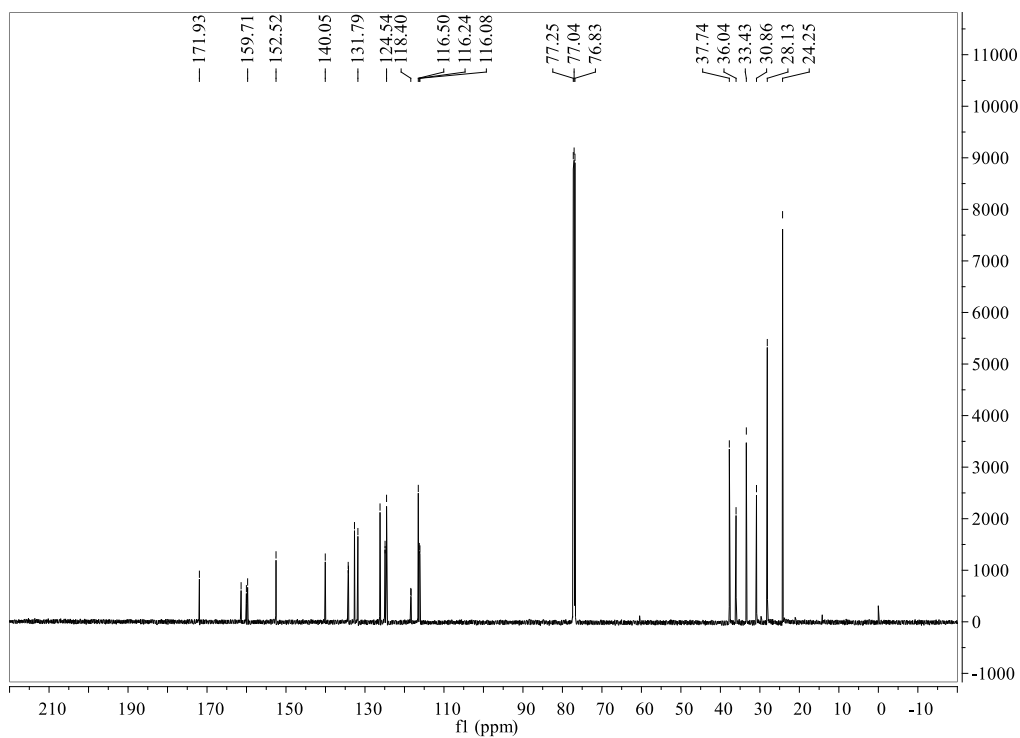

Figure S4.  $^{13}\text{C}$  NMR spectrum of **5a**

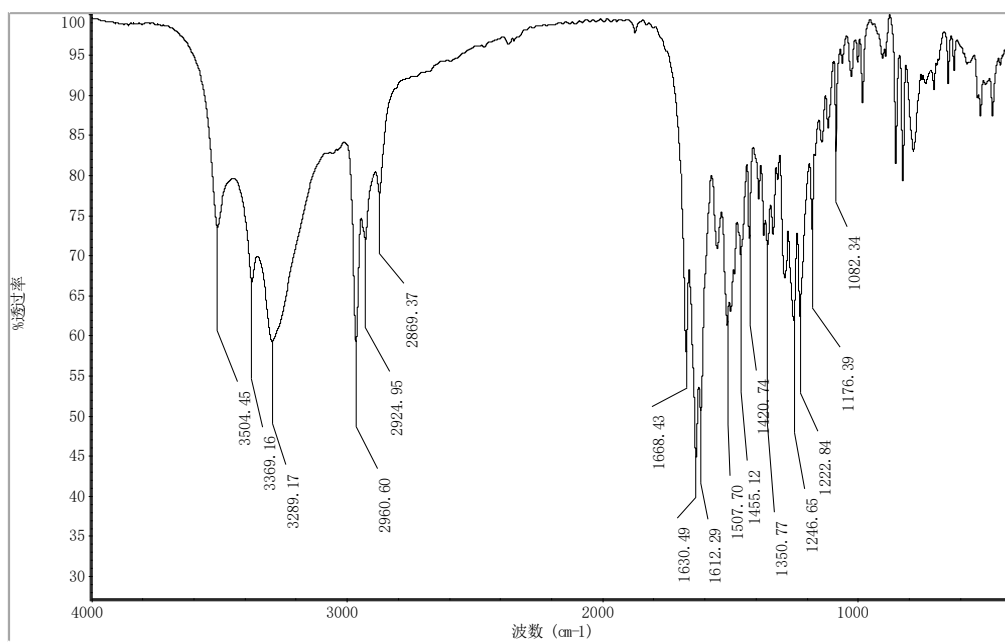

Figure S5. IR spectrum of **5b**

ZSY-20 #65 RT: 0.57 AV: 1 NL: 9.52E6  
T: + c ESI Q1MS [100.000-800.000]

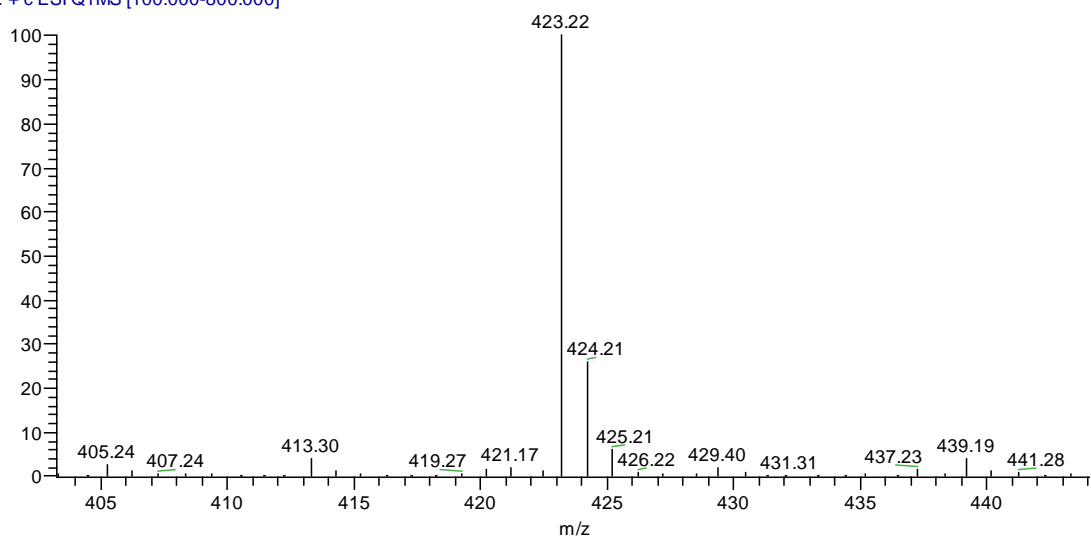

Figure S6. MS spectrum of 5b

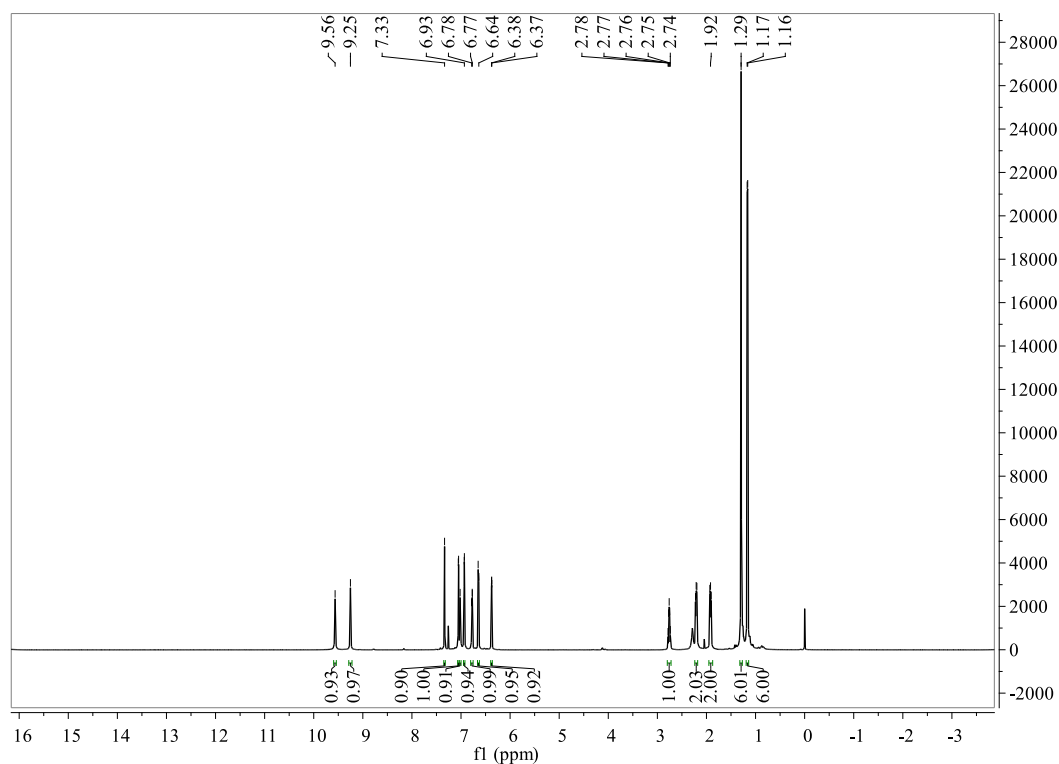

Figure S7. <sup>1</sup>H NMR spectrum of 5b

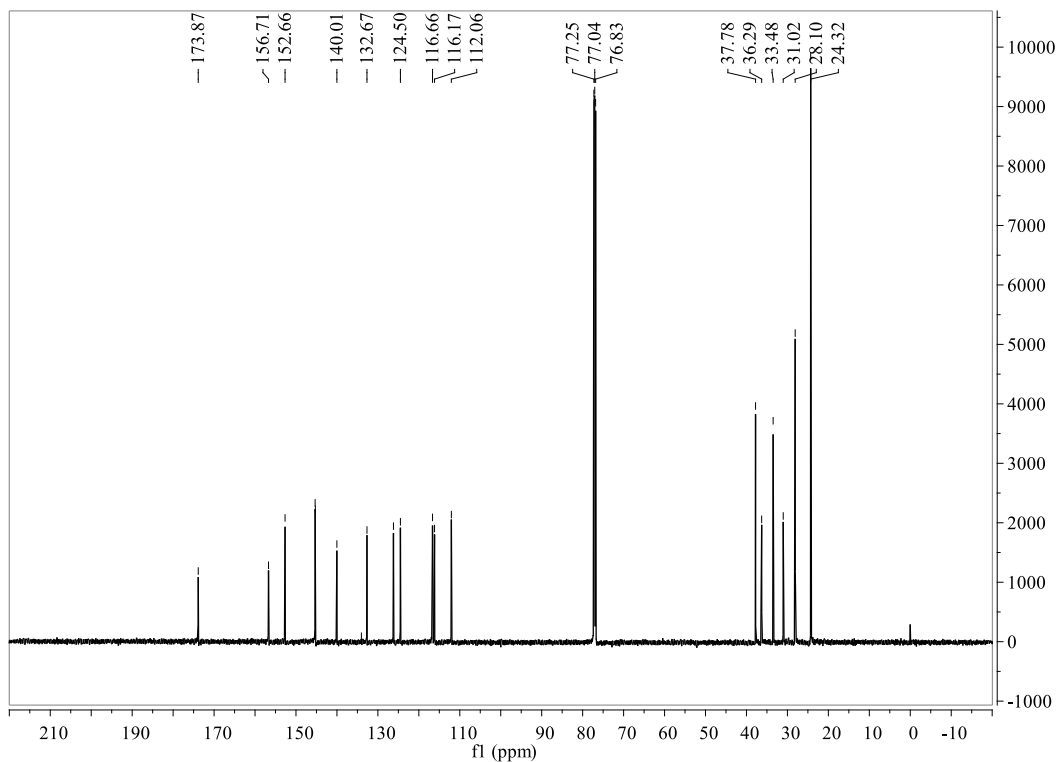

**Figure S8.  $^{13}\text{C}$  NMR spectrum of 5b**

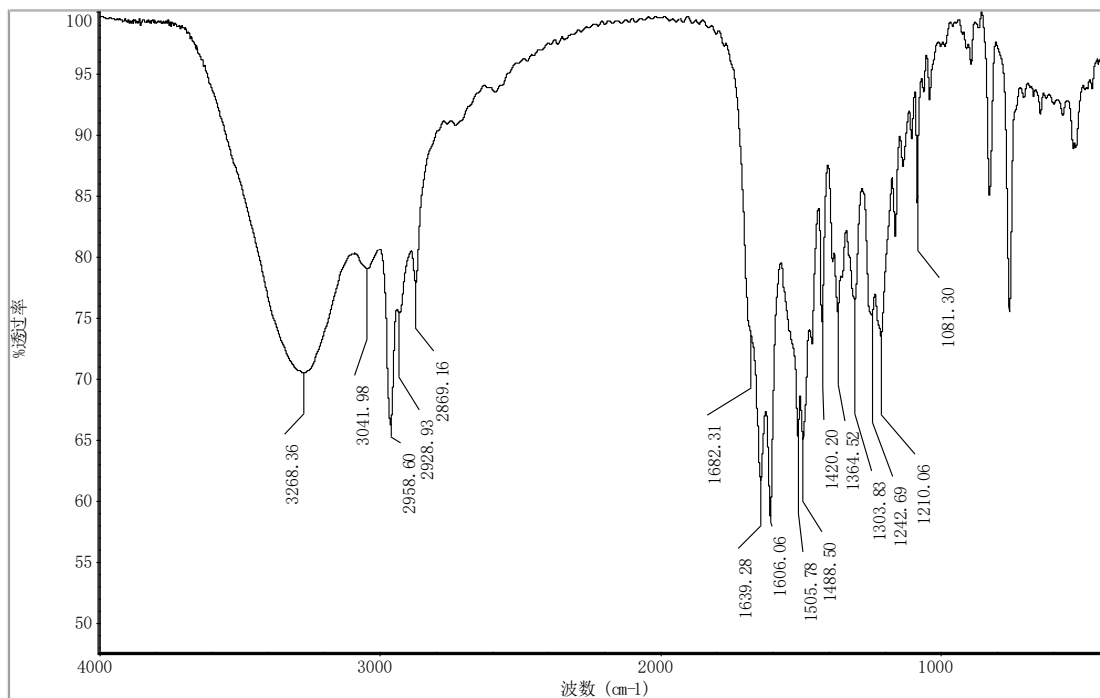

**Figure S9. IR spectrum of 5c**

ZSY-19 #61 RT: 0.53 AV: 1 NL: 2.38E7  
T: + c ESI Q1MS [100.000-800.000]

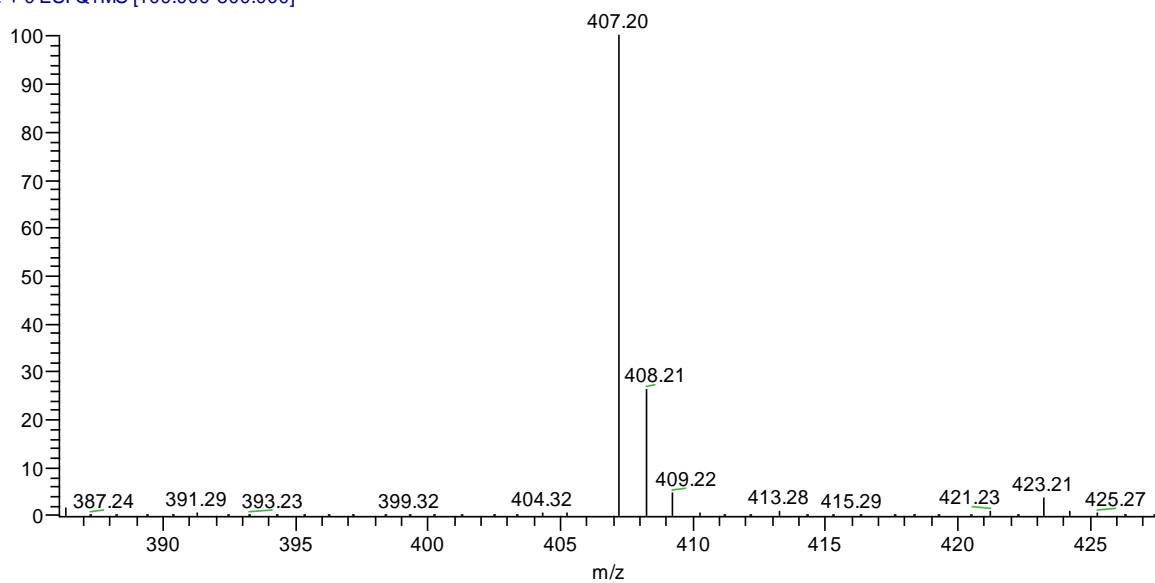

Figure S10. MS spectrum of 5c

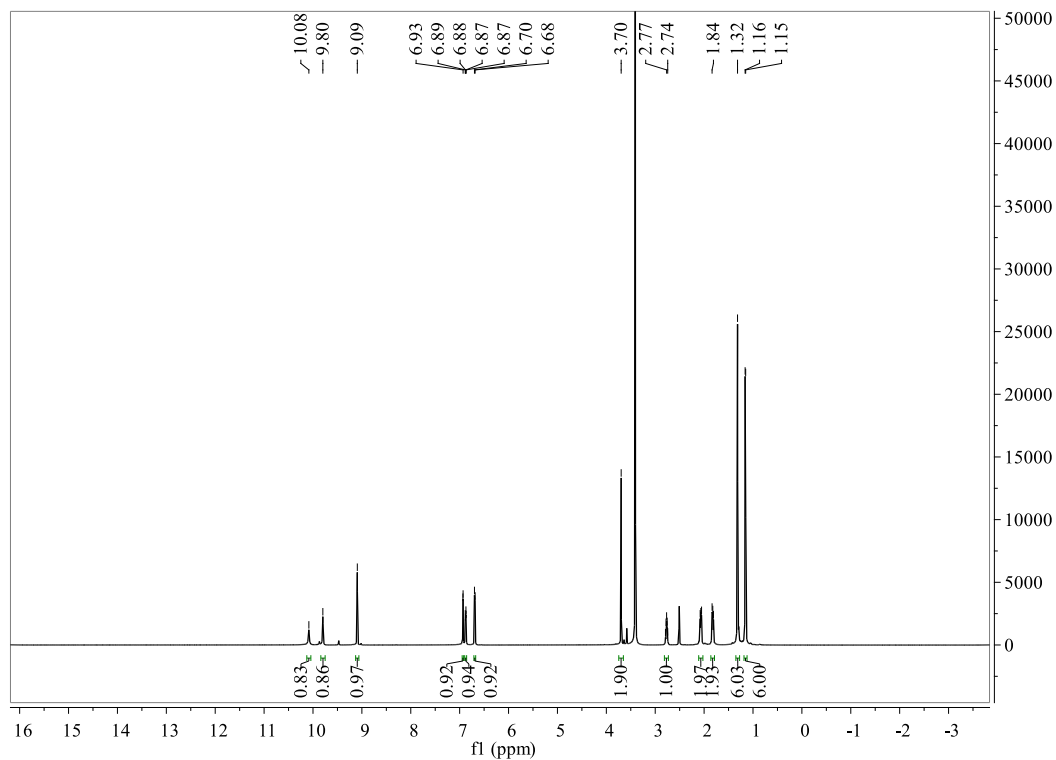

Figure S11. <sup>1</sup>H NMR spectrum of 5c

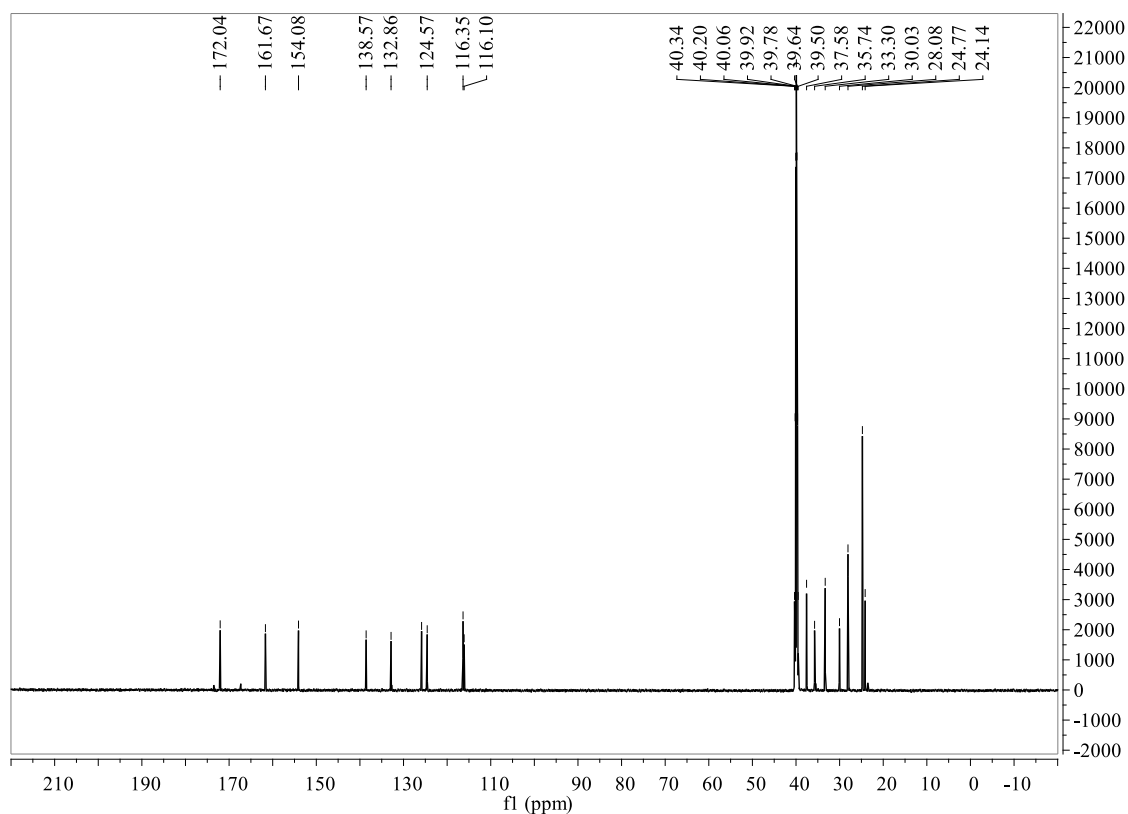

Figure S12.  $^{13}\text{C}$  NMR spectrum of 5c

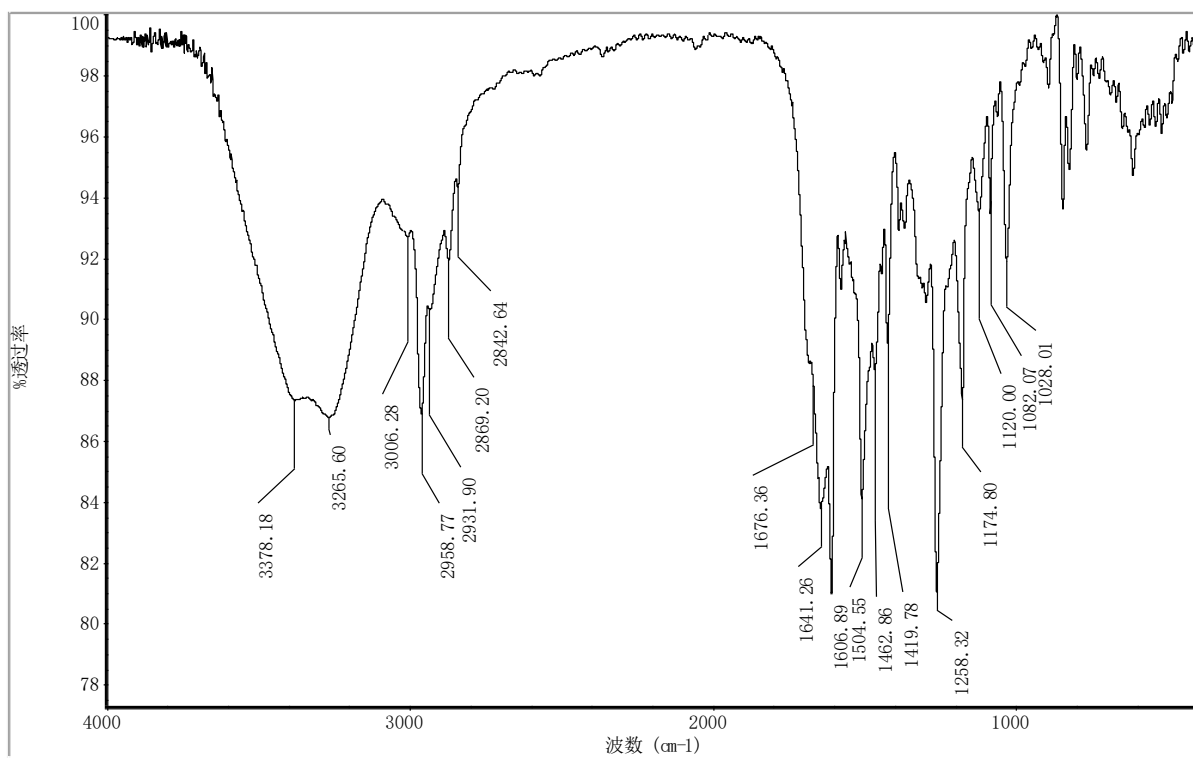

Figure S13. IR spectrum of 5d

ZSY-17 #65 RT: 0.57 AV: 1 NL: 2.19E7  
T: + c ESI Q1MS [100.000-800.000]

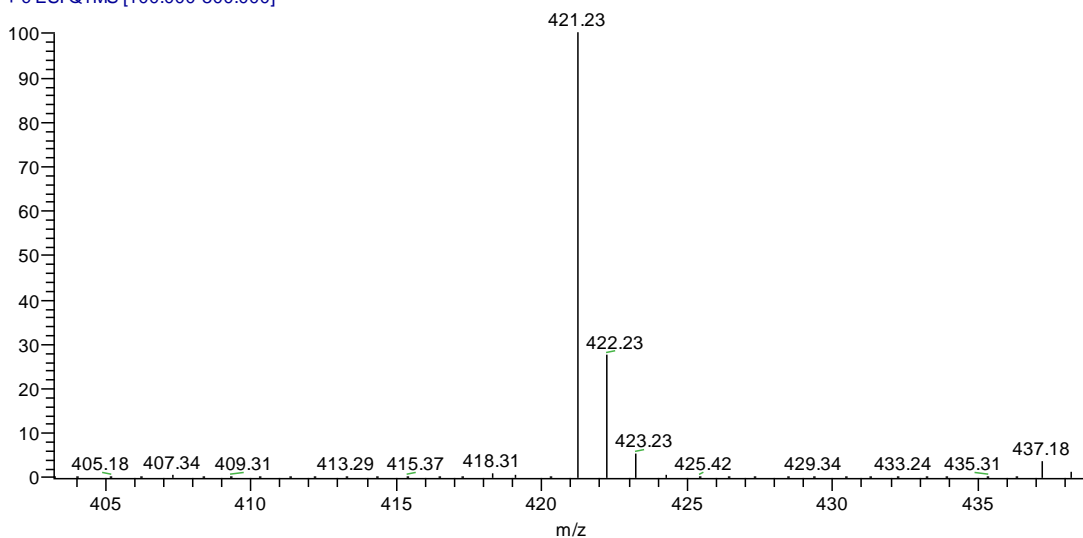

Figure S14. MS spectrum of 5d

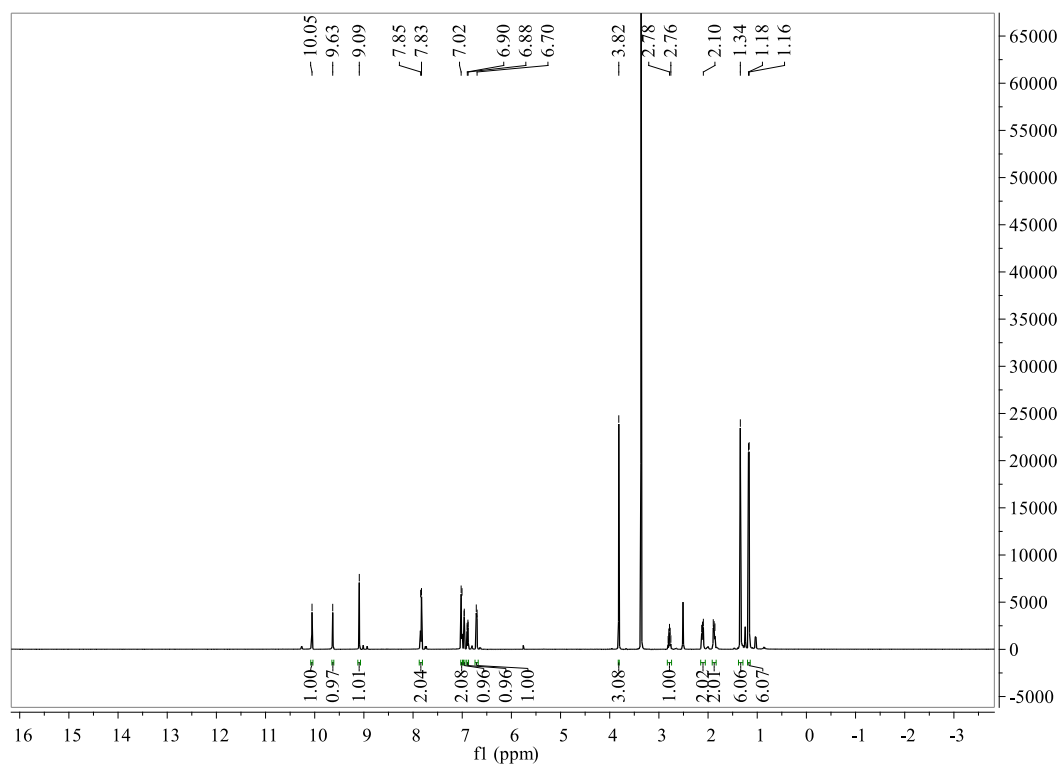

Figure S15. <sup>1</sup>H NMR spectrum of 5d

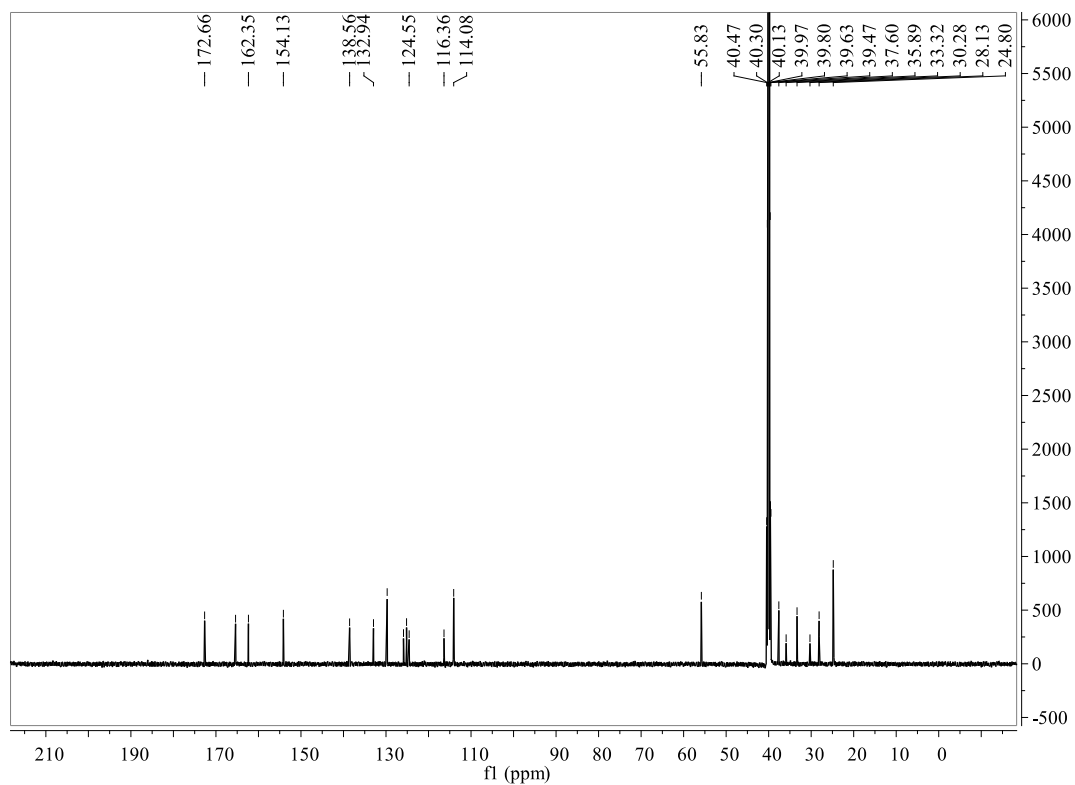

Figure S16.  $^{13}\text{C}$  NMR spectrum of 5d

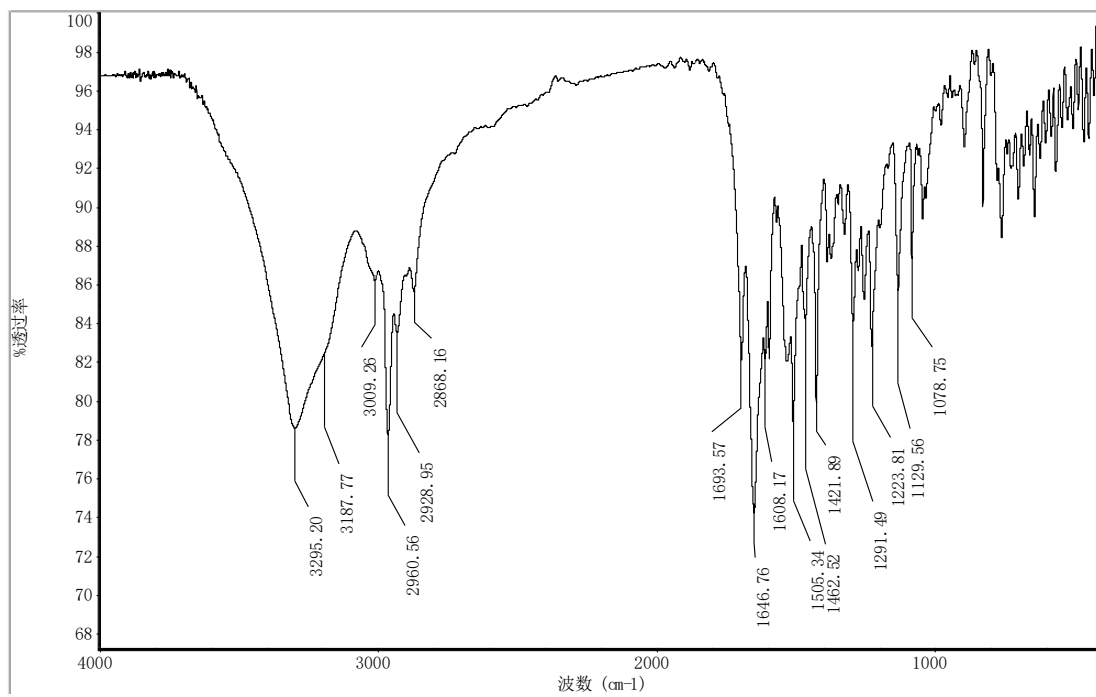

Figure S17. IR spectrum of 5e



ZSY-11 #57 RT: 0.50 AV: 1 NL: 4.80E6  
T: + c ESI Q1MS [100.000-800.000]

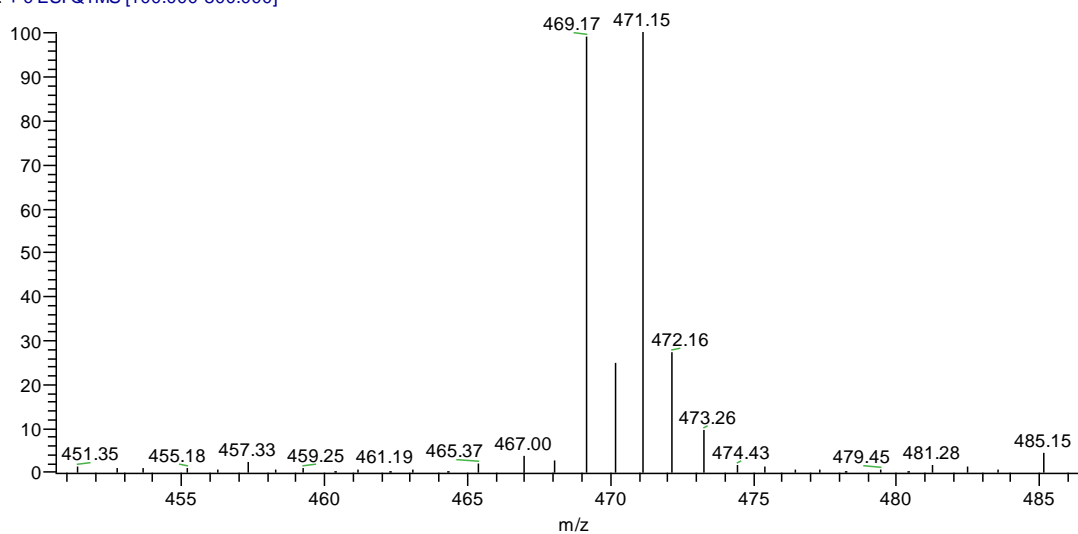

Figure S18. MS spectrum of 5e

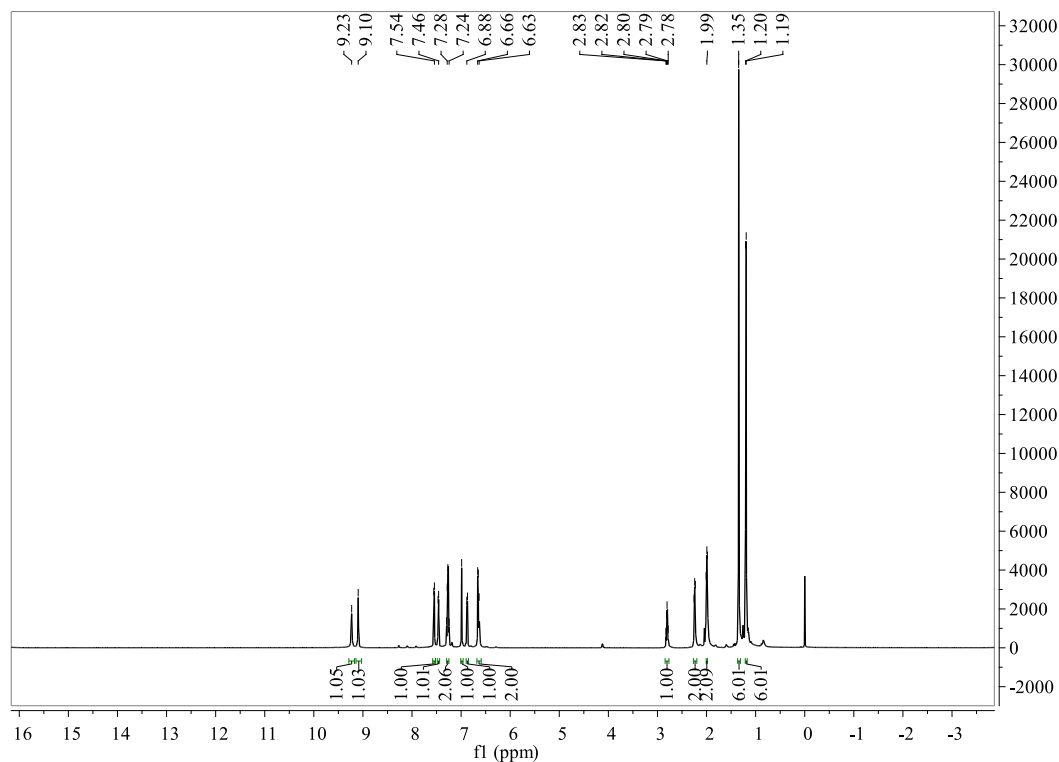

Figure S19. <sup>1</sup>H NMR spectrum of 5e

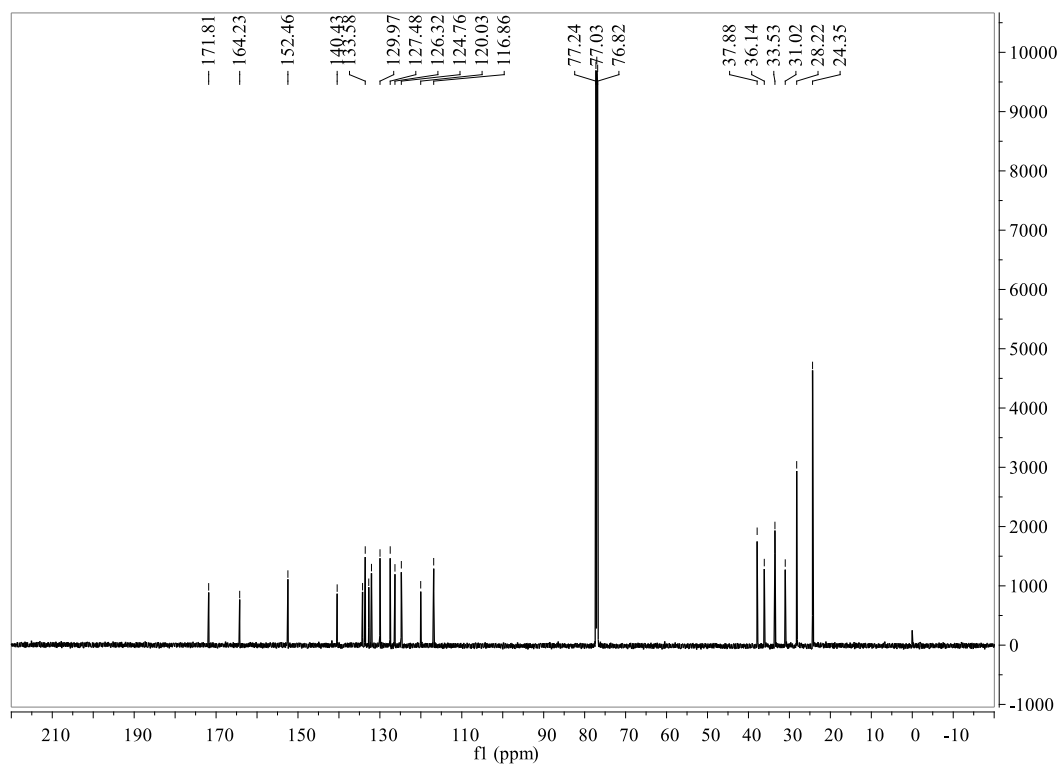

**Figure S20.** <sup>13</sup>C NMR spectrum of **5e**

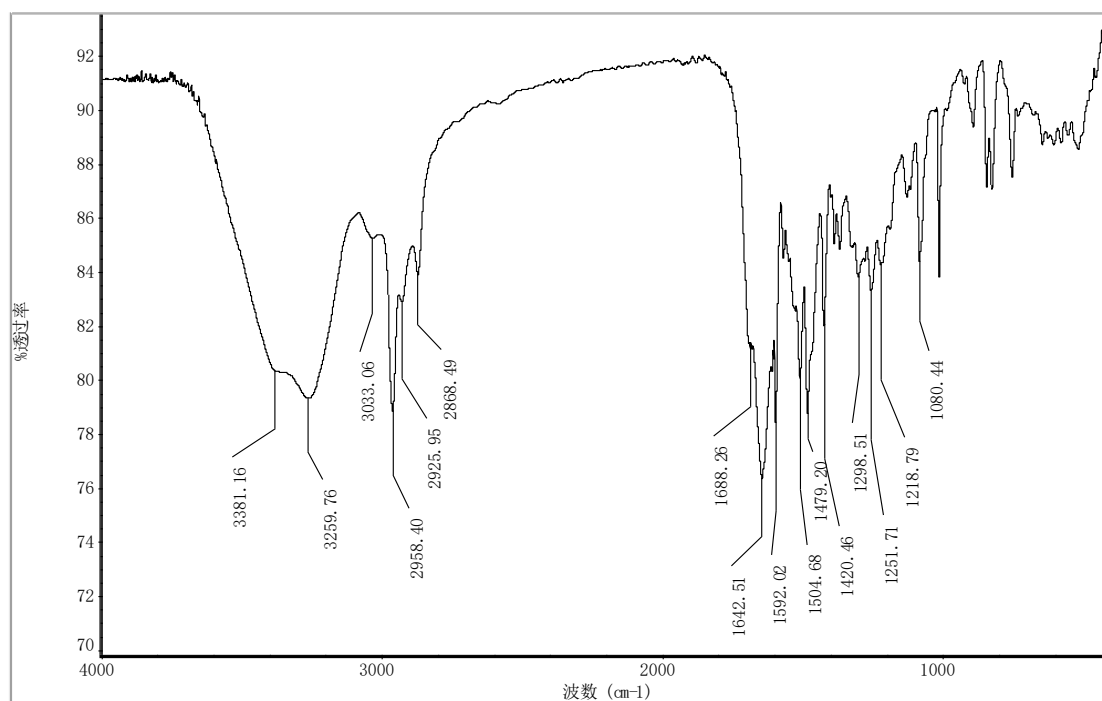

**Figure S21.** IR spectrum of **5f**

ZSY-12 #50 RT: 0.43 AV: 1 NL: 1.18E7  
T: + c ESI Q1MS [100.000-800.000]

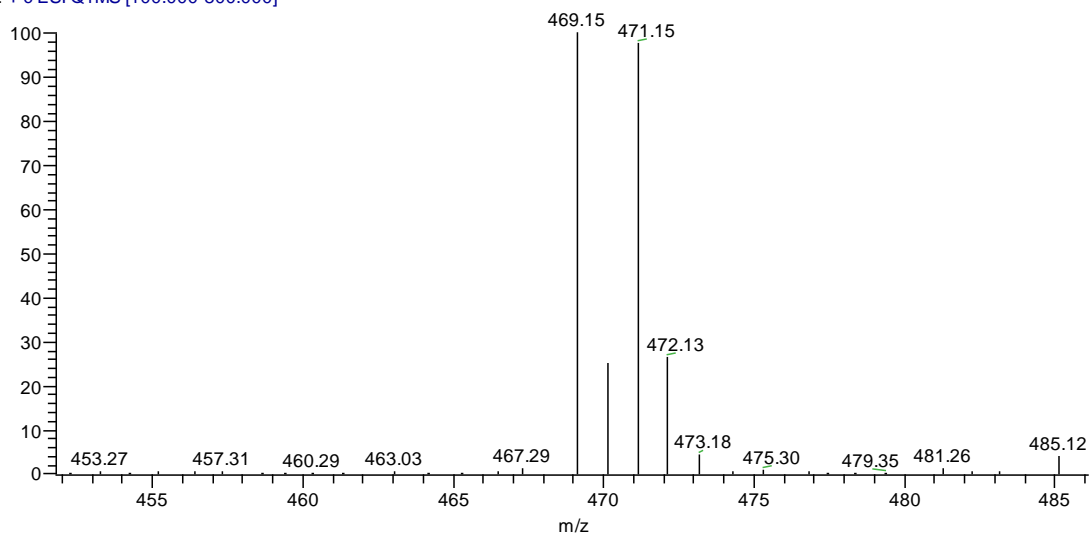

Figure S22. MS spectrum of 5f

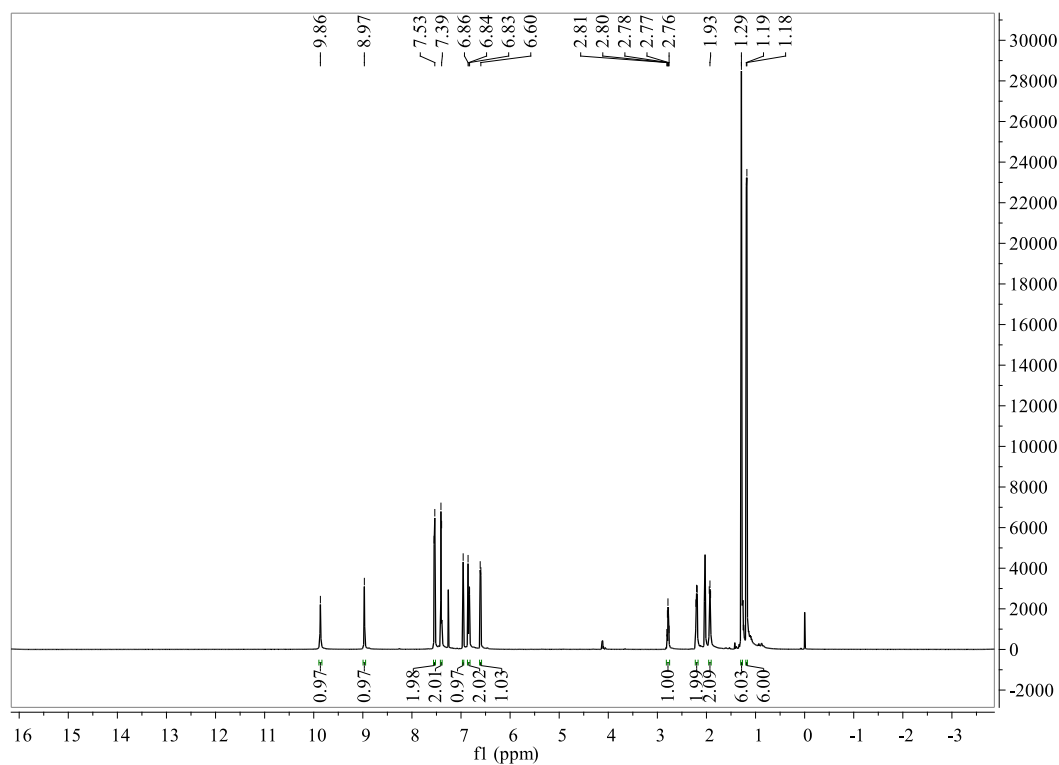

Figure S23. <sup>1</sup>H NMR spectrum of 5f

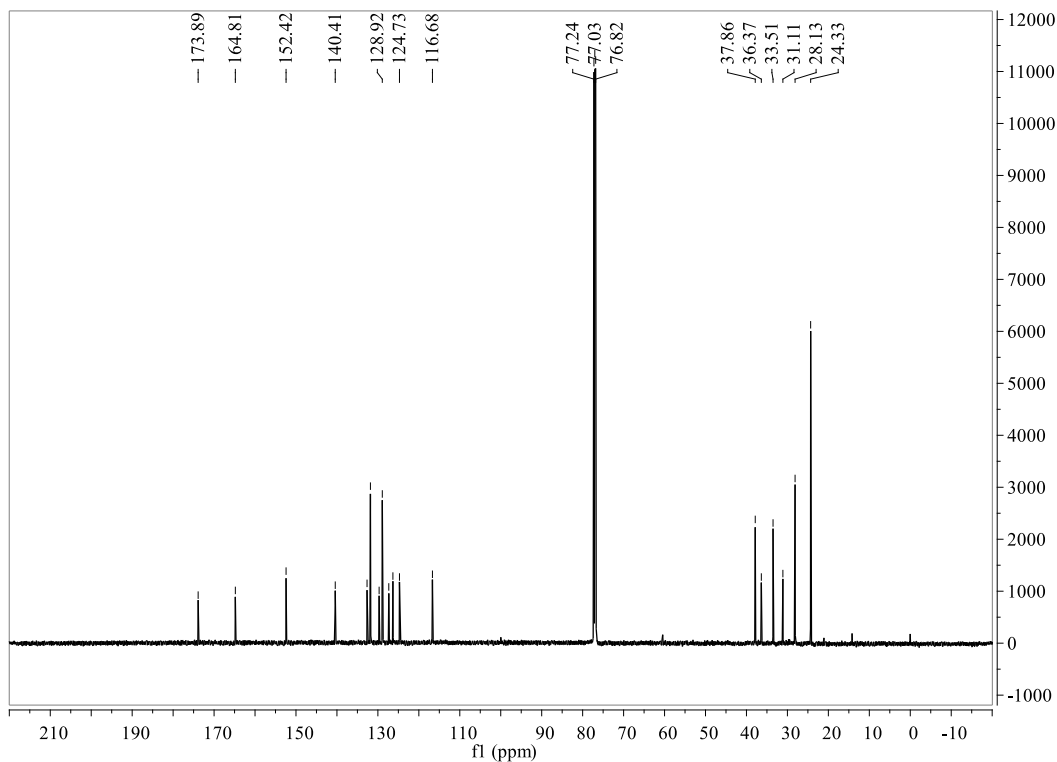

Figure S24. <sup>13</sup>C NMR spectrum of 5f

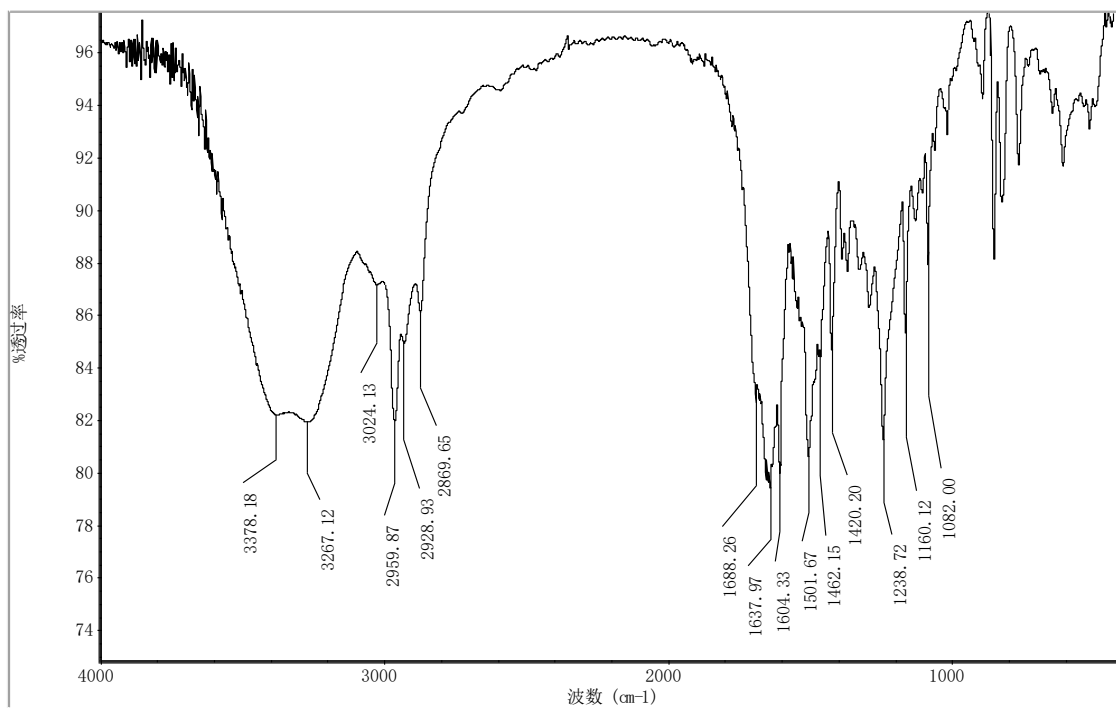

Figure S25. IR spectrum of 5g

ZSY-14 #64 RT: 0.56 AV: 1 NL: 1.83E7  
T: + c ESI Q1MS [100.000-800.000]

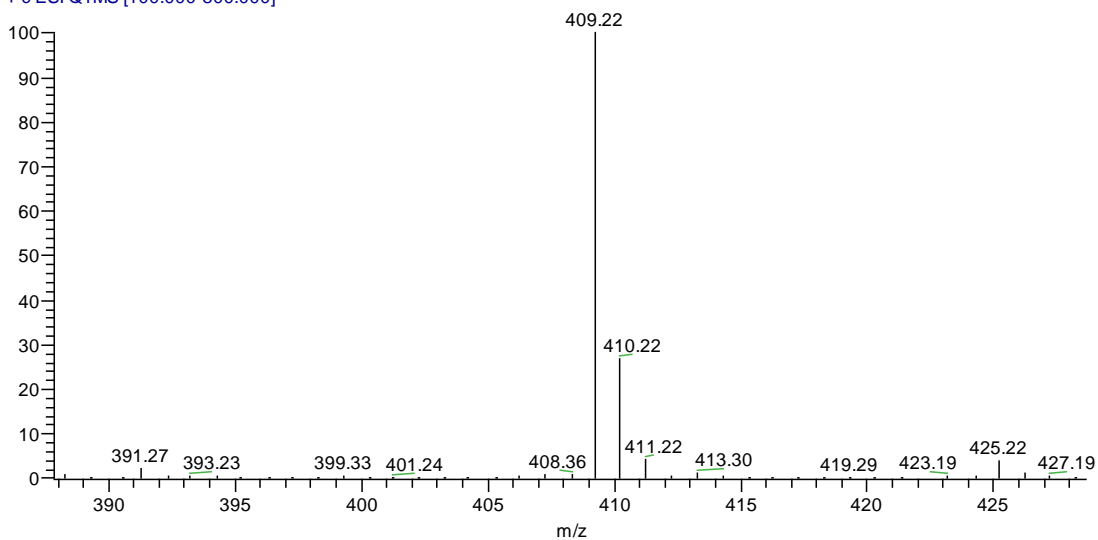

Figure S26. MS spectrum of 5g

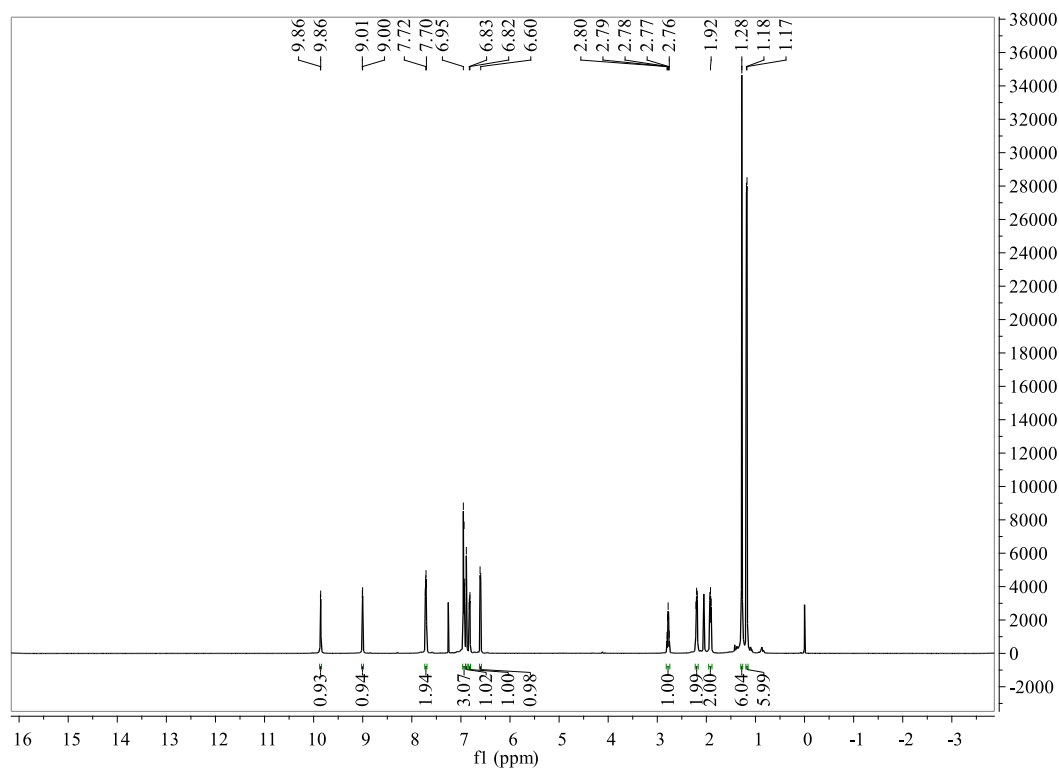

Figure S27.  $^1\text{H}$  NMR spectrum of 5g

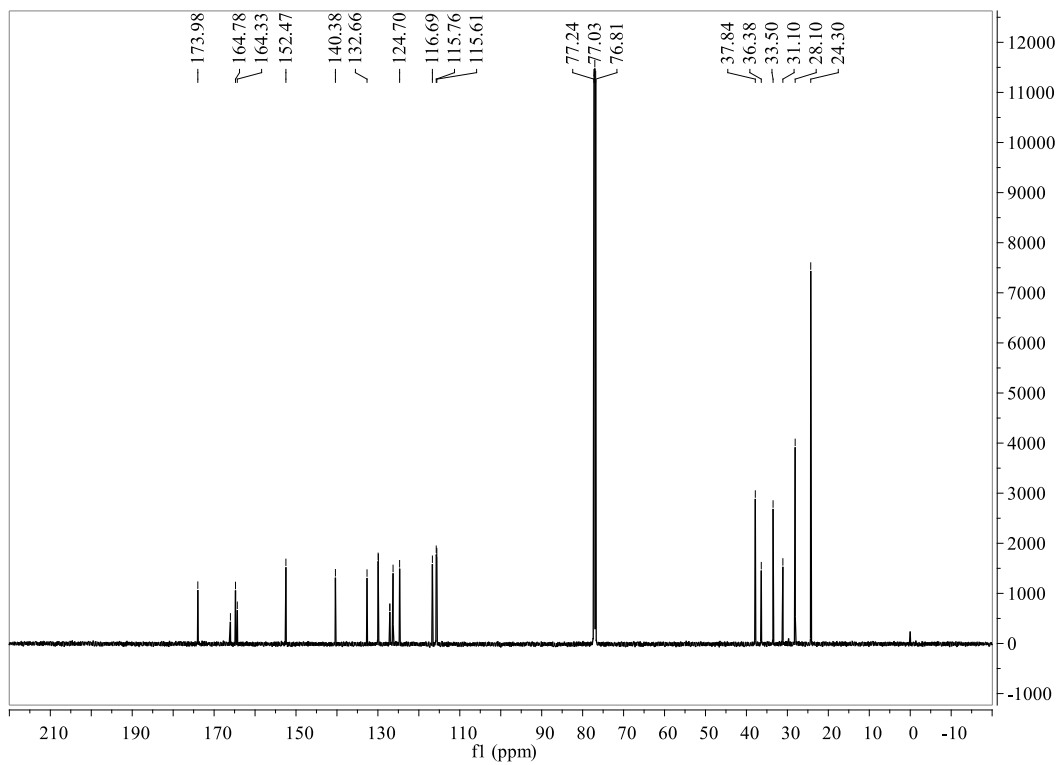

Figure S28.  $^{13}\text{C}$  NMR spectrum of **5g**

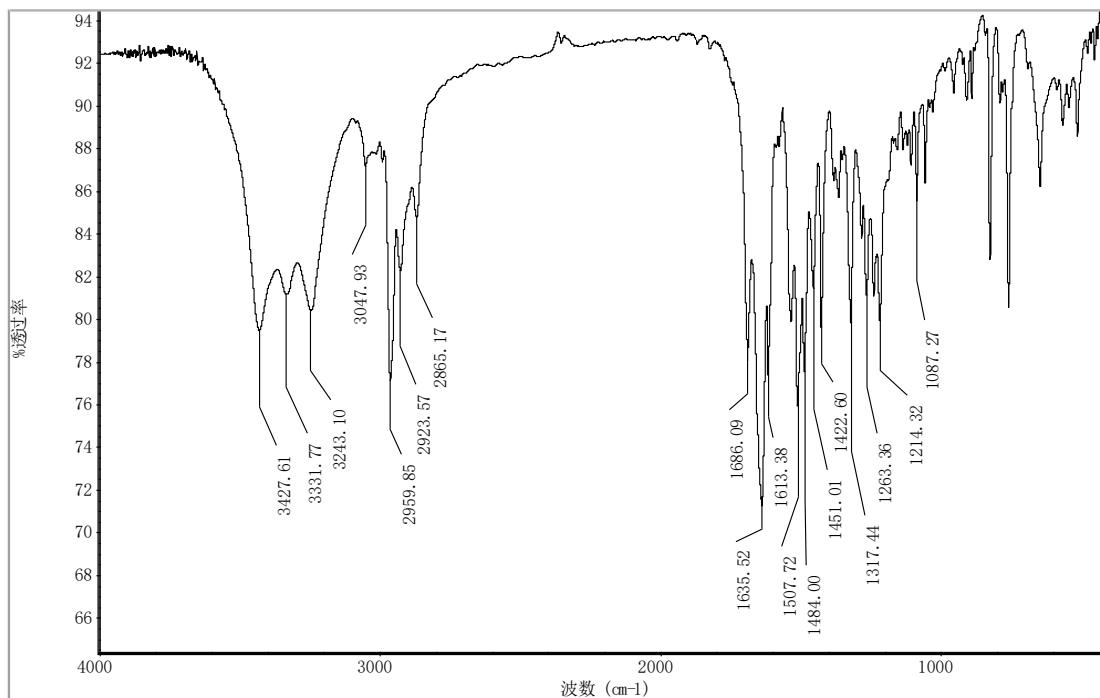

Figure S29. IR spectrum of **5h**

ZSY-13 #67 RT: 0.58 AV: 1 NL: 1.92E7  
T: + c ESI Q1MS [100.000-800.000]

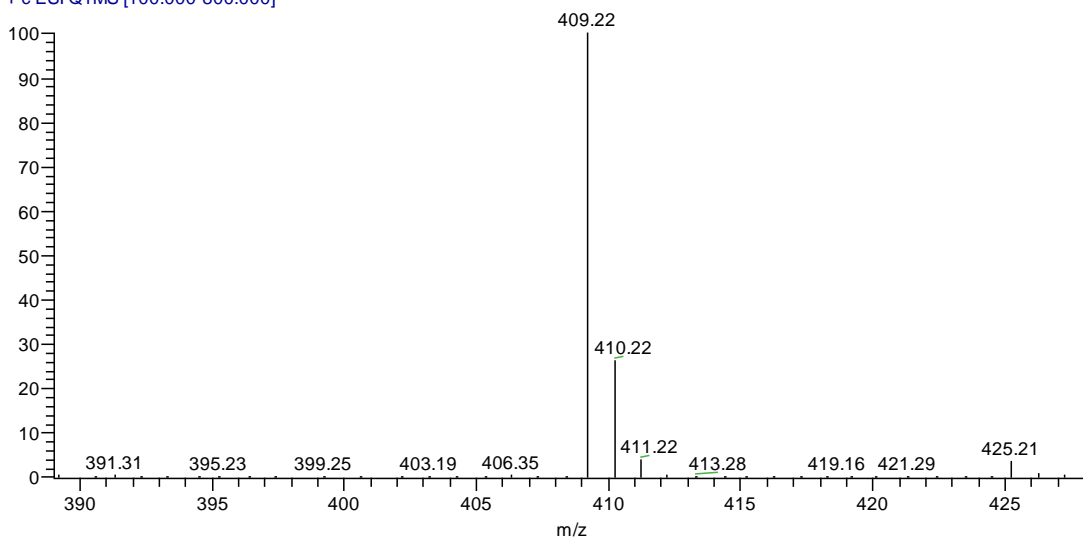

Figure S30. MS spectrum of 5h

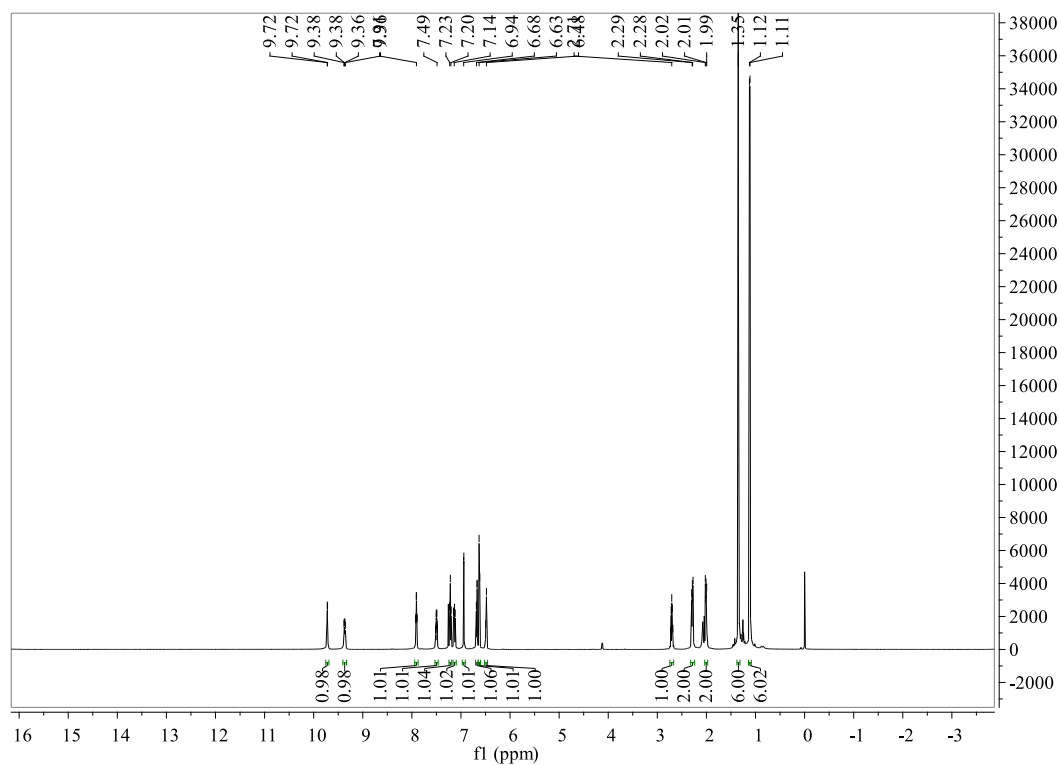

Figure S31. <sup>1</sup>H NMR spectrum of 5h

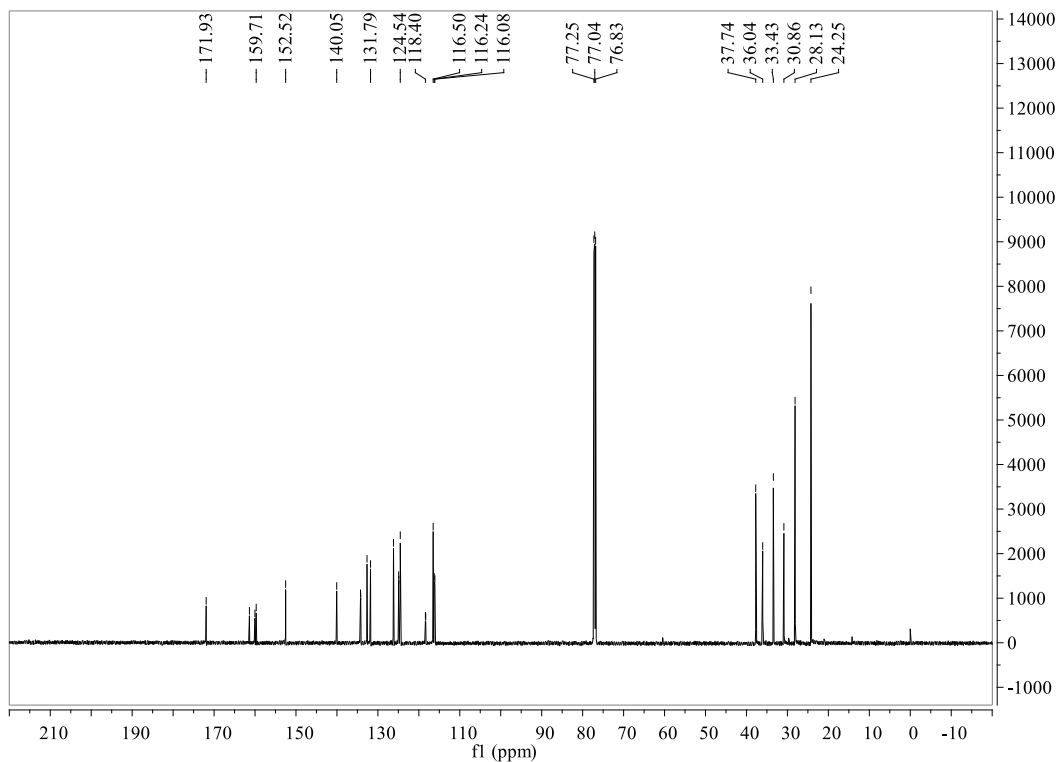

**Figure S32.**  $^{13}\text{C}$  NMR spectrum of 5h

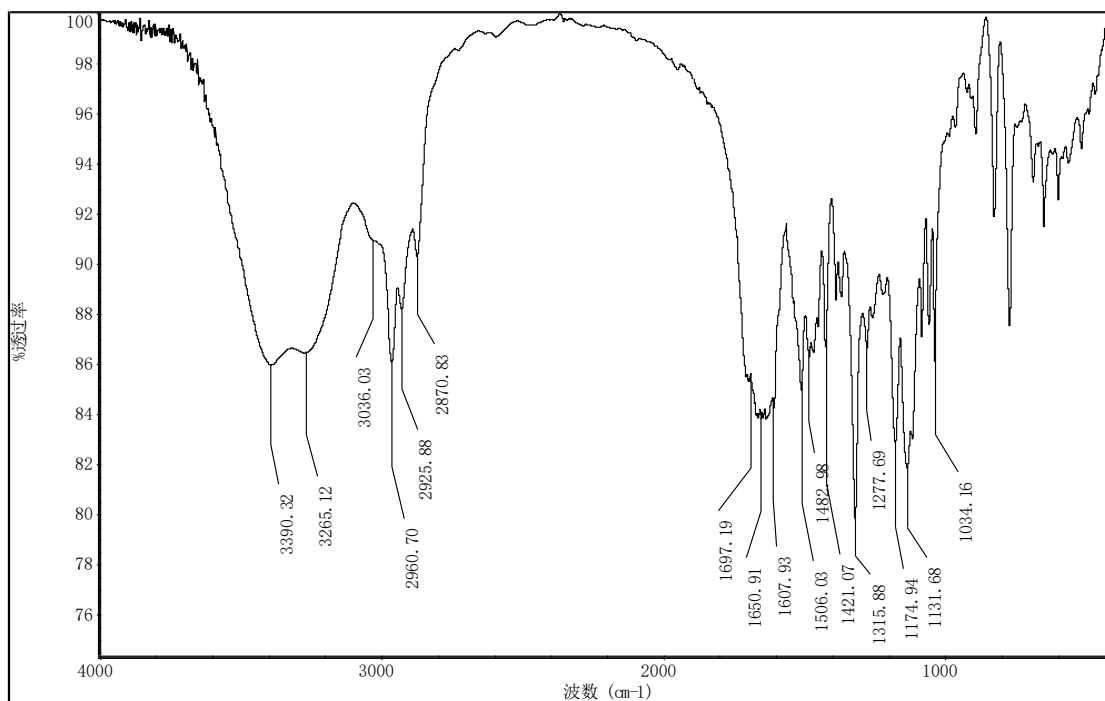

**Figure S33.** IR spectrum of 5i



ZSY-10 #63 RT: 0.55 AV: 1 NL: 4.45E7  
T: + c ESI Q1MS [100.000-800.000]

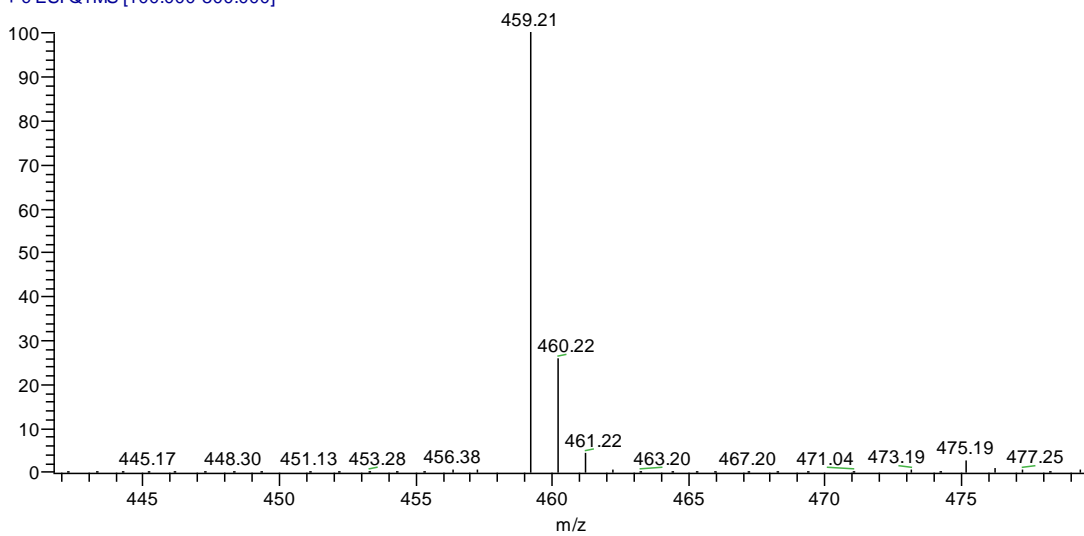

Figure S34. MS spectrum of 5i

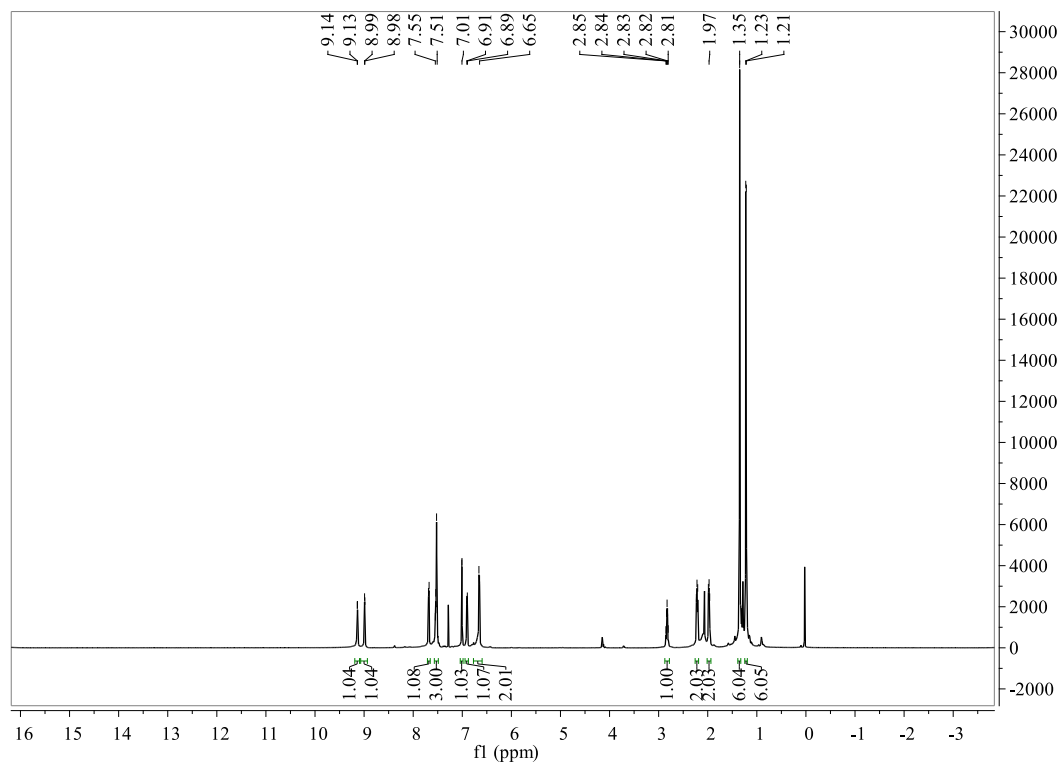

Figure S35.  $^1\text{H}$  NMR spectrum of 5i

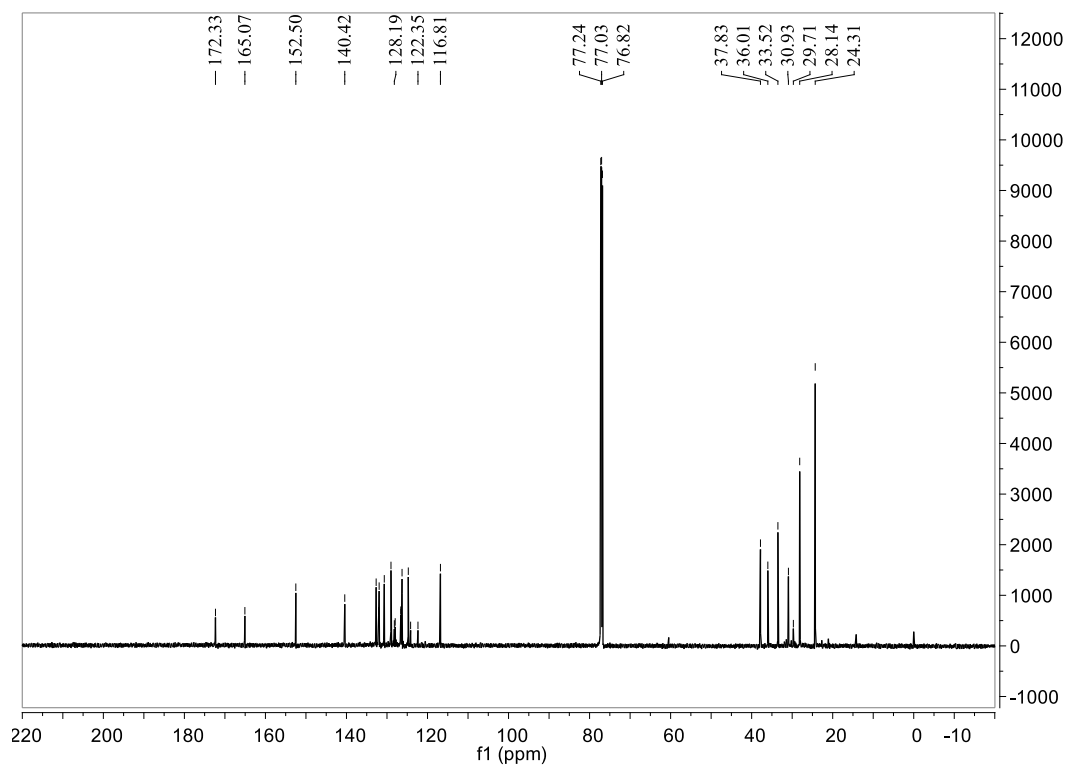

Figure S36. <sup>13</sup>C NMR spectrum of 5i

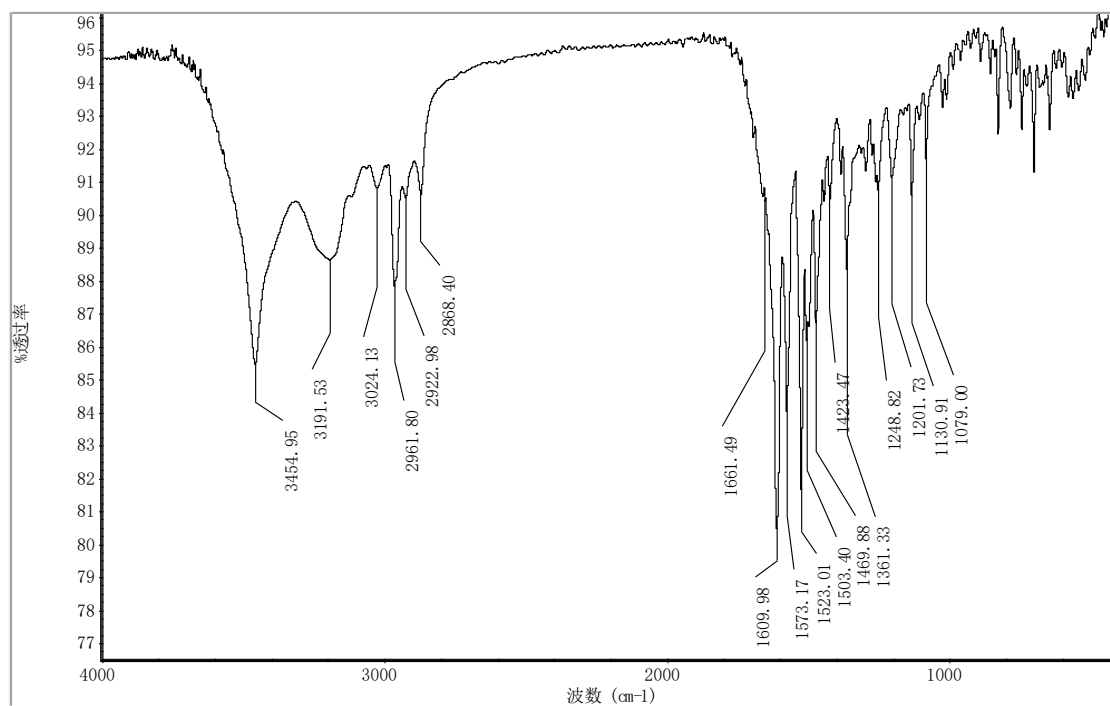

Figure S37. IR spectrum of 5j

ZSY-15 #53 RT: 0.46 AV: 1 NL: 2.28E7  
T: + c ESI Q1MS [100.000-800.000]

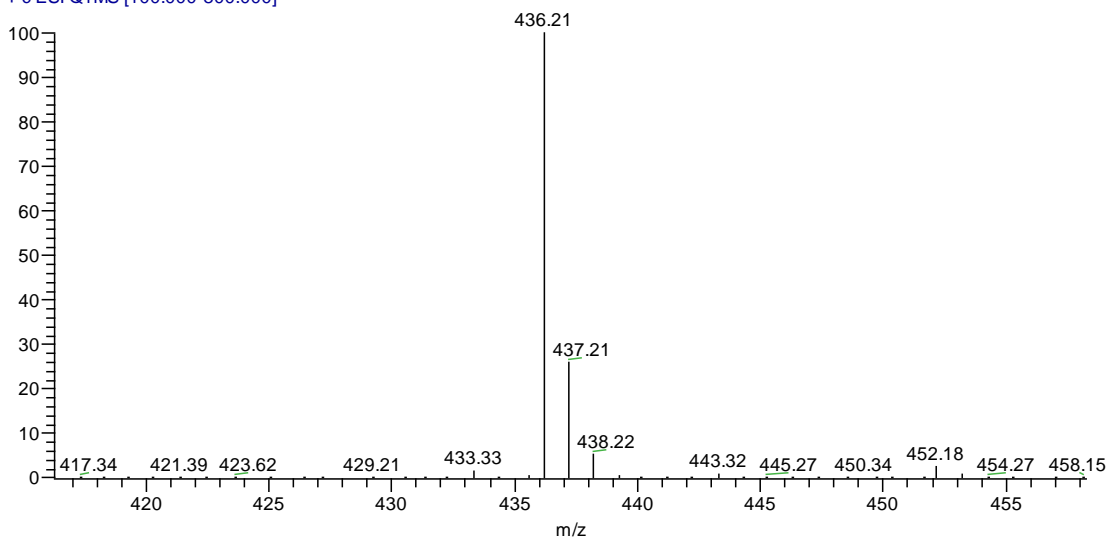

Figure S38. MS spectrum of 5j

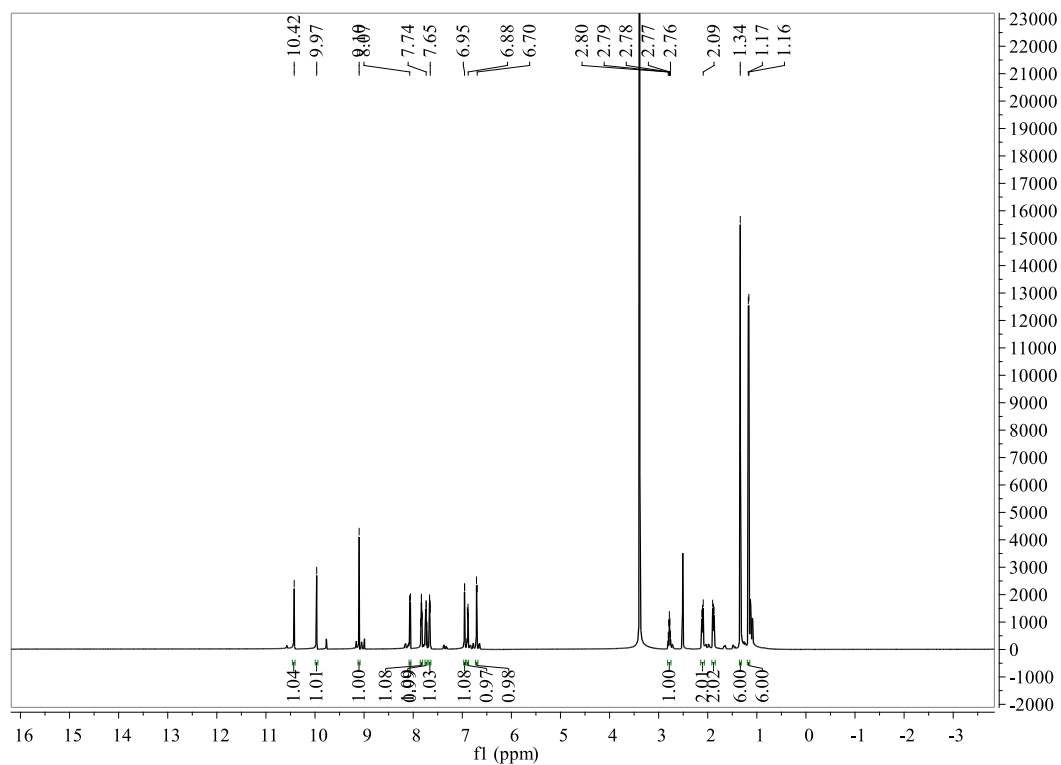

Figure S39.  $^1\text{H}$  NMR spectrum of 5j

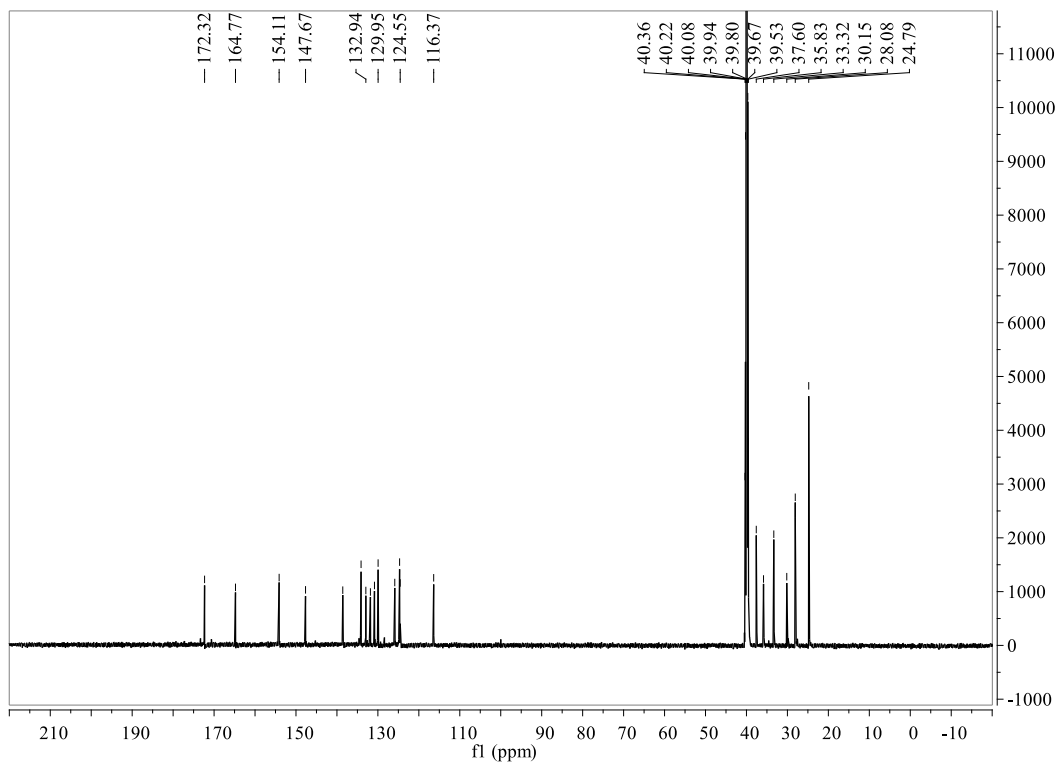

**Figure S40.**  $^{13}\text{C}$  NMR spectrum of **5j**

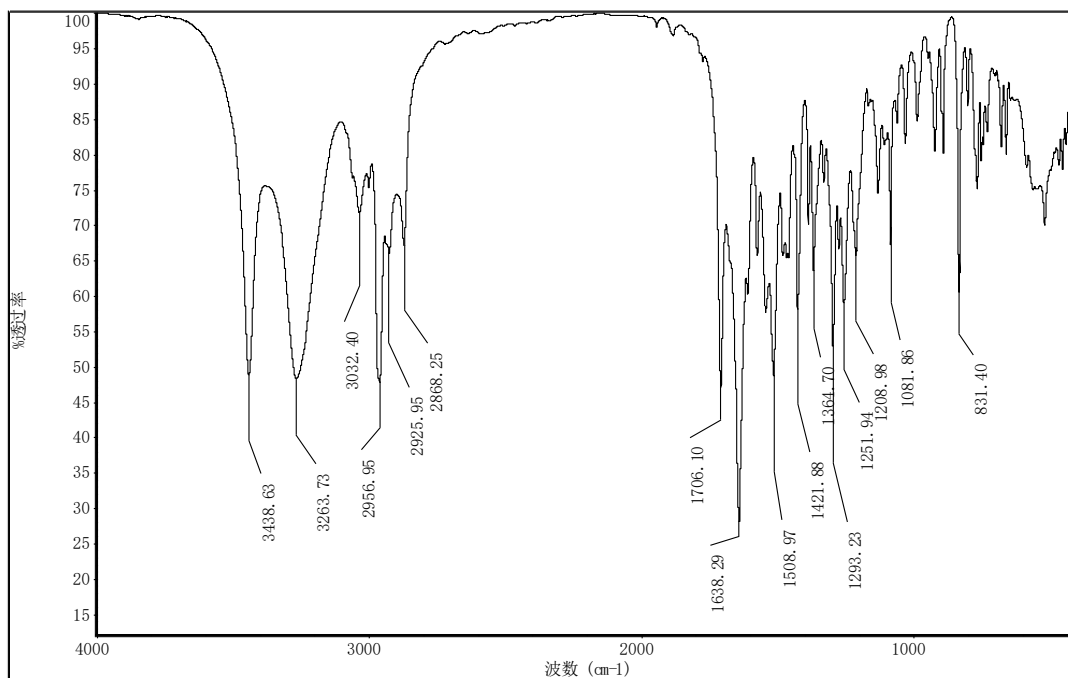

**Figure S41.** IR spectrum of **5k**

ZSY-5 #21 RT: 0.34 AV: 1 SB: 17 0.02-0.06  
T: +c ESI Q1MS [200.000-600.000]

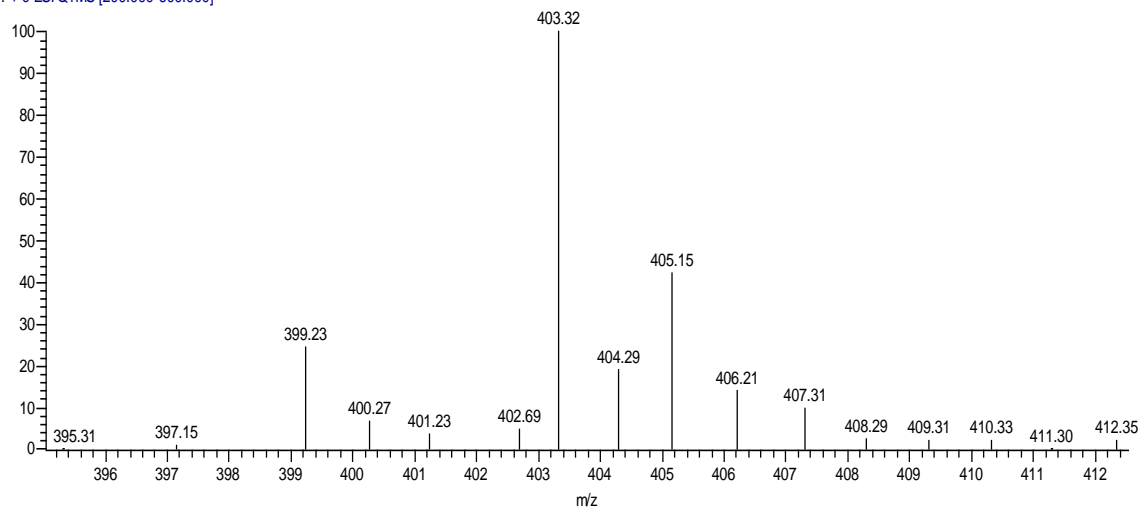

Figure S42. MS spectrum of 5k

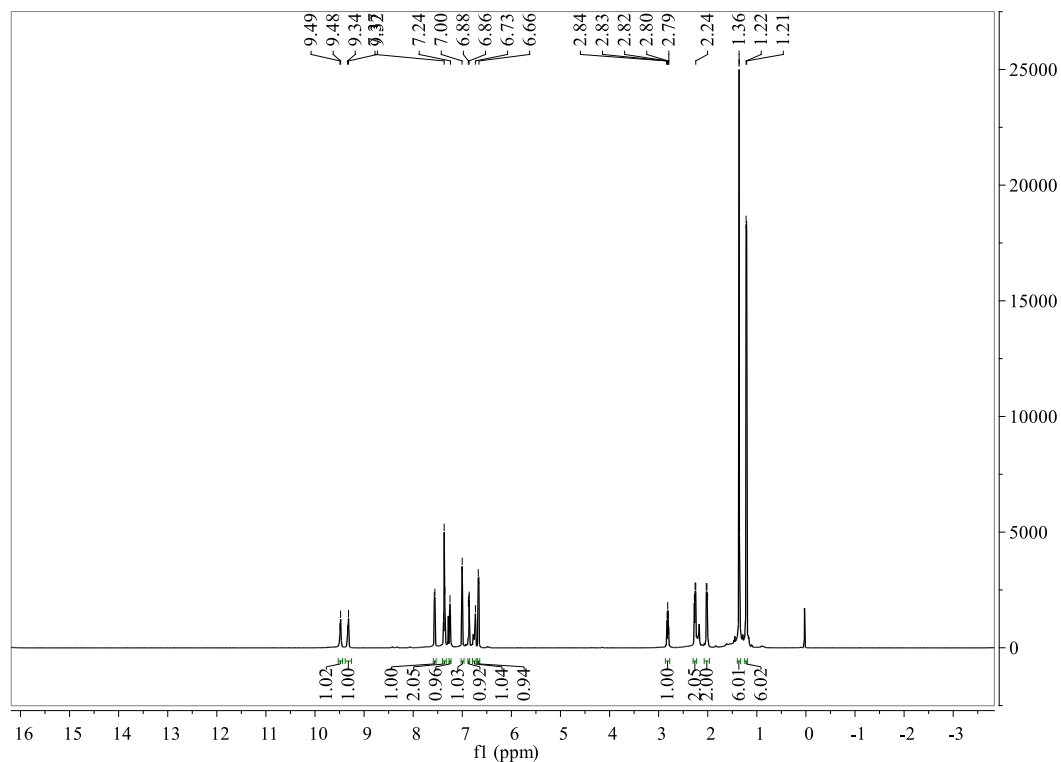

Figure S43. <sup>1</sup>H NMR spectrum of 5k

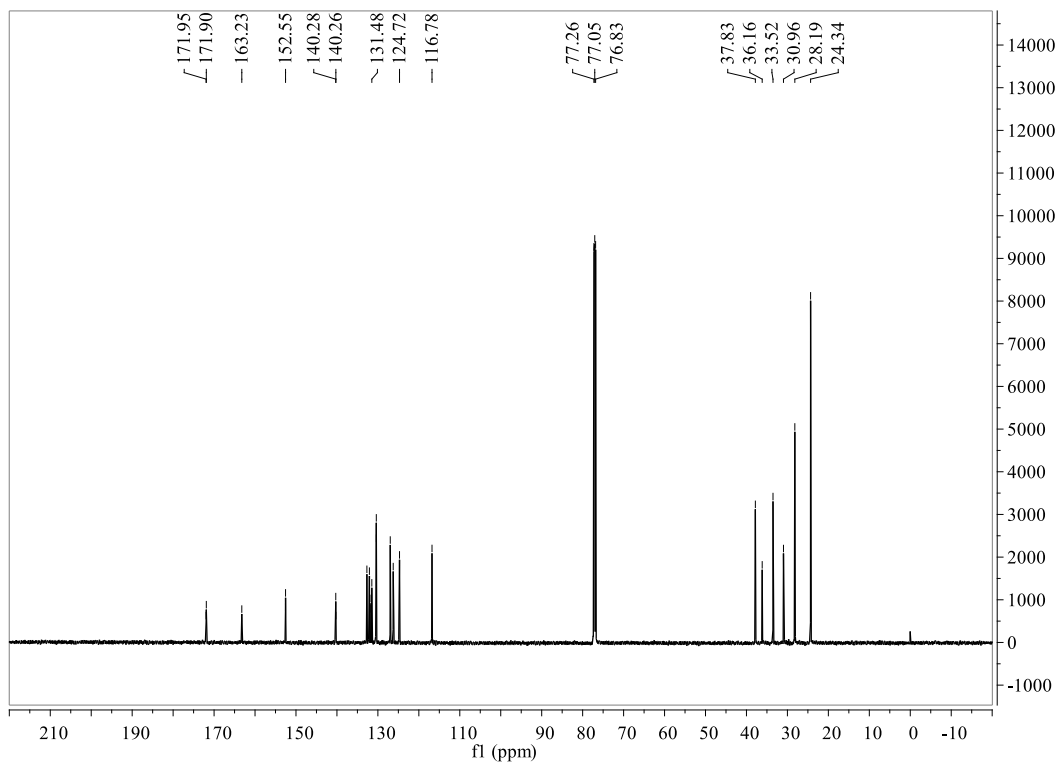

Figure S44. <sup>13</sup>C NMR spectrum of 5k

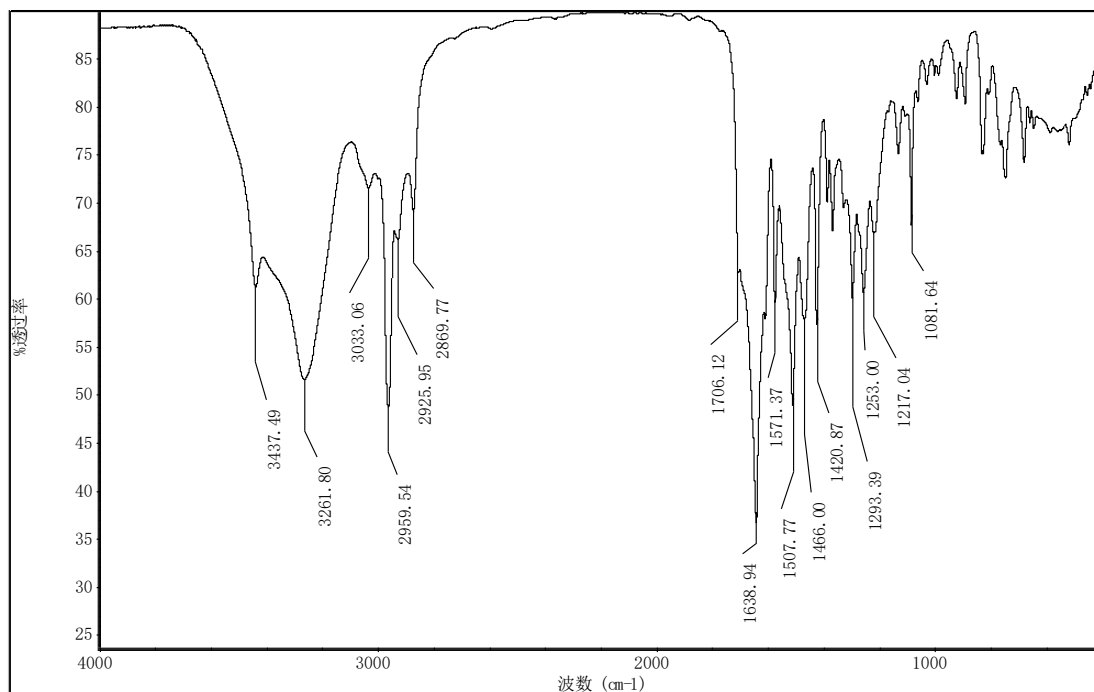

Figure S45. IR spectrum of 5l

ZSY-6 #28 RT: 0.47 AV: 1 SB: 40 0.08-0.33  
T: + c ESI Q1MS [200.000-600.000]

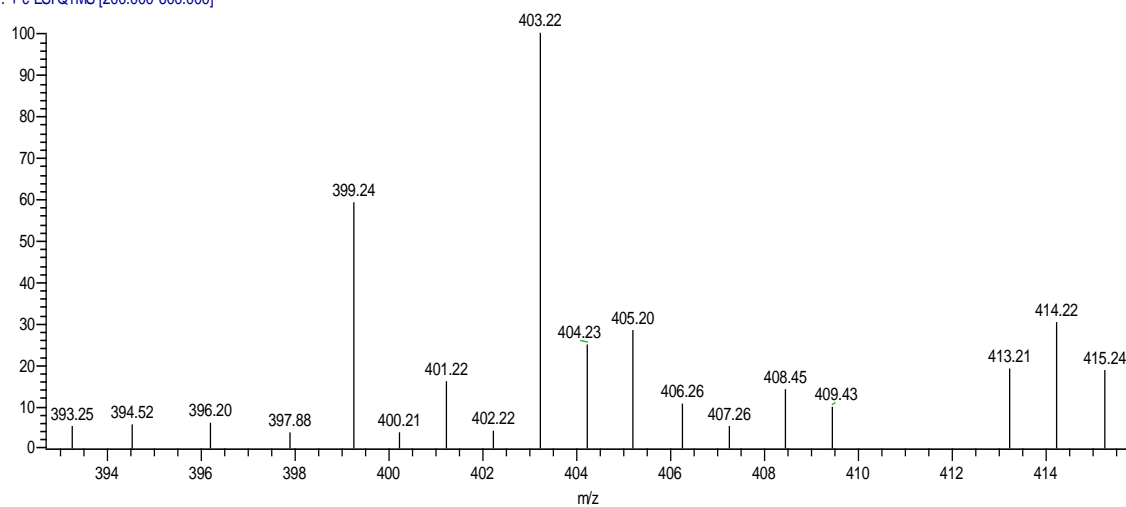

Figure S46. MS spectrum of 51

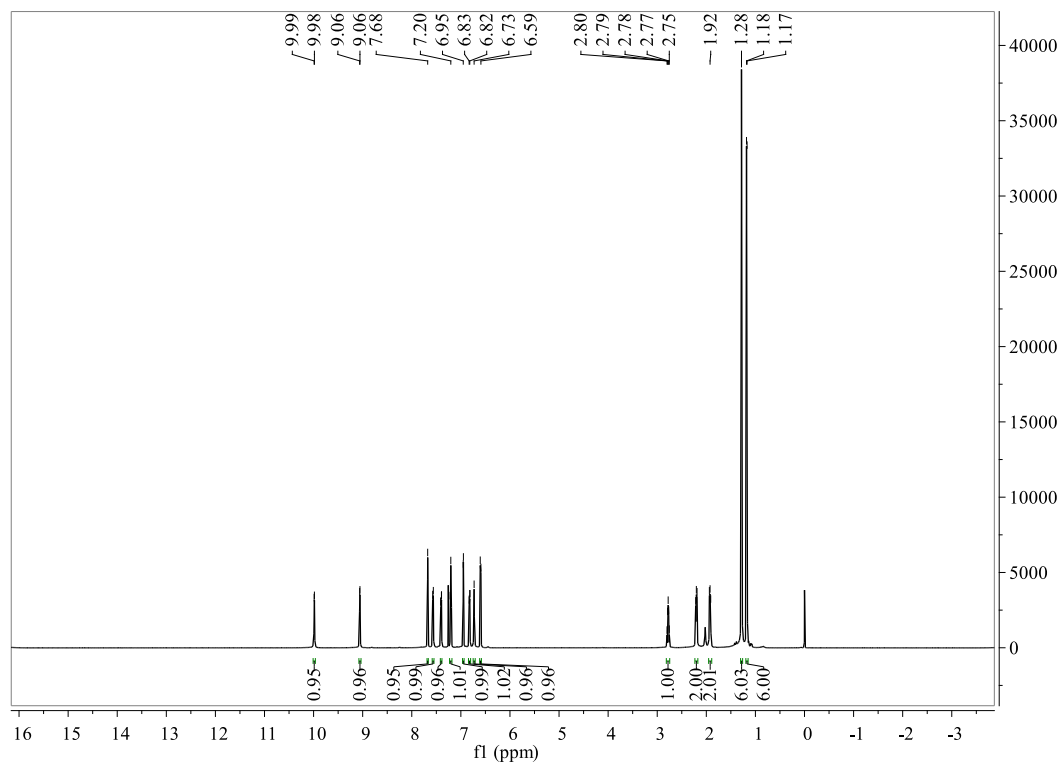

Figure S47.  $^1\text{H}$  NMR spectrum of 51

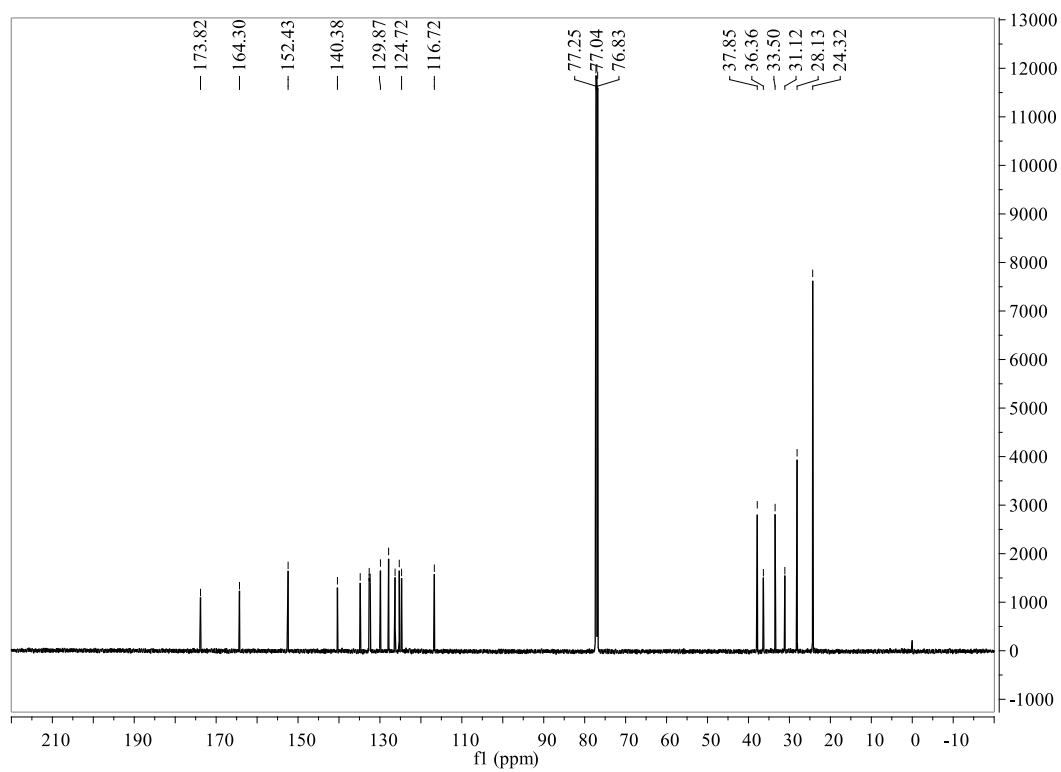

Figure S48.  $^{13}\text{C}$  NMR spectrum of **5l**

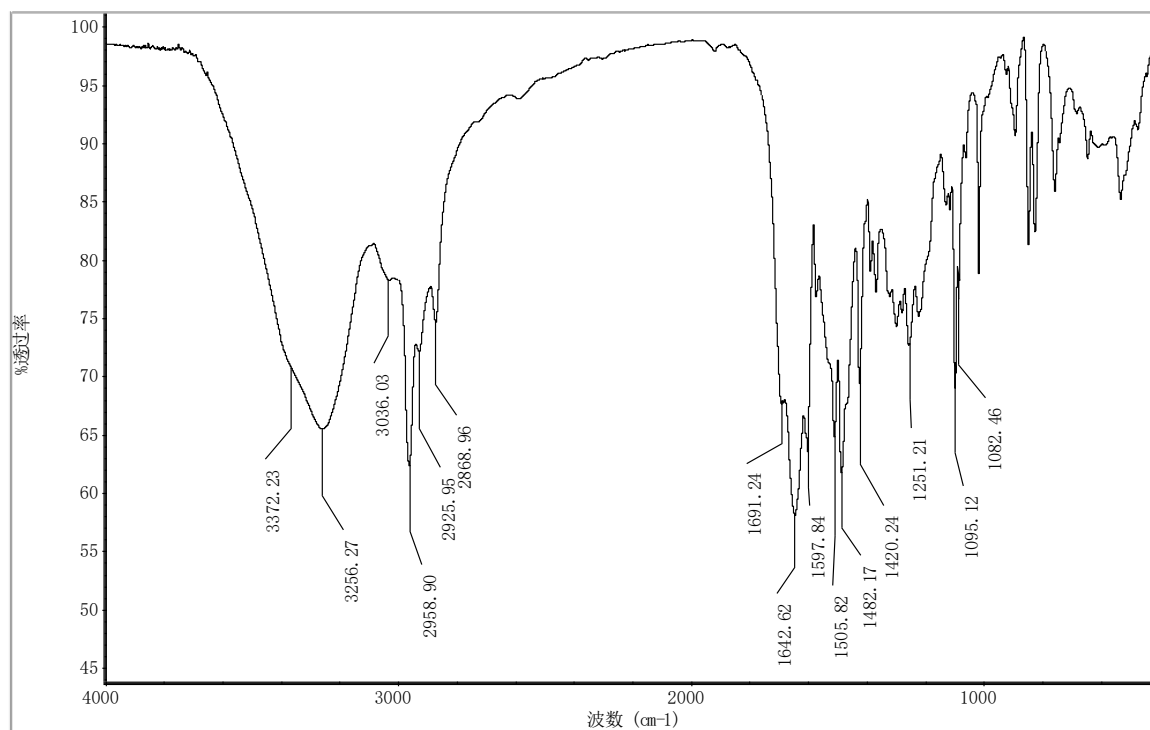

Figure S49. IR spectrum of **5m**



ZSY-7 #49-57 RT: 0.84-0.98 AV: 9 SB: 40 0.22-0.69 1.25-1.44 NI: 1.13E7  
T: +cESI Q1MS [100.000-1000.000]

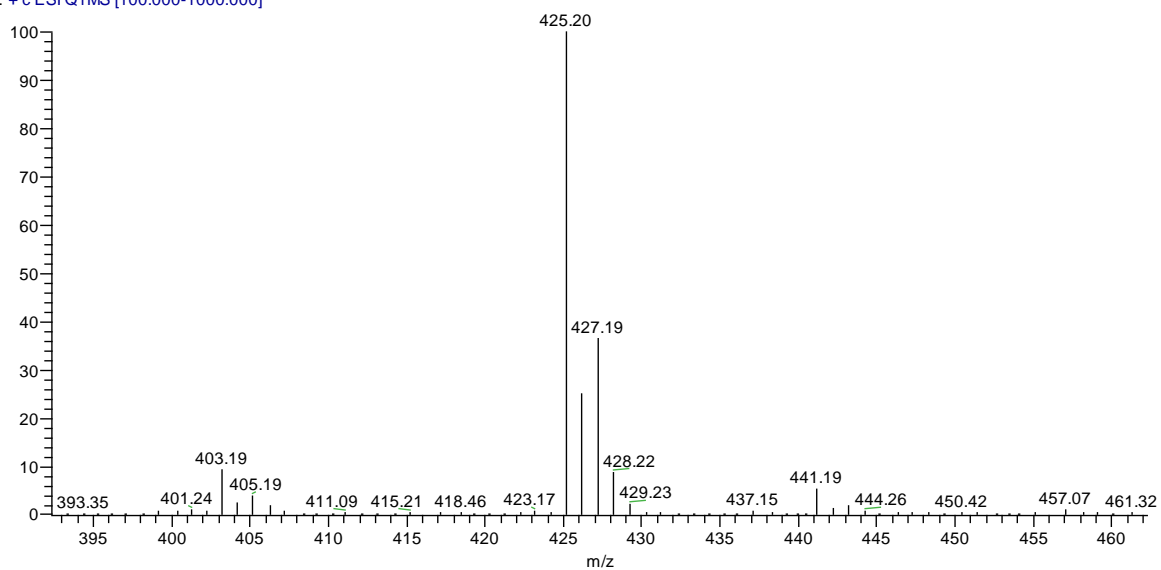

Figure S50. MS spectrum of 5m

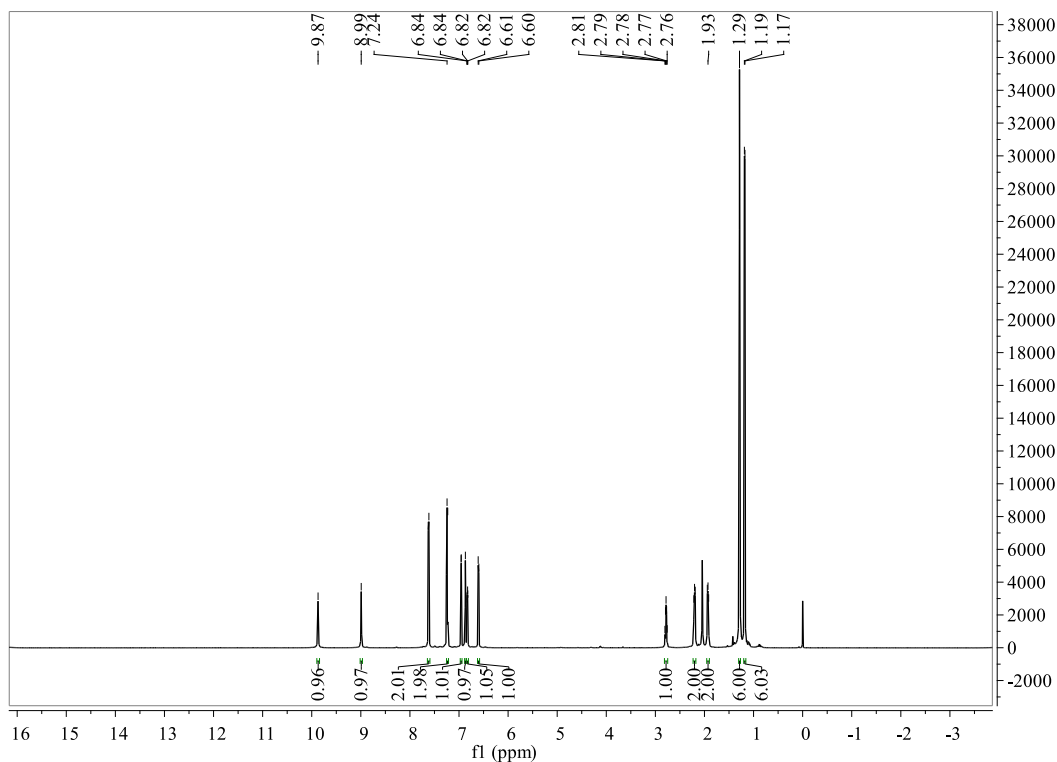

Figure S51.  $^1\text{H}$  NMR spectrum of 5m

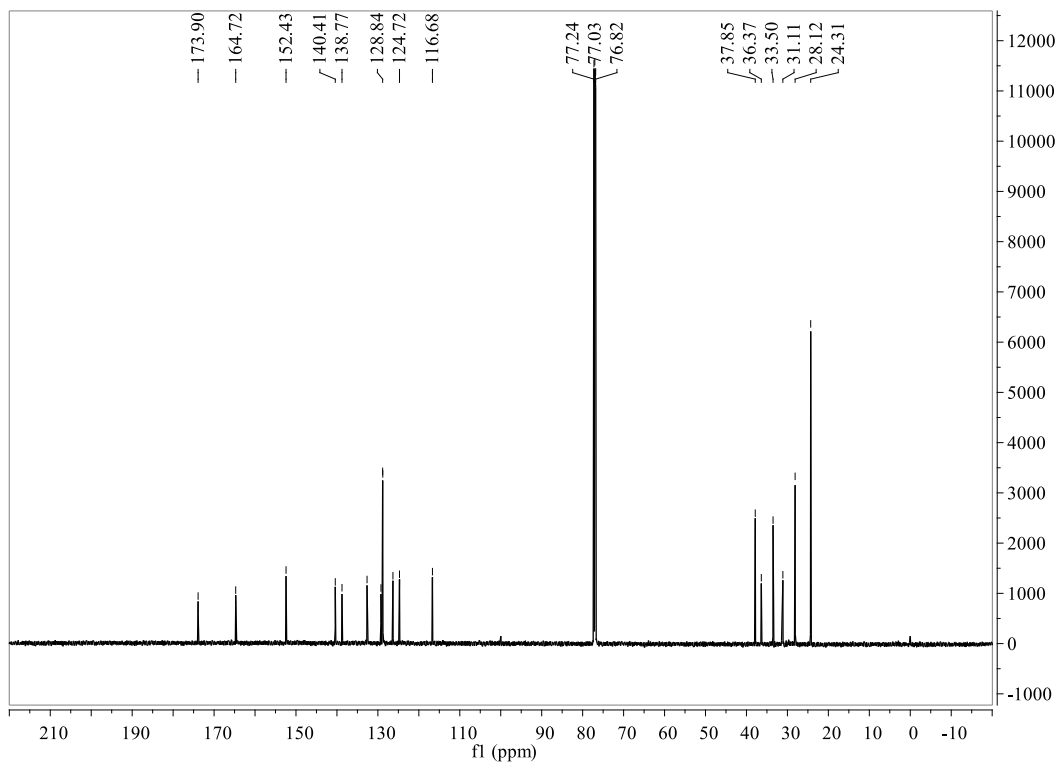

**Figure S52.  $^{13}\text{C}$  NMR spectrum of 5m**

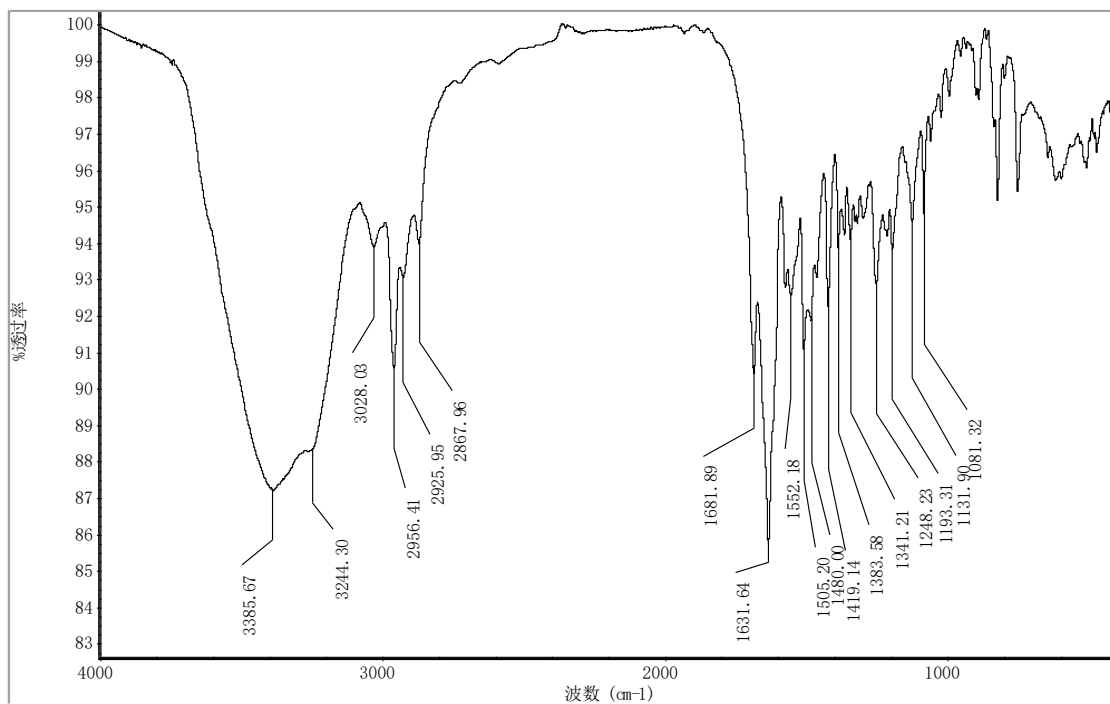

**Figure S53. IR spectrum of 5n**

ZSY-9 #68 RT: 0.59 AV: 1 NL: 1.39E7  
T: + c ESI Q1MS [100.000-800.000]

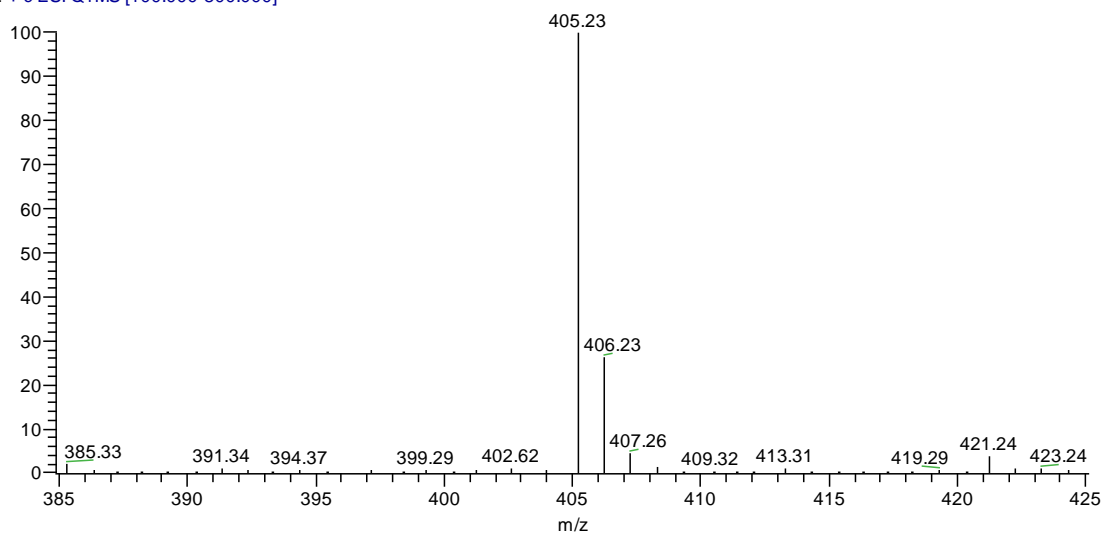

Figure S54. MS spectrum of 5n

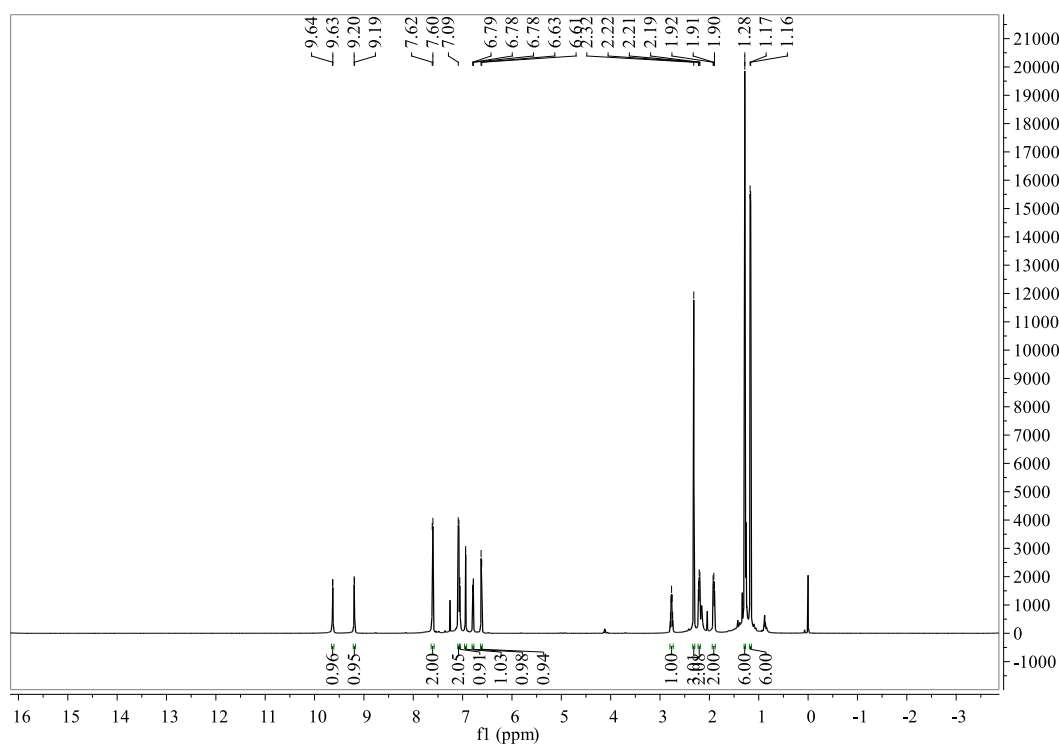

Figure S55. <sup>1</sup>H NMR spectrum of 5n

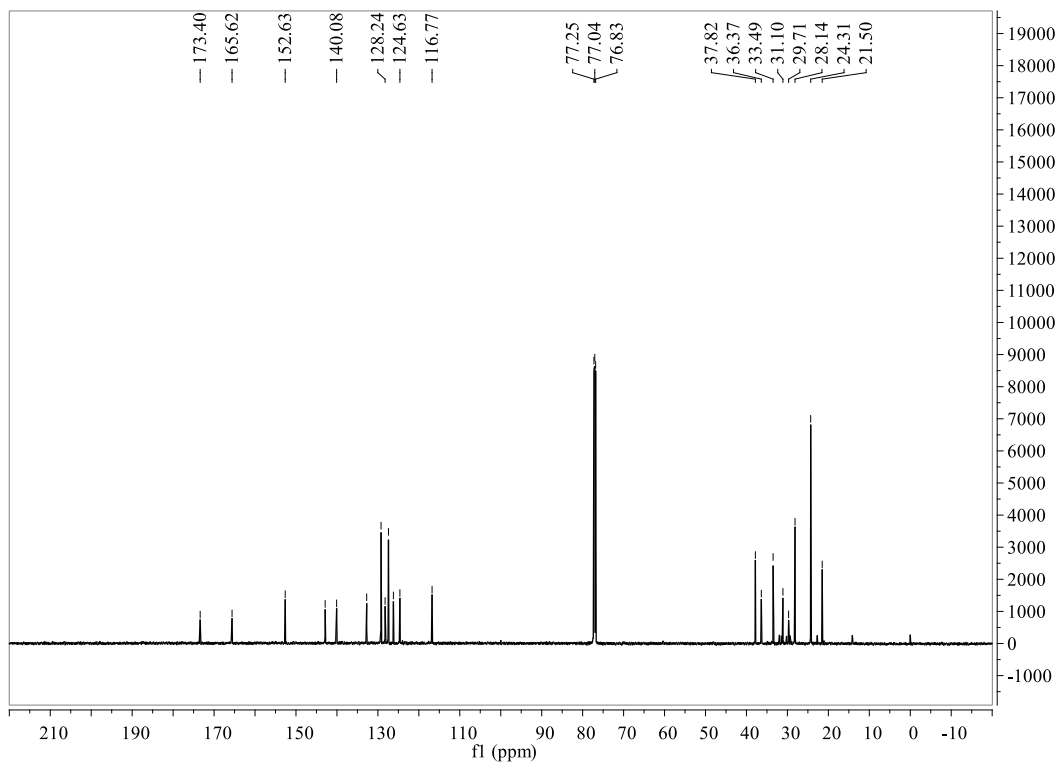

**Figure S56.  $^{13}\text{C}$  NMR spectrum of 5n**

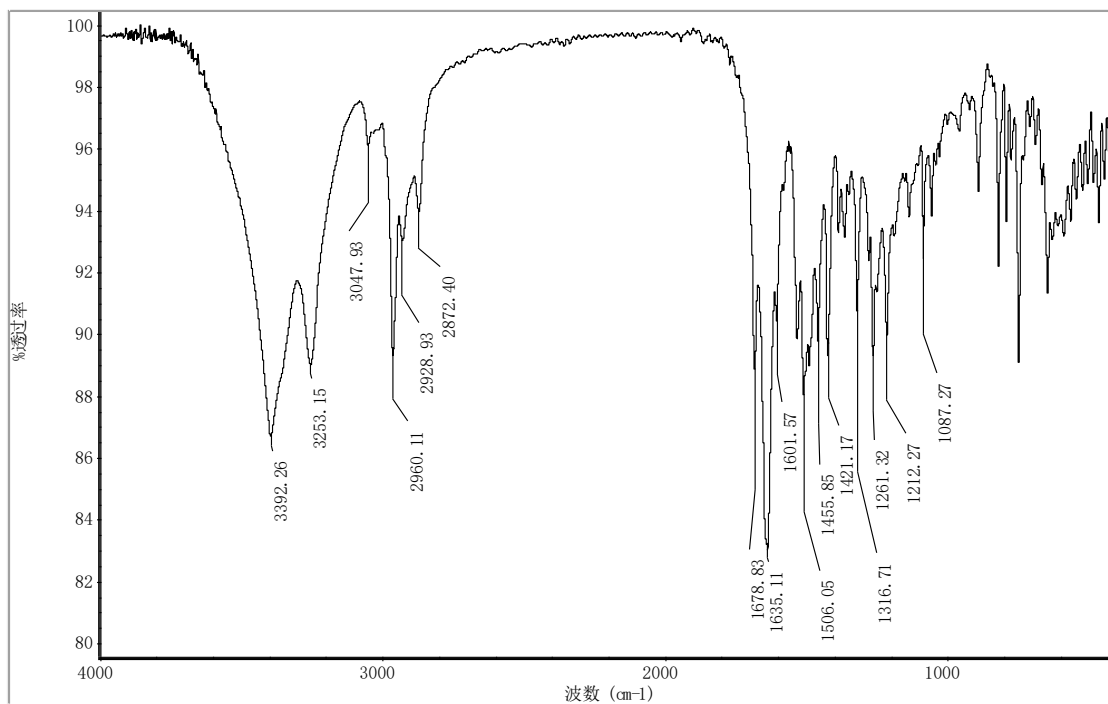

**Figure S57. IR spectrum of 5o**

ZSY-8 #68 RT: 0.59 AV: 1 NL: 8.85E6  
T: + c ESI Q1MS [100.000-800.000]

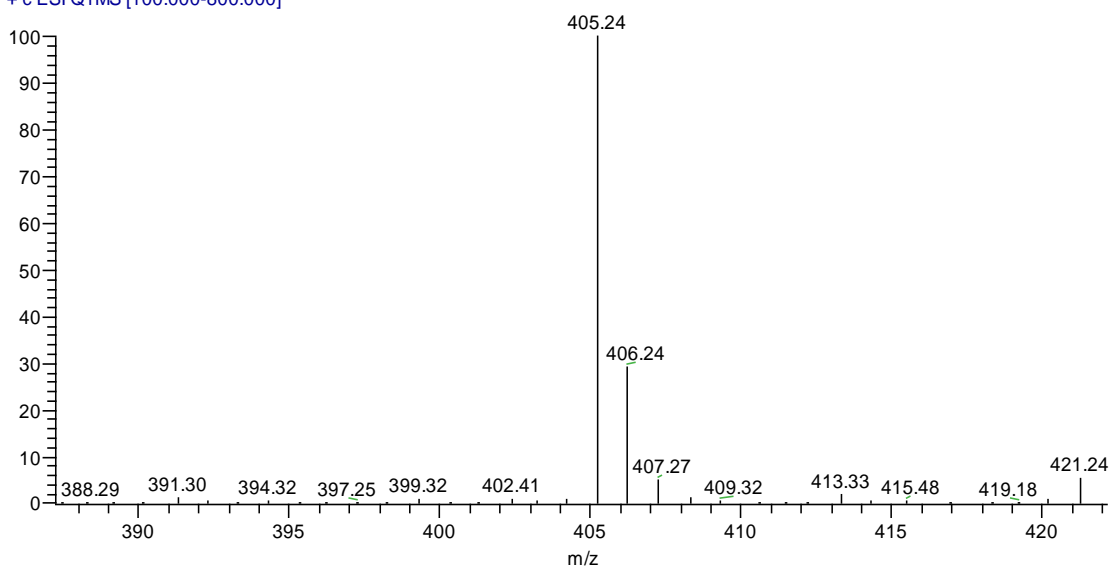

Figure S58. MS spectrum of 50

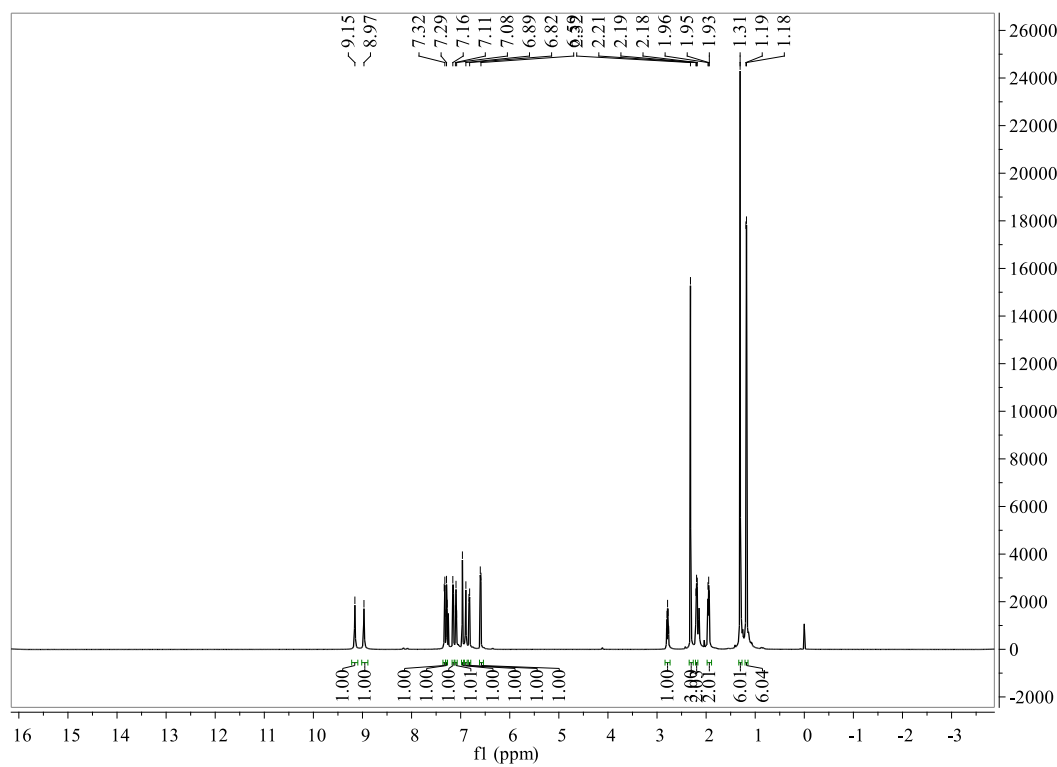

Figure S59. <sup>1</sup>H NMR spectrum of 50

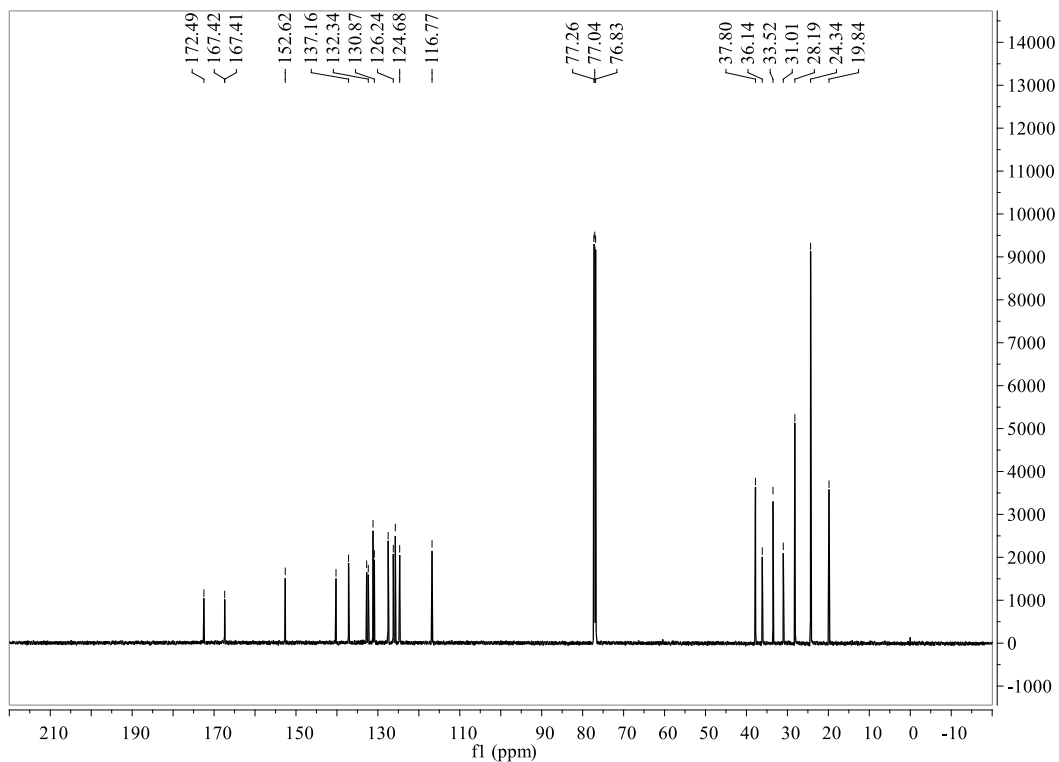

Figure S60.  $^{13}\text{C}$  NMR spectrum of **5o**

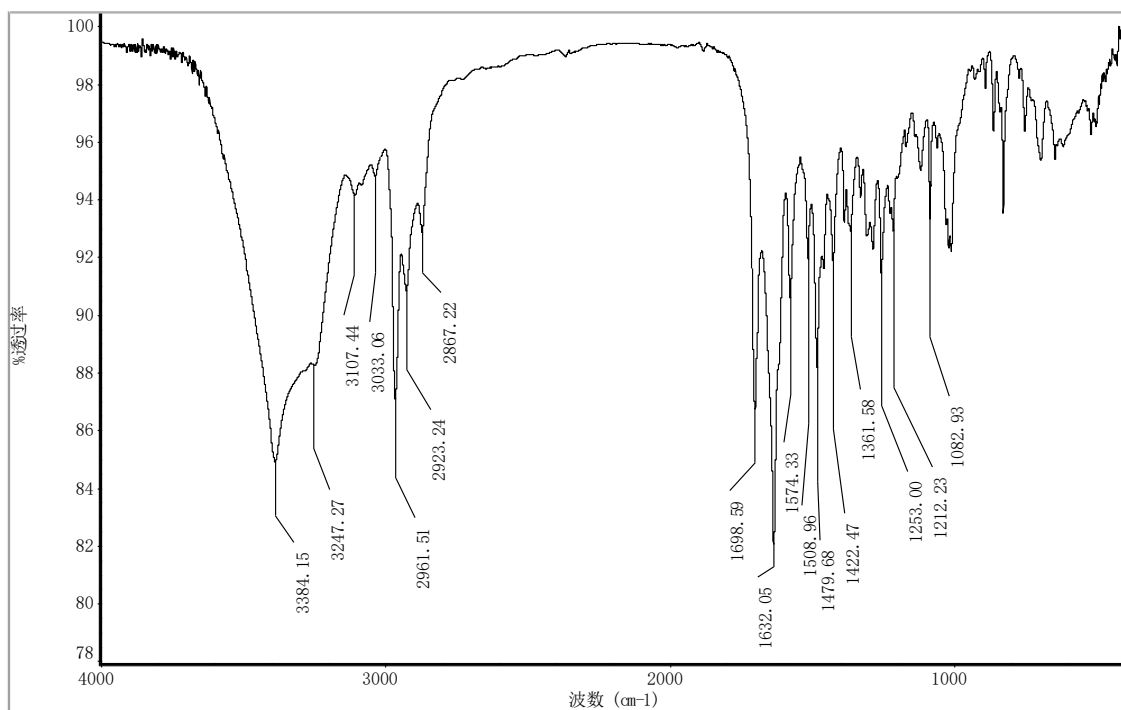

Figure S61. IR spectrum of **5p**

ZSY-21 #72 RT: 0.63 AV: 1 NL: 9.57E6  
T: + c ESI Q1MS [100.000-800.000]

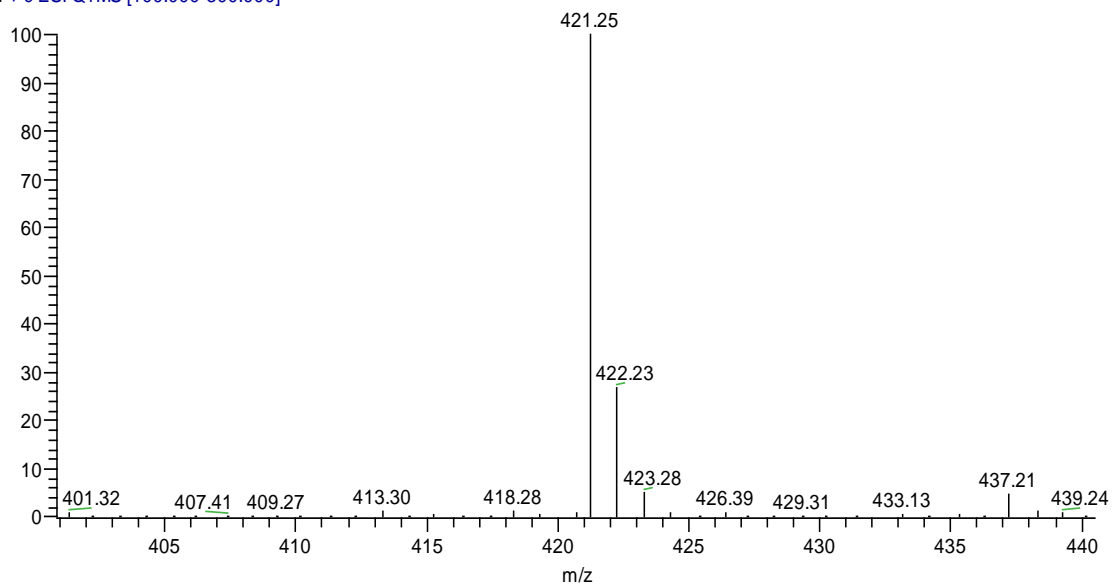

Figure S62. MS spectrum of 5p

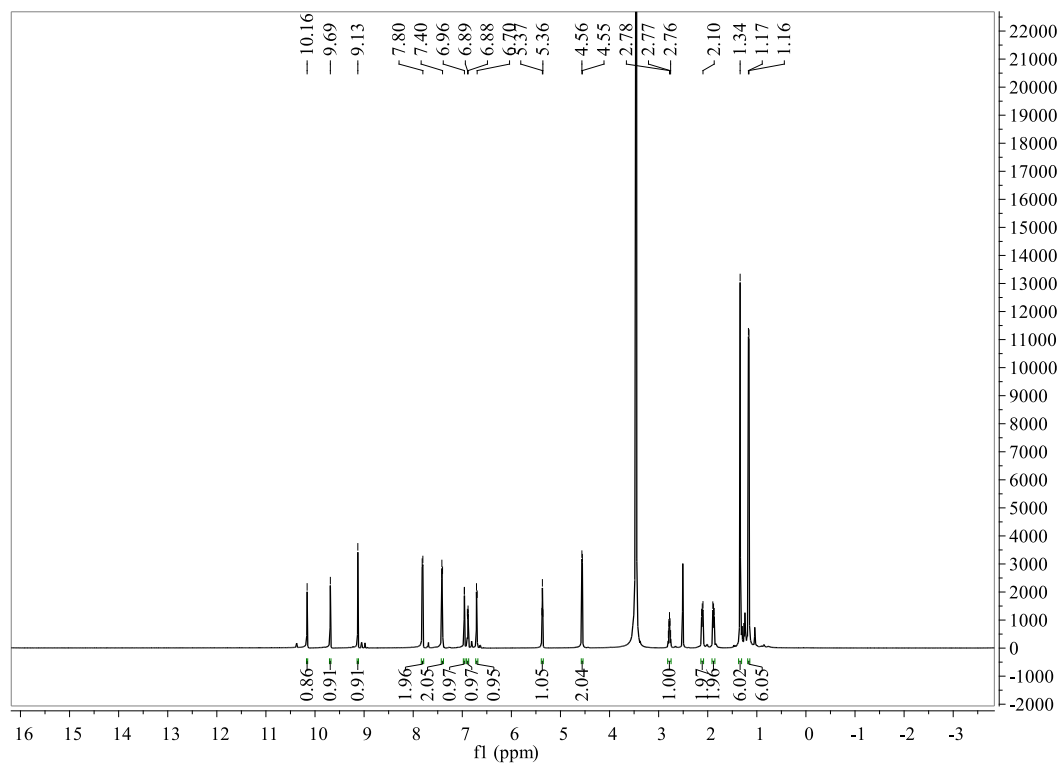

Figure S63. <sup>1</sup>H NMR spectrum of 5p

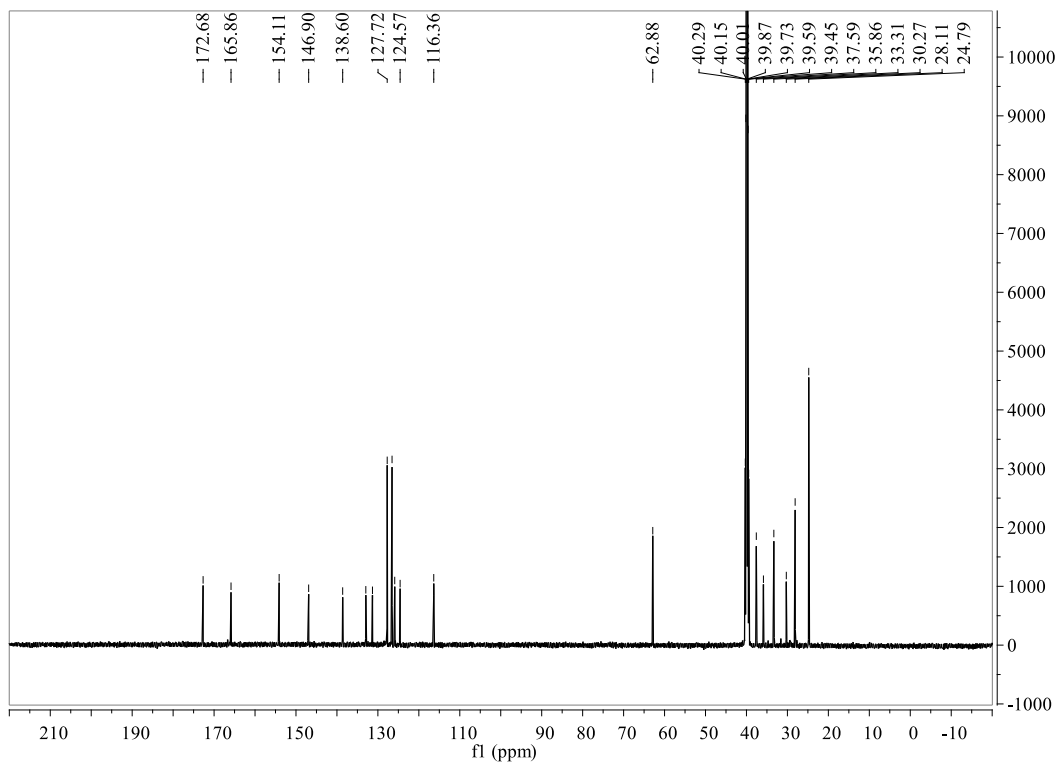

Figure S64.  $^{13}\text{C}$  NMR spectrum of 5p

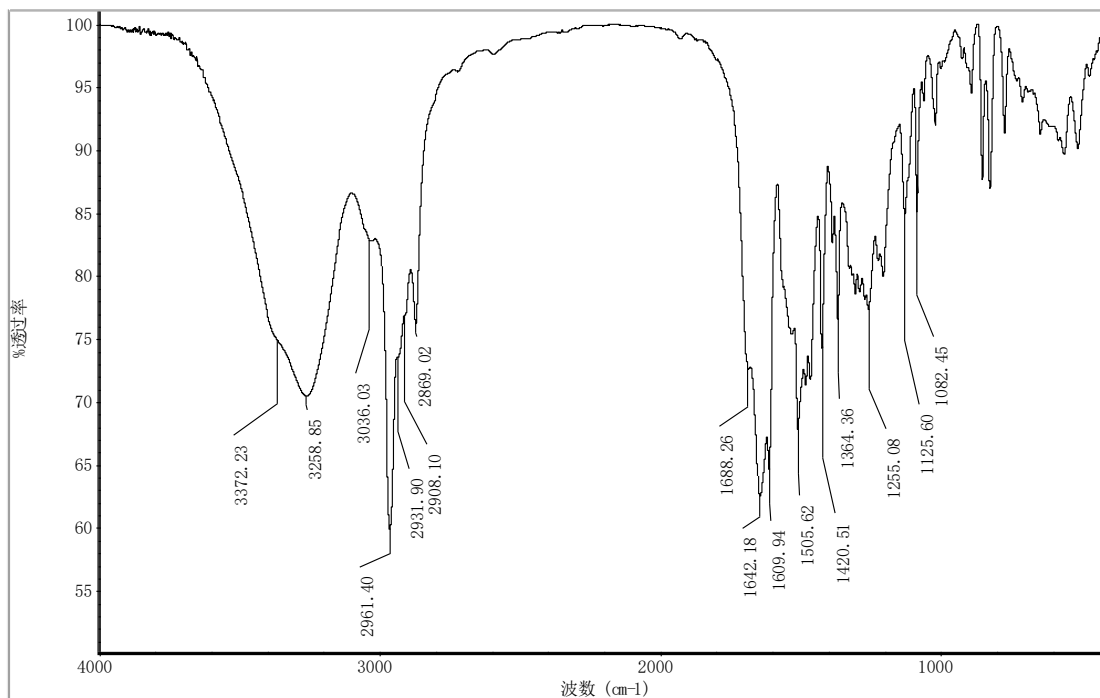

Figure S65. IR spectrum of 5q



ZSY-4 #14 RT: 0.22 AV: 1 SB: 33 0.00-0.12  
T: +c ESI Q1MS [200.000-600.000]

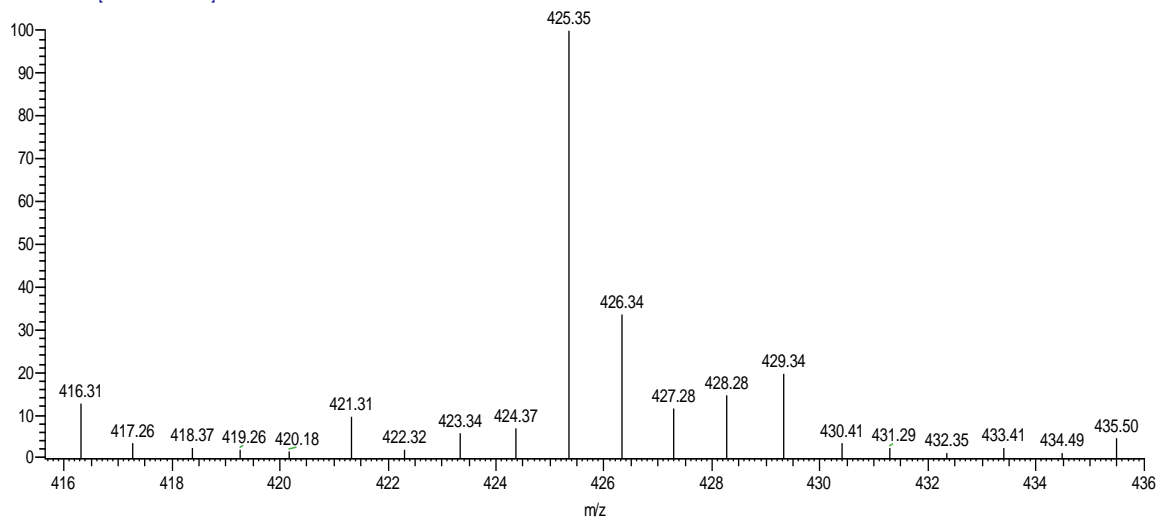

Figure S66. MS spectrum of 5q

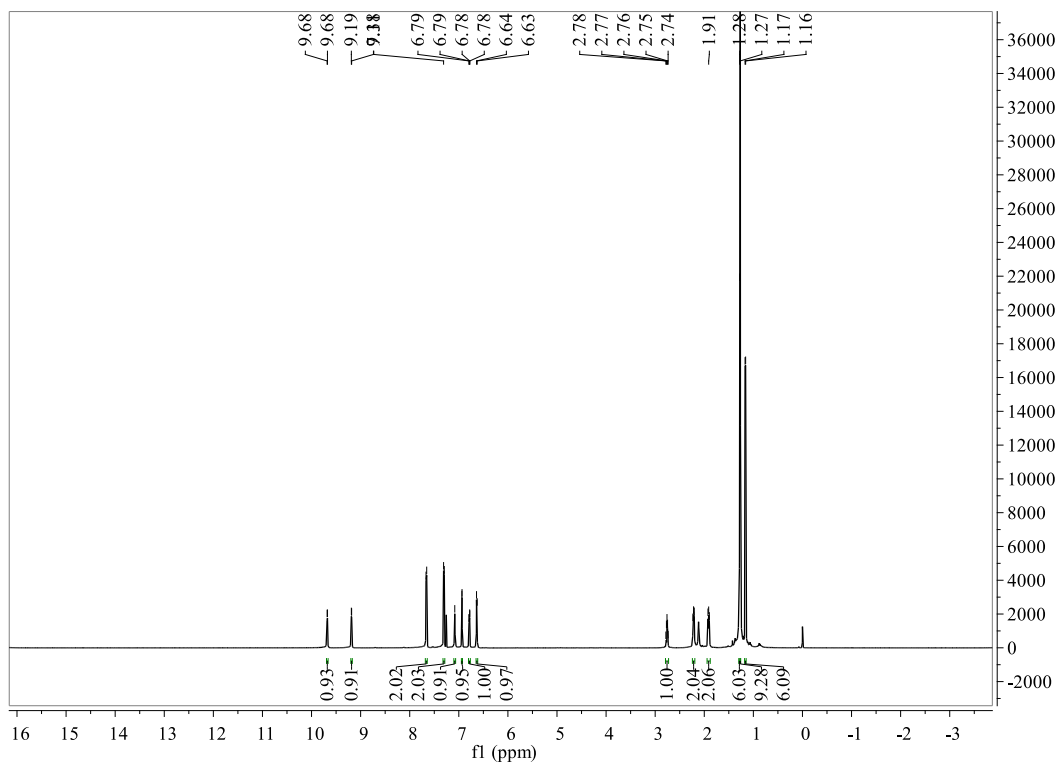

Figure S67. <sup>1</sup>H NMR spectrum of 5q

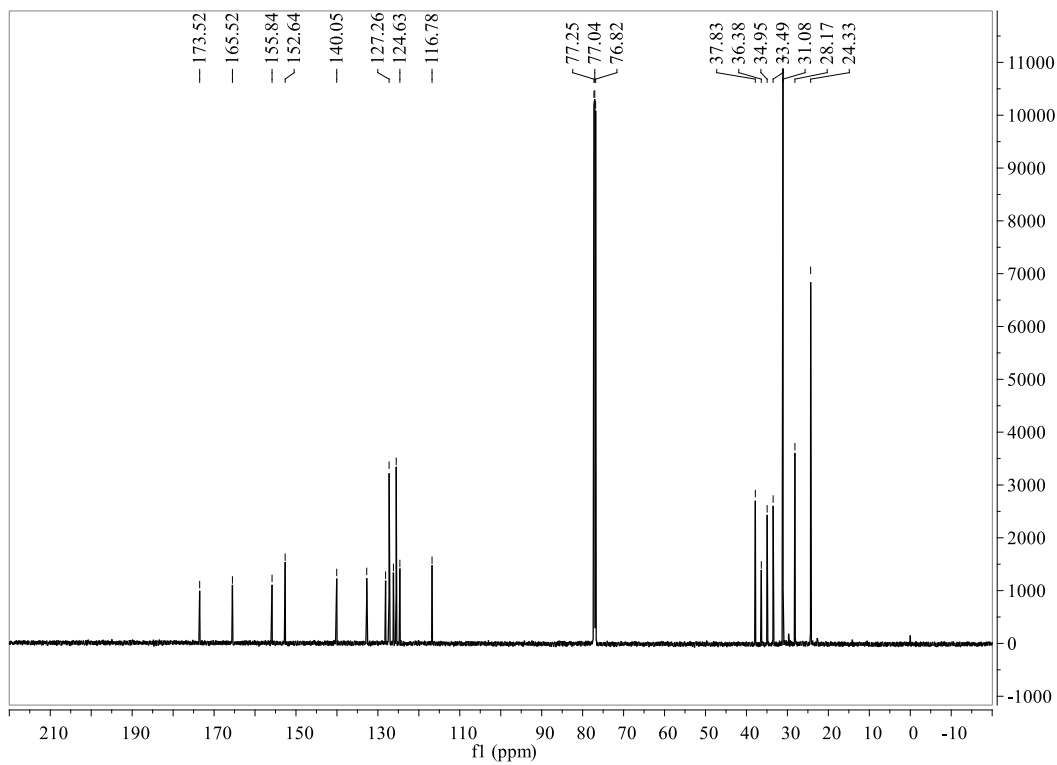

Figure S68.  $^{13}\text{C}$  NMR spectrum of **5q**

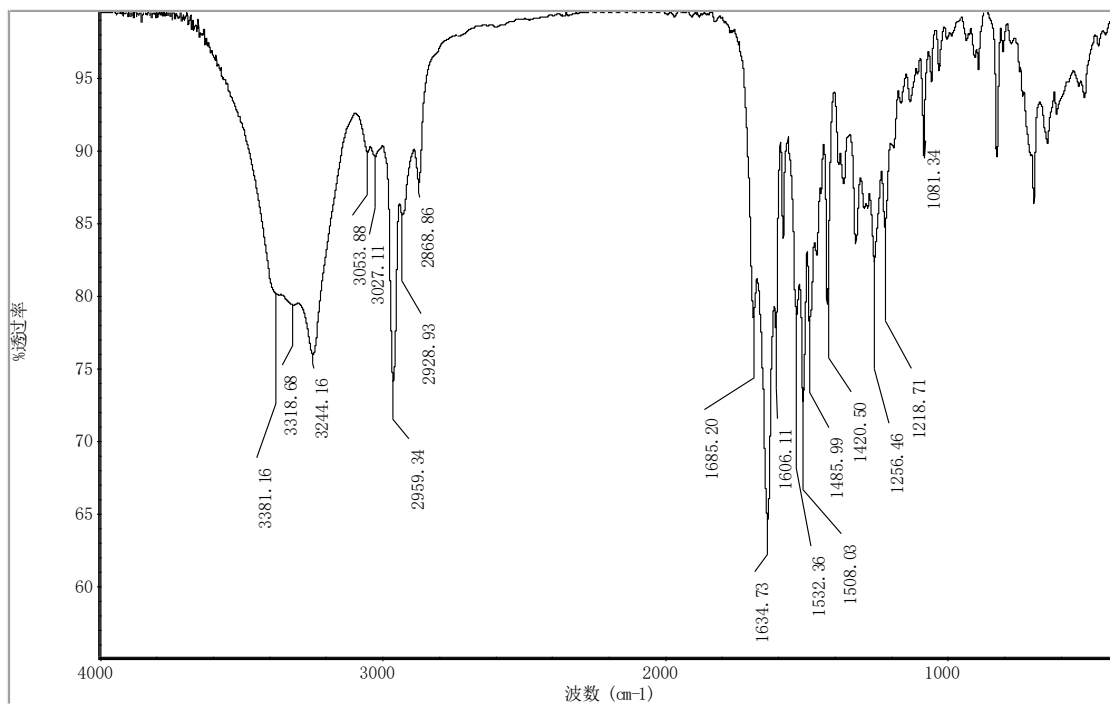

Figure S69. IR spectrum of **5r**

ZSY-2 #16-25 RT: 0.26-0.41 AV: 10 SB: 19  
T: + c ESI Q1MS [200.000-600.000]

34E6

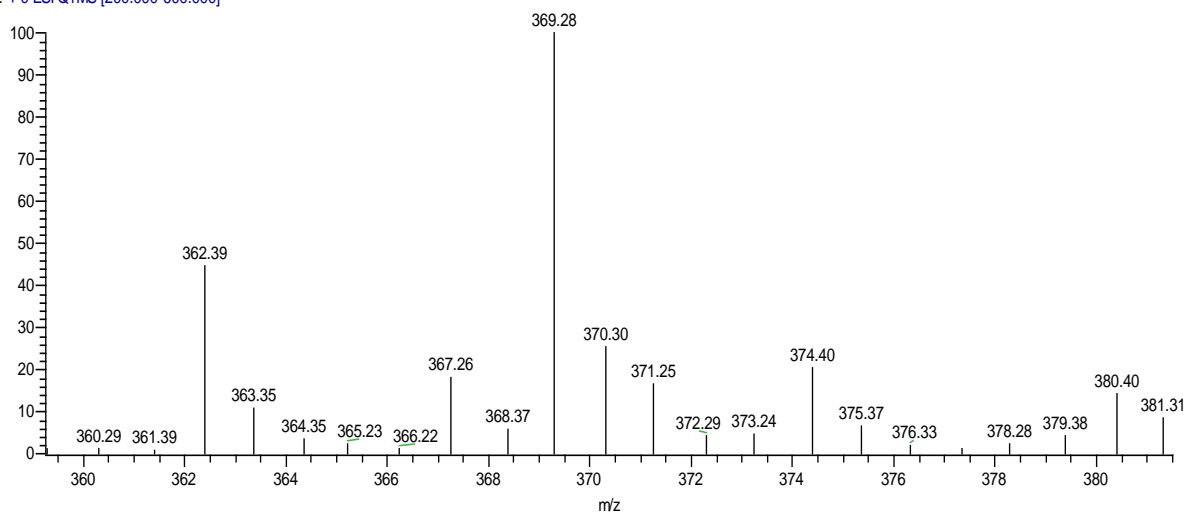

Figure S70. MS spectrum of 5r

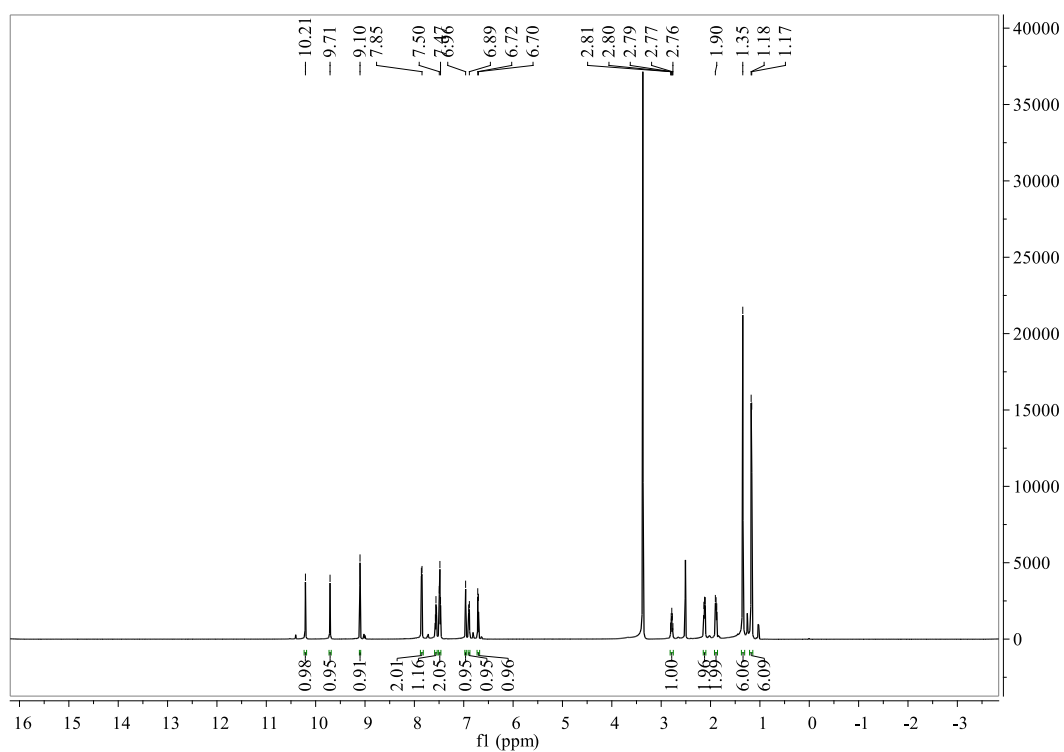

Figure S71. <sup>1</sup>H NMR spectrum of 5r

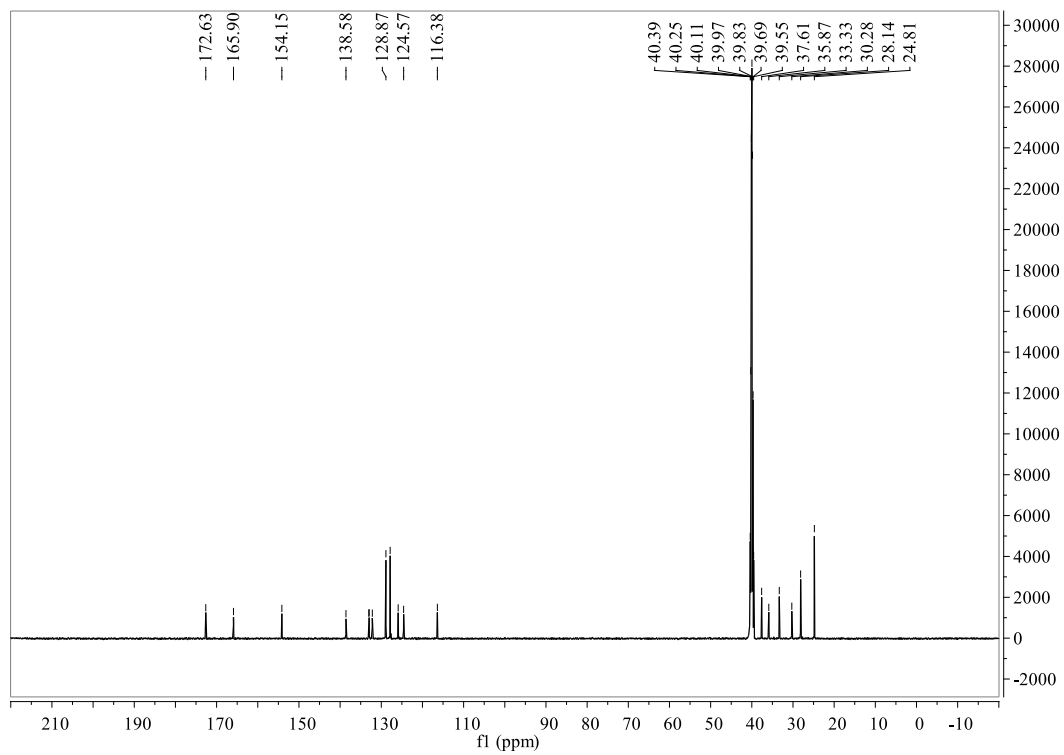

**Figure S72.** <sup>13</sup>C NMR spectrum of **5r**

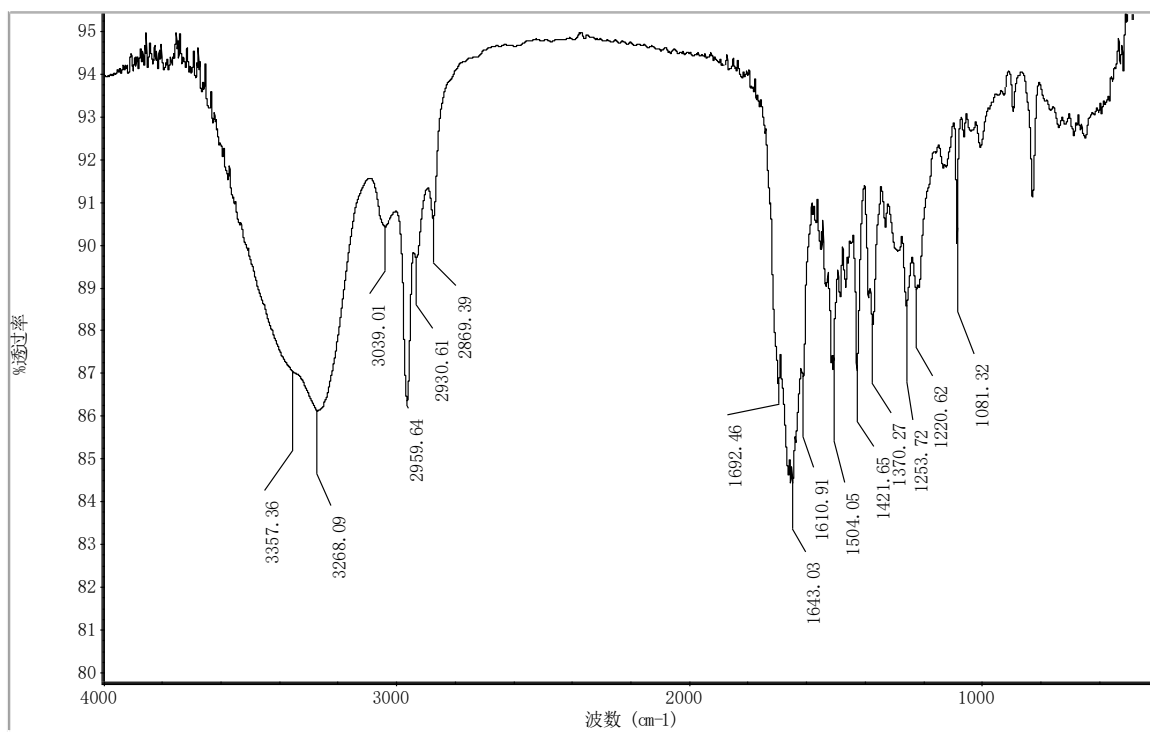

**Figure S73.** IR spectrum of **5s**

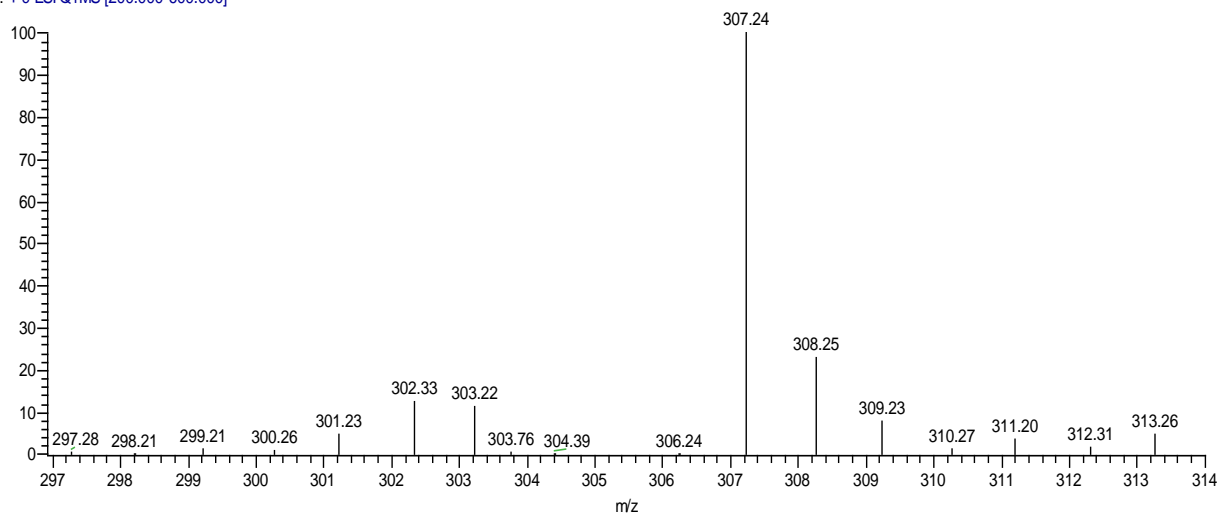

Figure S74. MS spectrum of 5s

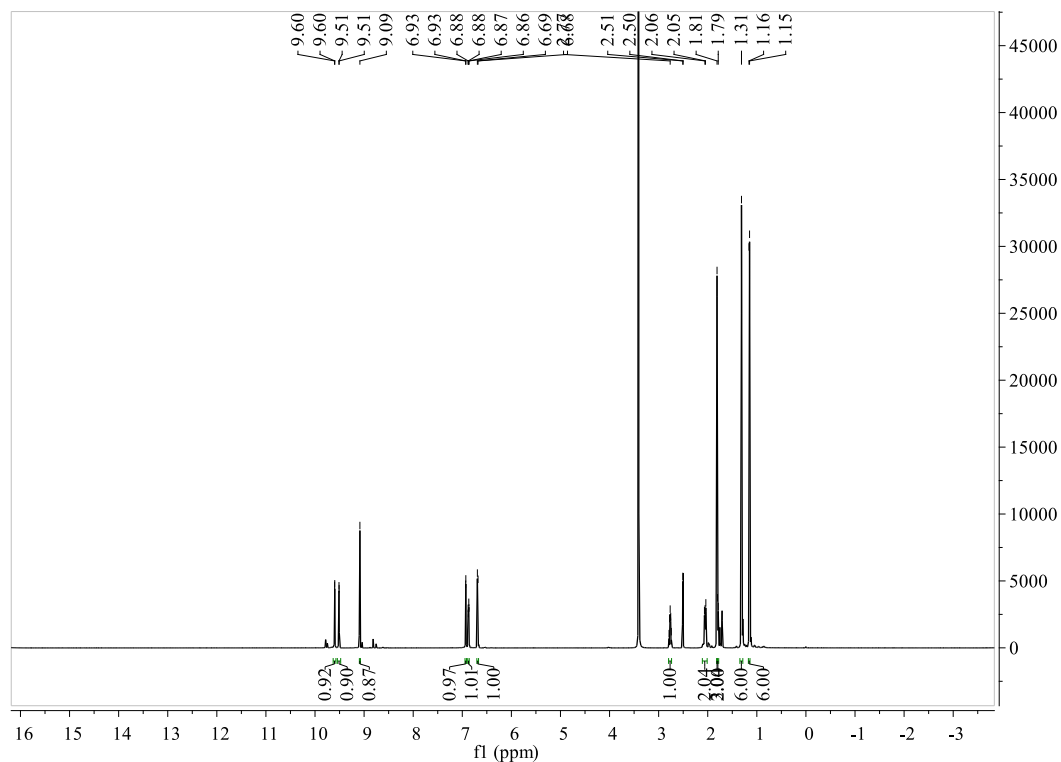

Figure S75.  $^1\text{H}$  NMR spectrum of 5s

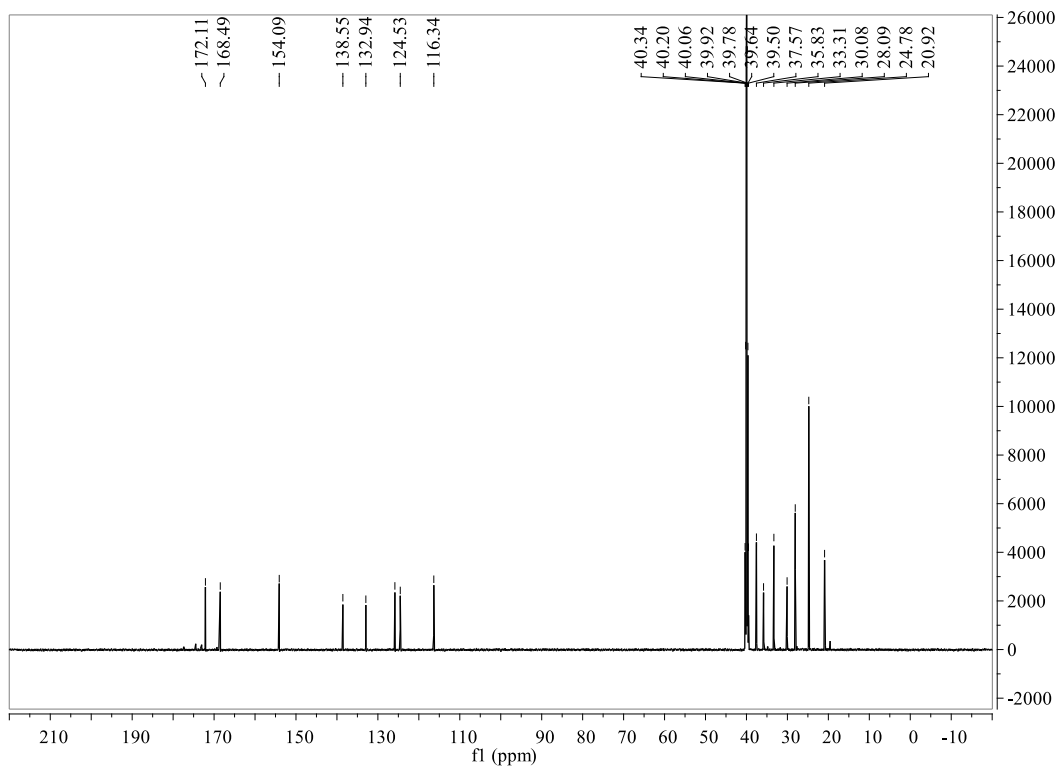

**Figure S76.**  $^{13}\text{C}$  NMR spectrum of **5s**

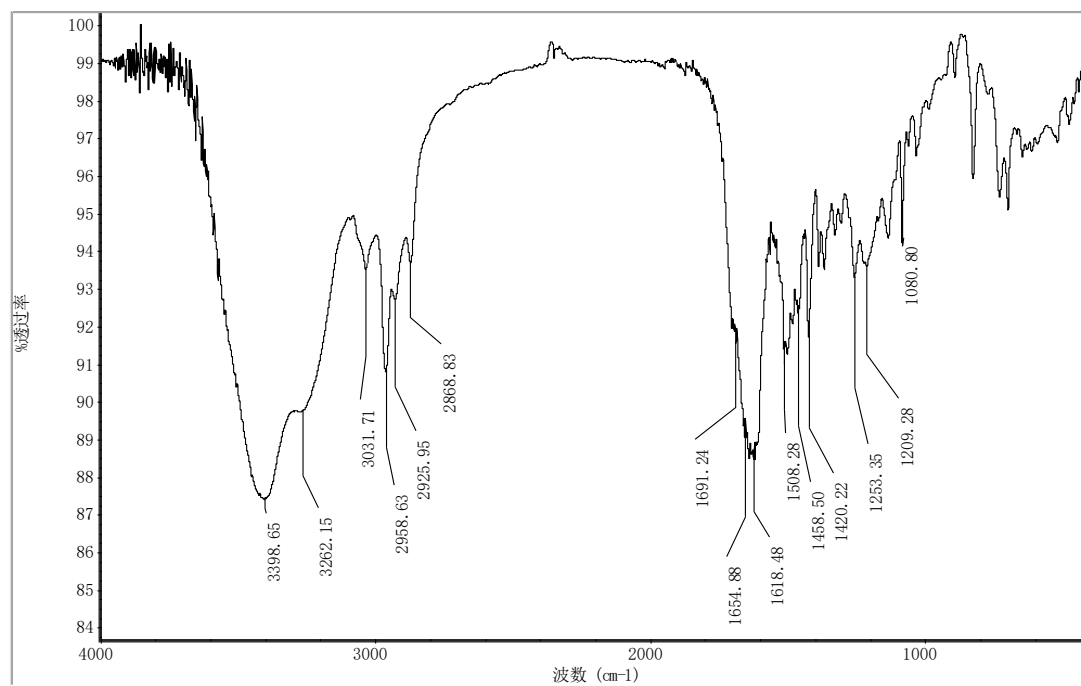

**Figure S77.** IR spectrum of **5t**

ZSY-3 #38 RT: 0.64 AV: 1 SB: 34 0.18-0.42  
T: +c ESI Q1MS [200.000-600.000]

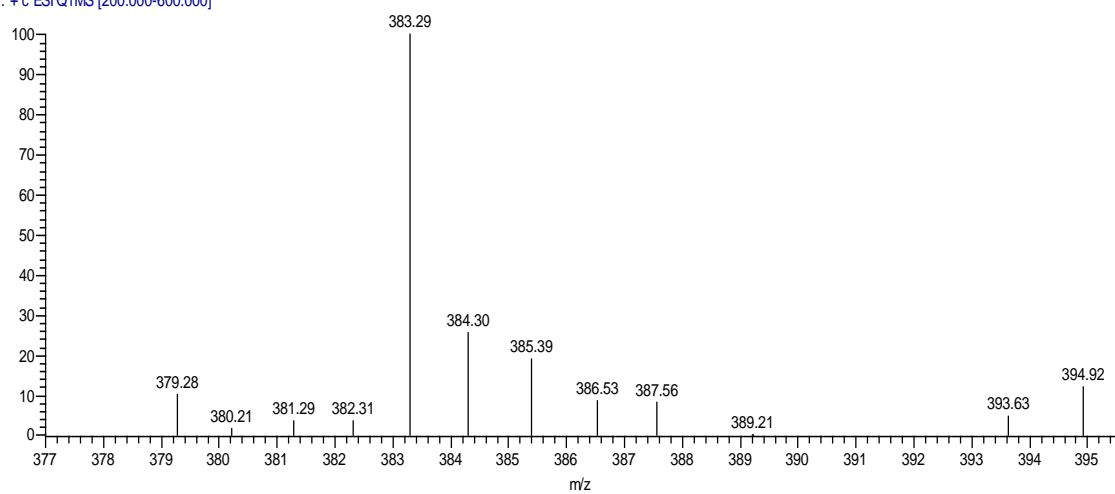

Figure S78. MS spectrum of 5t

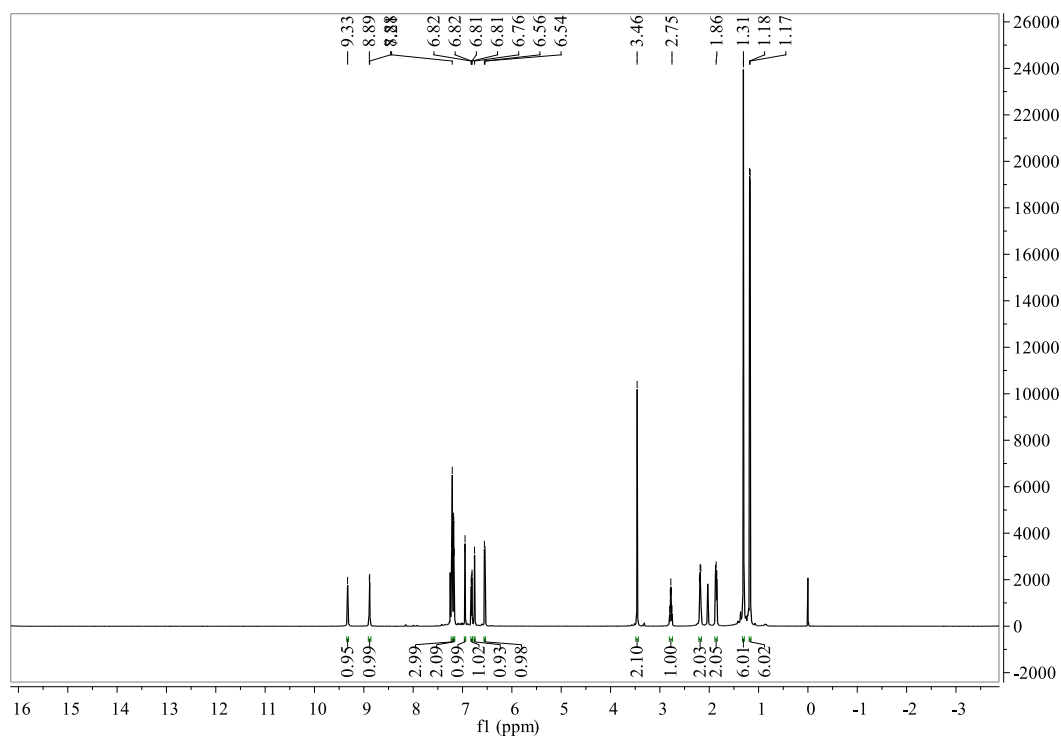

Figure S79.  $^1\text{H}$  NMR spectrum of 5t

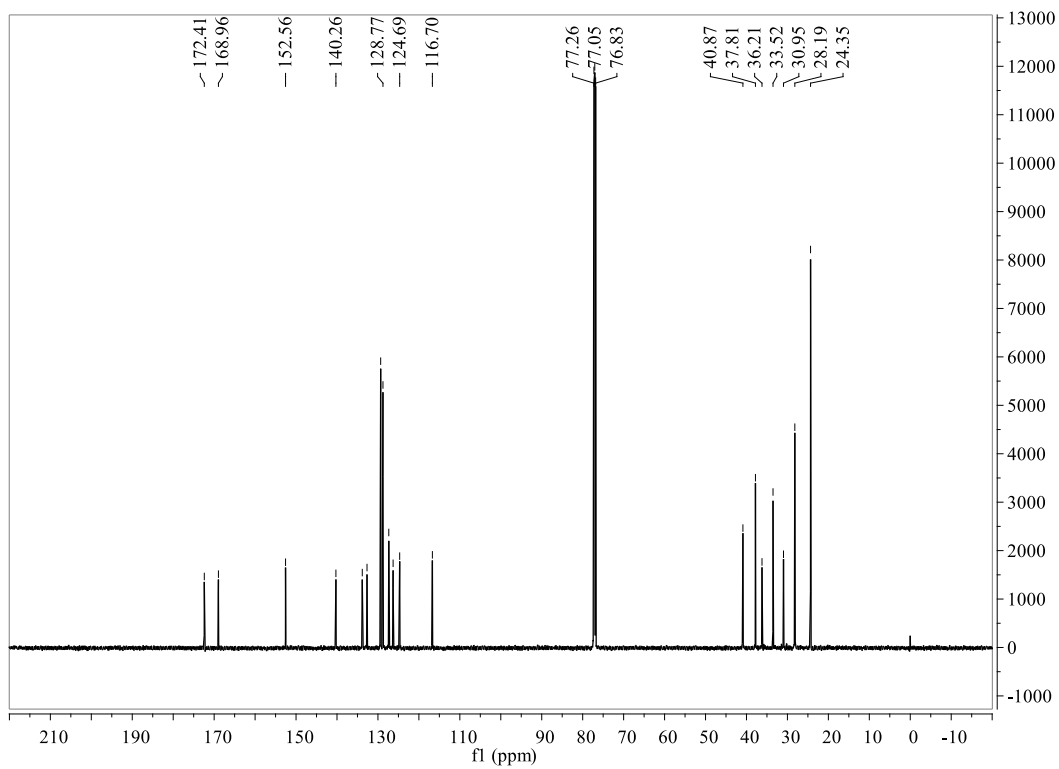

**Figure S80.** <sup>13</sup>C NMR spectrum of **5t**

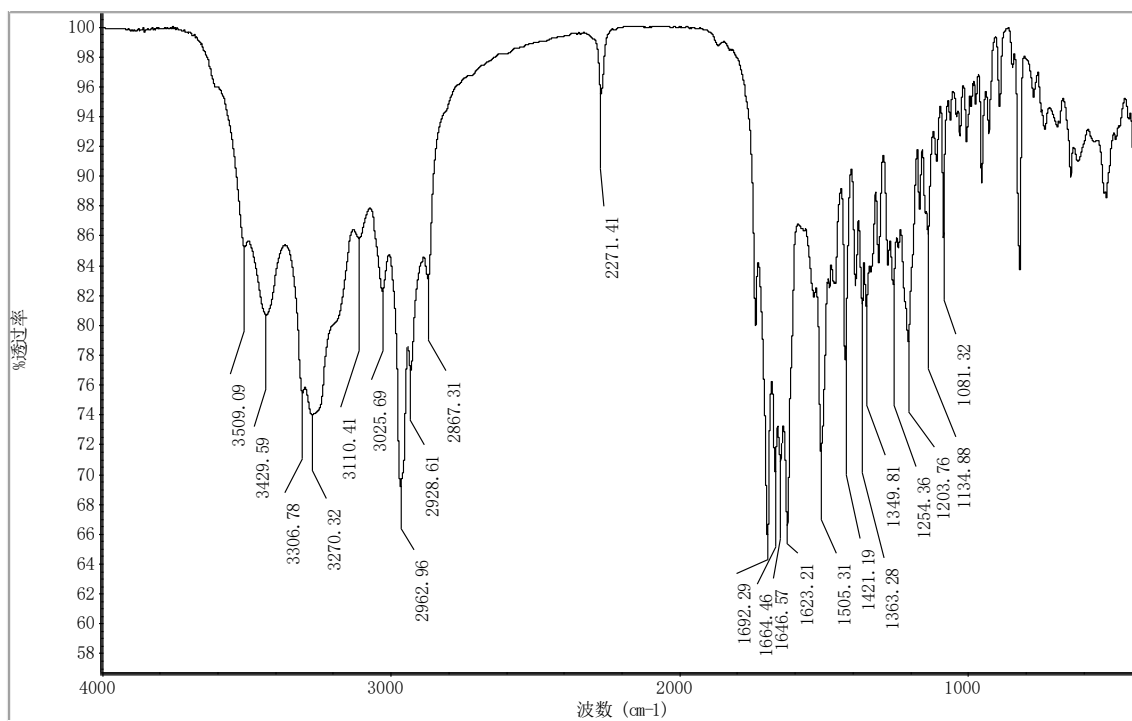

**Figure S81.** IR spectrum of **5u**



ZSY-16 #64 RT: 0.56 AV: 1 NL: 1.22E7  
T: + c ESI Q1MS [100.000-800.000]

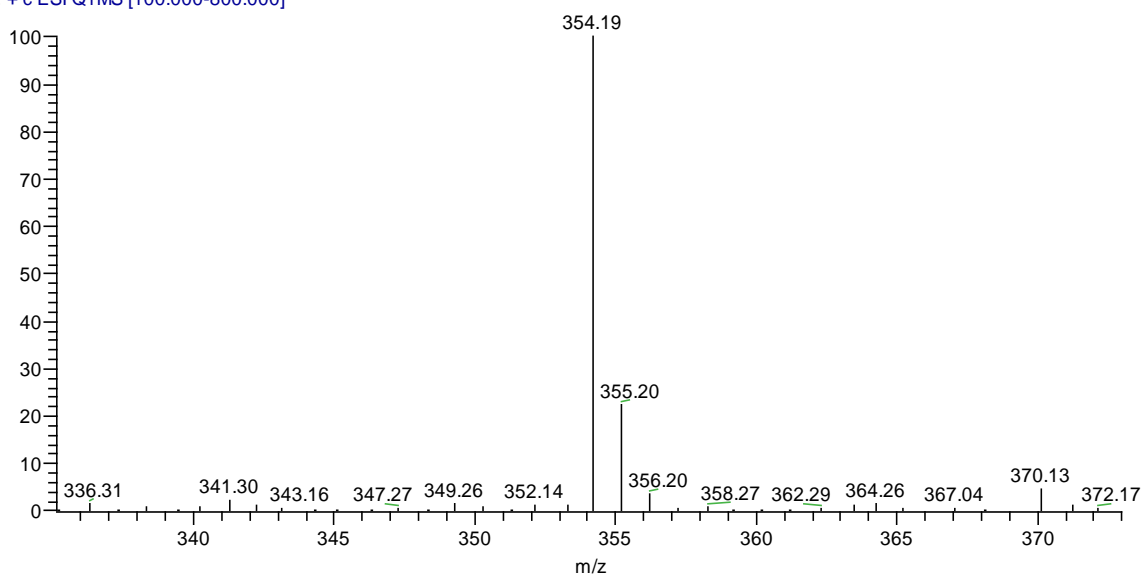

Figure S82. MS spectrum of 5u

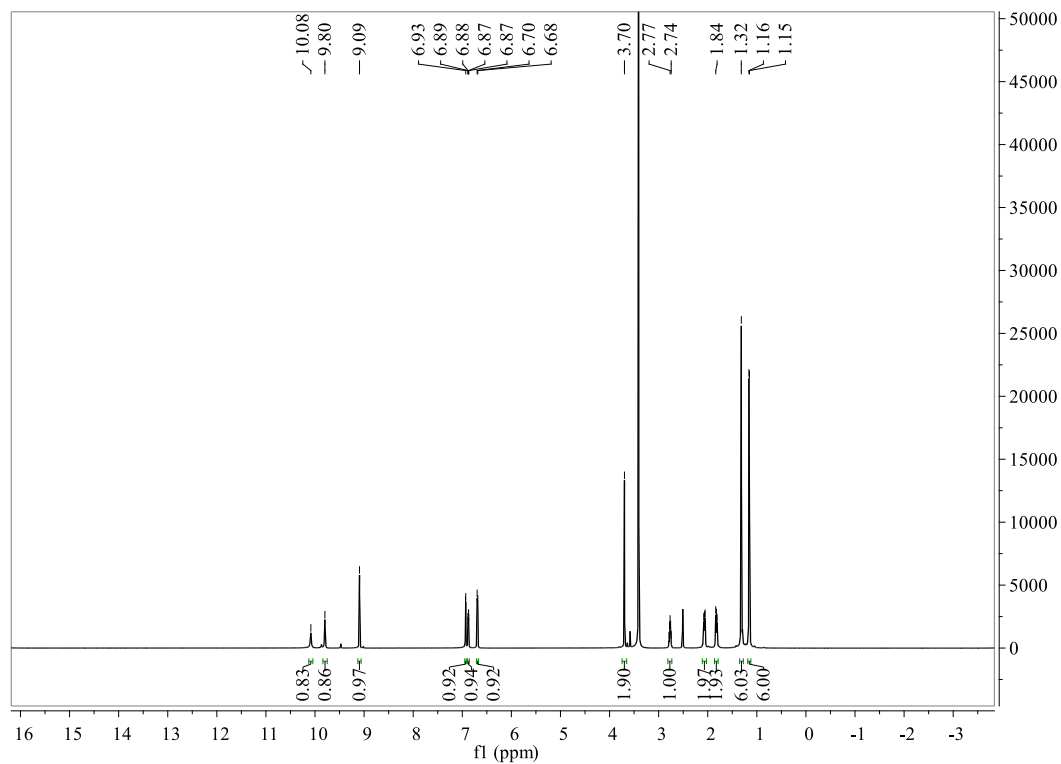

Figure S83. <sup>1</sup>H NMR spectrum of 5u

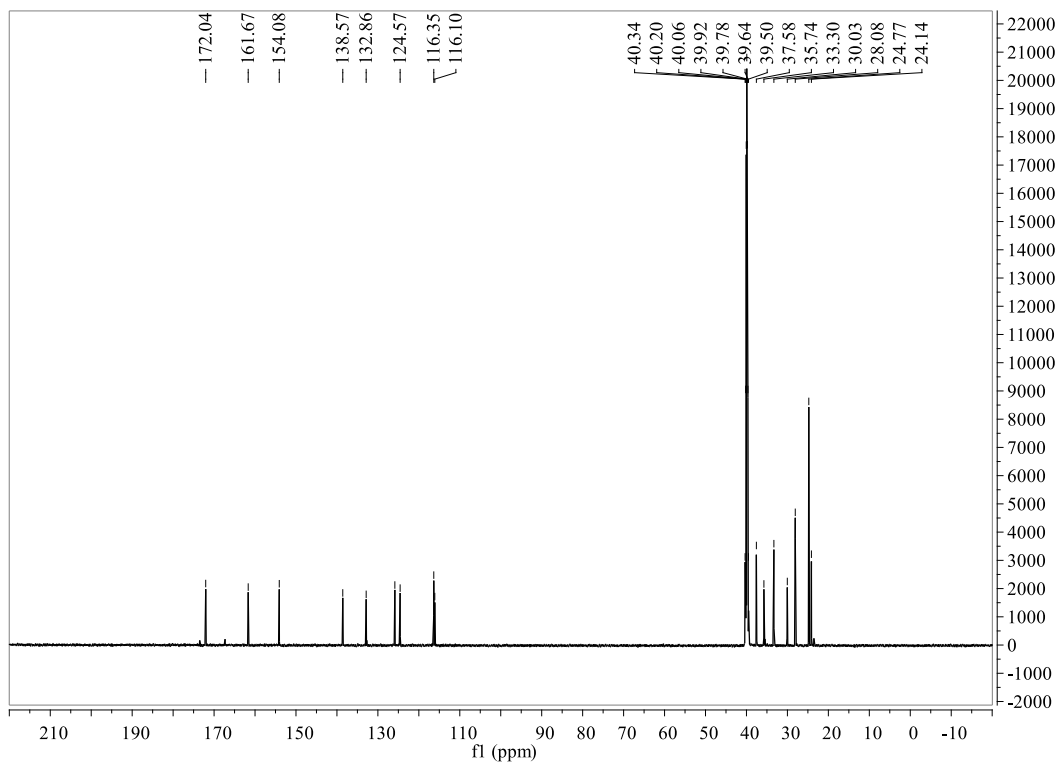

Figure S84.  $^{13}\text{C}$  NMR spectrum of **5u**

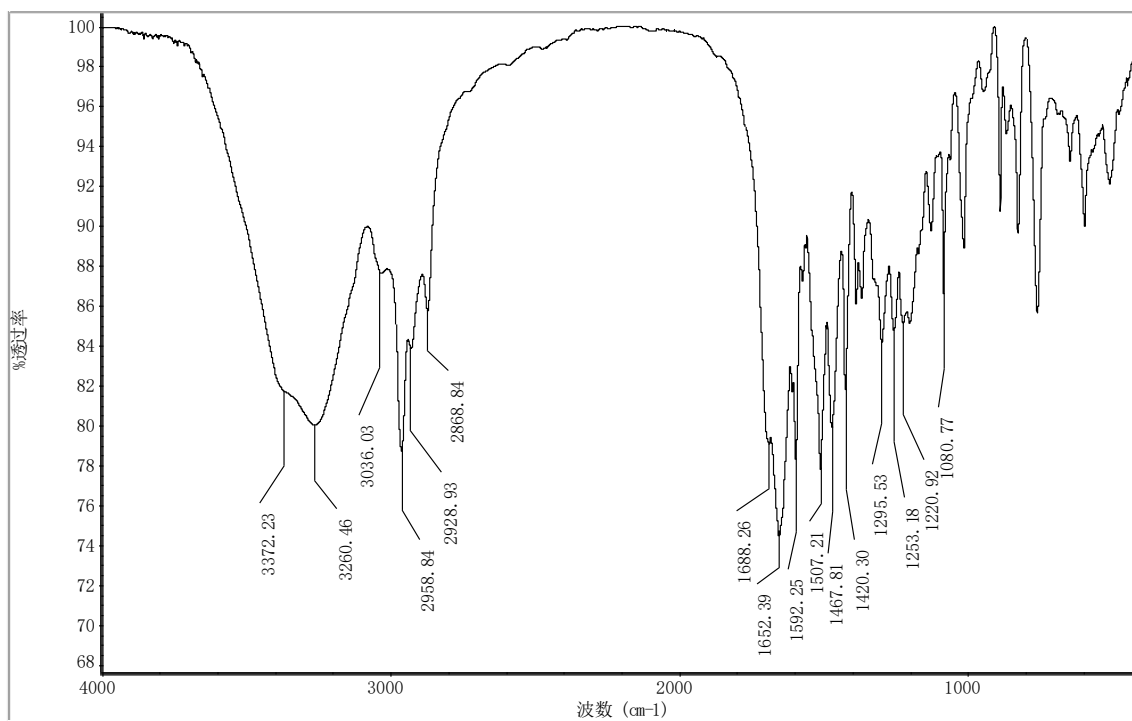

Figure S85. IR spectrum of **5v**

ZSY-22 #60 RT: 0.52 AV: 1 NL: 1.84E7  
T: + c ESI Q1MS [100.000-800.000]

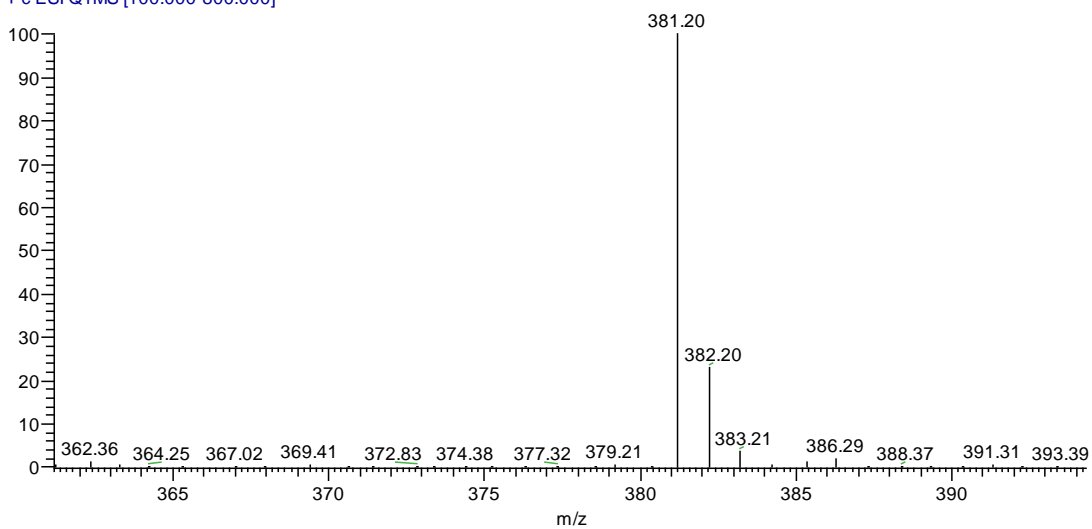

Figure S86. MS spectrum of 5v

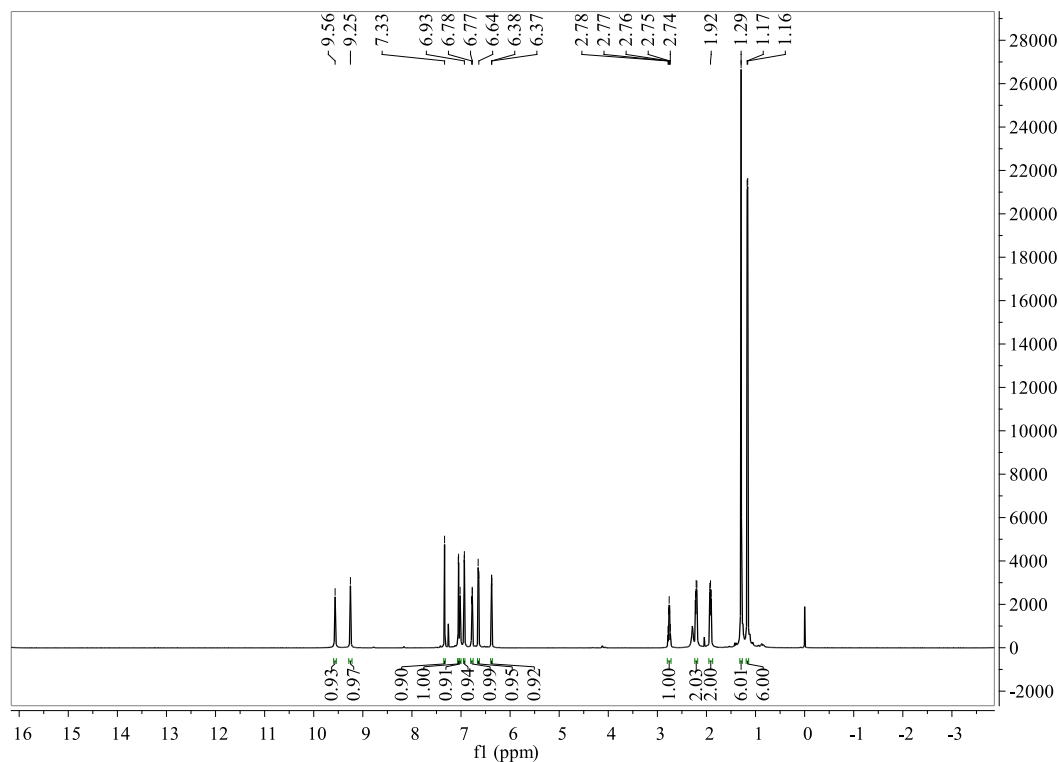

Figure S87. <sup>1</sup>H NMR spectrum of 5v

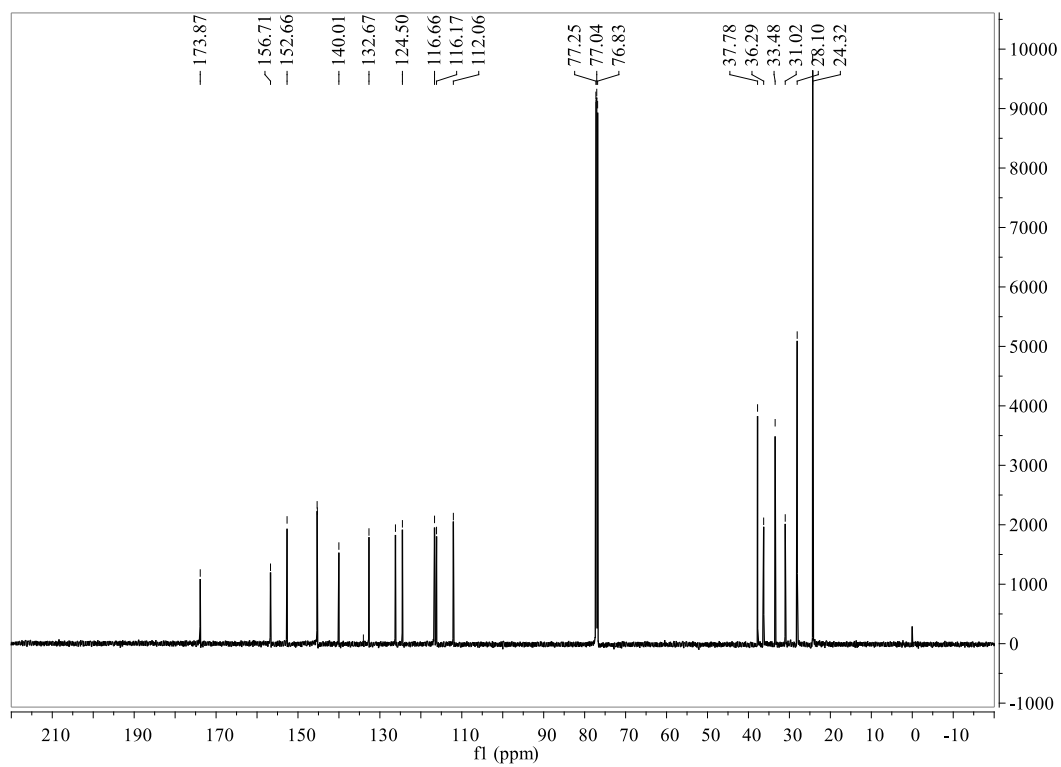

**Figure S88.**  $^{13}\text{C}$  NMR spectrum of **5v**

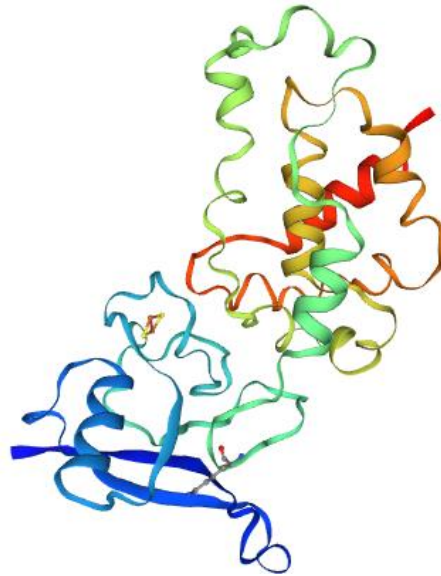

**Figure S89.** The 3D structure [UniProtKB AC P32420, homology modeling built using PDB ID: 2FBW.1.B (Avian respiratory complex II with carboxin bound) as a template]

|          |                                                                           |     |
|----------|---------------------------------------------------------------------------|-----|
| MODEL    | PQHLKQFKIYRWNPDKPSEKPRQLQSYTLDLNQTGPMVLDALIKIKNEIDPTLTFRRSCREGICGSCAMNI   | 118 |
| 2fbw.1.B | TSRIKKFSIYRWD PDKPGDKPRMQTYEVDLNKCGPMVLDALIKIKNELDSTLTFRRSCREGICGSCAMNI   | 77  |
| MODEL    | DGVNTLACLCRIDK--QNDTKIYPLPHMYIVKDLVPDLTQFYKQYRSIEPFLKSNNTPSEG--EHLQSPE    | 184 |
| 2fbw.1.B | AGGNTLACTKKIDPDL SKITTKIYPLPHMYVVKDLVPDL SNFYAQYKSIEPYLKKKDESKQGKEQYLQSIE | 147 |
| MODEL    | ERRRLDGLYECILCACCSTSCPSYWWNQDEYLGPAVLMQAYRWMADSRDDDFGEERRQKLENTFSLYRCHT   | 254 |
| 2fbw.1.B | DRQKLDGLYECILCACCSTSCPSYWWNGDKYLGPAVLMQAYRWMIDSRDDYTEERLAQLQDPFSLYRCHT    | 217 |
| MODEL    | IMNCSRTC PKNLNPGKATAIQIKKDMAVGA                                           | 283 |
| 2fbw.1.B | IMNCTRITCPKGLNPGKATAEIKKMMATYK                                            | 246 |

**Figure S90.** The sequence alignments based on 2FBW.1.B succinate dehydrogenase

Ip subunit. Sequence identity: 71.60%; Sequence similarity: 0.54

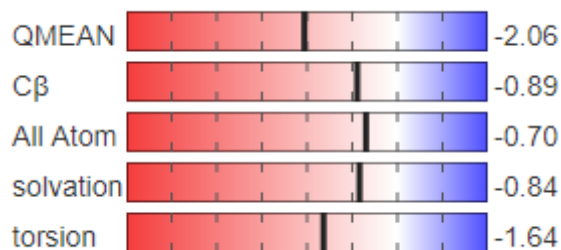

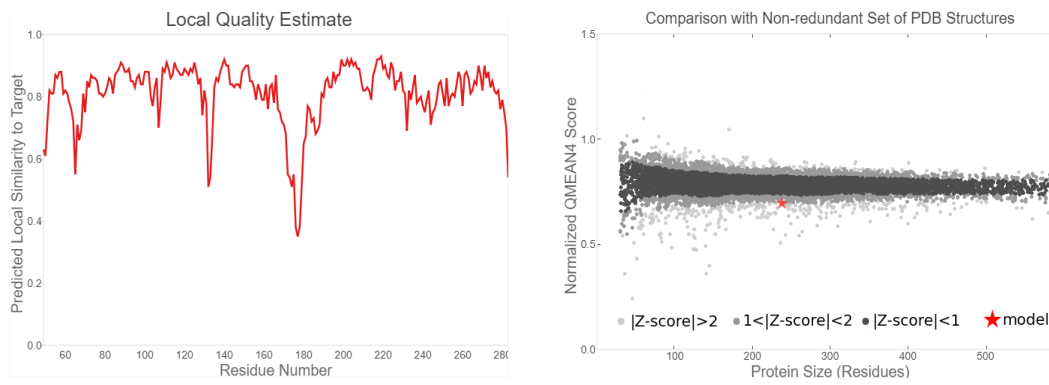

**Figure S91.** The model quality estimate of homology modeling

**Table S2** The partial result of molecular docking-based virtual screening for the designed compounds in descending order by D score vs G score based on the 3D structure of the SDH.

|    | Name     | Structure                                                                         | 1: Total_Score | 2: Crash | 3: Polar | 4: FragIndex | 5: FragRMSD | 6: D_score | 7: PMF_score | 8: G_score | 9: ChemScore | 10: CSCORE |
|----|----------|-----------------------------------------------------------------------------------|----------------|----------|----------|--------------|-------------|------------|--------------|------------|--------------|------------|
| 16 | 001_000  |  | 5.4794         | -2.0049  | 0.8662   | -1           | -1          | -107.6427  | -48.7248     | -196.78    | -23.1588     | 1          |
| 17 | 011_000  |  | 6.8146         | -2.3164  | 3.9597   | -1           | -1          | -125.1245  | -90.0153     | -201.5325  | -32.0772     | 4          |
| 18 | 023_000  |  | 6.1093         | -1.897   | 2.2898   | -1           | -1          | -130.6059  | -71.7492     | -201.6225  | -27.7335     | 2          |
| 19 | C2_1_000 |  | 5.9333         | -1.6056  | 0.0007   | -1           | -1          | -101.8321  | -62.7131     | -204.5075  | -27.1954     | 1          |

Rows: 0/101 | Data Columns: (2/10) | Visible Rows: 101 | Filtered Rows: 0 | Marked Rows: 0

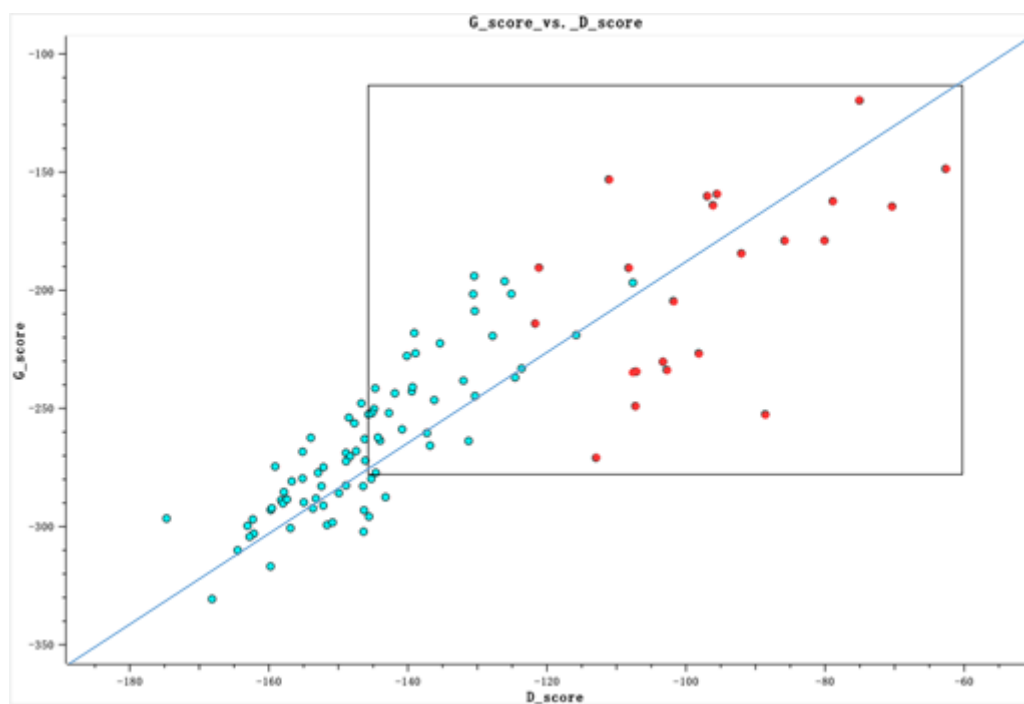

**Figure S92.** Scatter plot of D score vs G score (red spot: commercial SDHI fungicides; blue spot: designed compounds)
